# Supplementary material for: Curcumin promotes AApoAII amyloidosis and peroxisome proliferation in mice by activating the PPARα signaling pathway
Source: eLife journal article supplement (doi:10.7554/elife.63538), 2021-01-26
Supplement: supp [file elife-63538-supp-v1.zip]

Archive with 18 entries (18 files):
- elife_poa_e63538_Transparent_Reporting_File.docx
- elife_poa_e63538_Figure_1_figure_supplement_1.pdf
- elife_poa_e63538_Figure_1_figure_supplement_2.pdf
- elife_poa_e63538_Figure_1_figure_supplement_3.pdf
- elife_poa_e63538_Figure_1_figure_supplement_4.pdf
- elife_poa_e63538_Figure_1_figure_supplement_5.pdf
- elife_poa_e63538_Figure_1_figure_supplement_6.pdf
- elife_poa_e63538_Figure_1_figure_supplement_7.pdf
- elife_poa_e63538_Figure_2_figure_supplement_1.pdf
- elife_poa_e63538_Figure_3_figure_supplement_1.pdf
- elife_poa_e63538_Figure_3_source_data_1.xls
- elife_poa_e63538_Figure_3_source_data_2.xls
- elife_poa_e63538_Figure_3_source_data_3.xlsx
- elife_poa_e63538_Figure_3_source_data_4.xls
- elife_poa_e63538_Figure_3_source_data_5.xls
- elife_poa_e63538_Supplementary_file_1.xlsx
- elife_poa_e63538_Supplementary_file_2.xlsx
- elife_poa_e63538_Supplementary_file_3.docx
