# Supplementary material for: Curcumin promotes AApoAII amyloidosis and peroxisome proliferation in mice by activating the PPARα signaling pathway
Source: eLife journal article supplement (doi:10.7554/elife.63538), 2021-01-26
Supplement: supp [file elife-63538-supp-v1.zip › elife_poa_e63538_Figure_1_figure_supplement_1.pdf]

# Figure 1-figure supplement 1.

## Non-amyloid induced groups

Distilled water

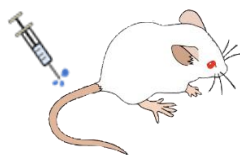

R1.P1-*Apoa2*<sup>c</sup> congenic mice  
(female, 8-week-old)

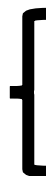

Con

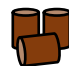

MF diet

Cur

(Curcumin diet)

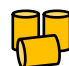

2% w/w Cur diet

8 weeks      12 weeks

analysis

## Amyloid induced groups

AApoAII fibrils  
1 µg/mouse

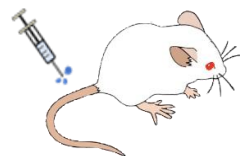

R1.P1-*Apoa2*<sup>c</sup> congenic mice  
(female, 8-week-old)

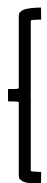

A-NT  
(Induction)

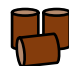

MF diet

A-Cur

(Induction + Cur)

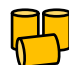

2% w/w Cur diet

8 weeks      12 weeks

analysis
