# Supplementary material for: Curcumin promotes AApoAII amyloidosis and peroxisome proliferation in mice by activating the PPARα signaling pathway
Source: eLife journal article supplement (doi:10.7554/elife.63538), 2021-01-26
Supplement: supp [file elife-63538-supp-v1.zip › elife_poa_e63538_Figure_3_source_data_1.xls]

## Sheet: Supplementary File 1. CurvsCon.
Gene_id	readcount_Cur	readcount_Con	log2.Fold_change.	pvalue	qvalue	Gene name	Gene description
ENSMUSG00000002265	38.1894	3.08195	3.6313	2.32e-09	1.56e-07	Peg3	paternally expressed 3 [Source:MGI Symbol;Acc:MGI:104748]
ENSMUSG00000002346	127.062	59.0117	1.1065	8.32e-08	4.75e-06	Slc25a42	solute carrier family 25, member 42 [Source:MGI Symbol;Acc:MGI:1920345]
ENSMUSG00000002944	283.512	82.0505	1.7888	2.45e-29	4.66e-27	Cd36	CD36 molecule [Source:MGI Symbol;Acc:MGI:107899]
ENSMUSG00000003526	91.7051	349.018	-1.9282	3.32e-34	7.09e-32	Prodh	proline dehydrogenase [Source:MGI Symbol;Acc:MGI:97770]
ENSMUSG00000003555	104.401	327.444	-1.6491	5.87e-26	9.58e-24	Cyp17a1	cytochrome P450, family 17, subfamily a, polypeptide 1 [Source:MGI Symbol;Acc:MGI:88586]
ENSMUSG00000003623	1268.49	256.711	2.3049	4.27e-170	5.68e-167	Crot	carnitine O-octanoyltransferase [Source:MGI Symbol;Acc:MGI:1921364]
ENSMUSG00000003721	156.855	76.5939	1.0341	1.52e-08	9.46e-07	Insig2	insulin induced gene 2 [Source:MGI Symbol;Acc:MGI:1920249]
ENSMUSG00000004552	97.6232	14.0961	2.7919	1.34e-17	1.51e-15	Ctse	cathepsin E [Source:MGI Symbol;Acc:MGI:107361]
ENSMUSG00000004951	67.6281	12.7825	2.4035	5.01e-11	3.8e-09	Hspb1	heat shock protein 1 [Source:MGI Symbol;Acc:MGI:96240]
ENSMUSG00000005089	63.1263	134.646	-1.0929	1.42e-06	6.83e-05	Slc1a2	solute carrier family 1 (glial high affinity glutamate transporter), member 2 [Source:MGI Symbol;Acc:MGI:101931]
ENSMUSG00000005125	32.5748	4.39556	2.8896	5.27e-07	2.69e-05	Ndrg1	N-myc downstream regulated gene 1 [Source:MGI Symbol;Acc:MGI:1341799]
ENSMUSG00000005483	83.966	40.7726	1.0422	3.11e-05	0.0011743	Dnajb1	DnaJ heat shock protein family (Hsp40) member B1 [Source:MGI Symbol;Acc:MGI:1931874]
ENSMUSG00000005547	354.023	1770.1	-2.3219	3.17e-212	4.61e-209	Cyp2a5	cytochrome P450, family 2, subfamily a, polypeptide 5 [Source:MGI Symbol;Acc:MGI:88597]
ENSMUSG00000006362	24.9369	1.51571	4.0402	5.91e-07	2.96e-05	Cbfa2t3	core-binding factor, runt domain, alpha subunit 2, translocated to, 3 (human) [Source:MGI Symbol;Acc:MGI:1338013]
ENSMUSG00000006777	54.6791	10.3574	2.4003	3.55e-09	2.33e-07	Krt23	keratin 23 [Source:MGI Symbol;Acc:MGI:2148866]
ENSMUSG00000008153	28.073	1.97042	3.8326	1.84e-07	9.88e-06	Clstn3	calsyntenin 3 [Source:MGI Symbol;Acc:MGI:2178323]
ENSMUSG00000010175	66.0094	132.524	-1.0055	8.9e-06	0.00037368	Prox1	prospero homeobox 1 [Source:MGI Symbol;Acc:MGI:97772]
ENSMUSG00000010651	4948.58	1191.55	2.0542	0	0	Acaa1b	acetyl-Coenzyme A acyltransferase 1B [Source:MGI Symbol;Acc:MGI:3605455]
ENSMUSG00000015357	355.49	127.774	1.4762	2.06e-28	3.73e-26	Clpx	caseinolytic mitochondrial matrix peptidase chaperone subunit [Source:MGI Symbol;Acc:MGI:1346017]
ENSMUSG00000015568	139.151	5.9618	4.5448	6.74e-34	1.42e-31	Lpl	lipoprotein lipase [Source:MGI Symbol;Acc:MGI:96820]
ENSMUSG00000017754	21.8514	3.23352	2.7565	5.94e-05	0.0021306	Pltp	phospholipid transfer protein [Source:MGI Symbol;Acc:MGI:103151]
ENSMUSG00000017868	96.0551	47.5933	1.0131	1.3e-05	0.00053065	Sgk2	serum/glucocorticoid regulated kinase 2 [Source:MGI Symbol;Acc:MGI:1351318]
ENSMUSG00000018796	1759.49	612.751	1.5218	2.16e-139	2.16e-136	Acsl1	acyl-CoA synthetase long-chain family member 1 [Source:MGI Symbol;Acc:MGI:102797]
ENSMUSG00000019577	44.3604	8.08379	2.4562	7.22e-08	4.15e-06	Pdk4	pyruvate dehydrogenase kinase, isoenzyme 4 [Source:MGI Symbol;Acc:MGI:1351481]
ENSMUSG00000019768	14.6182	63.7104	-2.1238	2.61e-08	1.6e-06	Esr1	estrogen receptor 1 (alpha) [Source:MGI Symbol;Acc:MGI:1352467]
ENSMUSG00000020553	148.863	52.1405	1.5135	3.35e-13	2.93e-11	Pctp	phosphatidylcholine transfer protein [Source:MGI Symbol;Acc:MGI:107375]
ENSMUSG00000020572	36.3684	119.893	-1.721	4.62e-11	3.52e-09	Nampt	nicotinamide phosphoribosyltransferase [Source:MGI Symbol;Acc:MGI:1929865]
ENSMUSG00000020733	185.535	399.895	-1.1079	4.09e-17	4.45e-15	Slc9a3r1	solute carrier family 9 (sodium/hydrogen exchanger), member 3 regulator 1 [Source:MGI Symbol;Acc:MGI:1349482]
ENSMUSG00000020777	4869.88	1803.49	1.4331	0	0	Acox1	acyl-Coenzyme A oxidase 1, palmitoyl [Source:MGI Symbol;Acc:MGI:1330812]
ENSMUSG00000020889	92.4132	16.6223	2.475	5.91e-15	5.63e-13	Nr1d1	nuclear receptor subfamily 1, group D, member 1 [Source:MGI Symbol;Acc:MGI:2444210]
ENSMUSG00000020926	132.98	31.4257	2.0812	2.39e-17	2.66e-15	Adam11	a disintegrin and metallopeptidase domain 11 [Source:MGI Symbol;Acc:MGI:1098667]
ENSMUSG00000021226	123.521	16.3192	2.9201	9.54e-23	1.39e-20	Acot2	acyl-CoA thioesterase 2 [Source:MGI Symbol;Acc:MGI:2159605]
ENSMUSG00000021539	117.502	286.975	-1.2882	5.36e-16	5.39e-14	Lect2	leukocyte cell-derived chemotaxin 2 [Source:MGI Symbol;Acc:MGI:1278342]
ENSMUSG00000021670	30.0457	98.6223	-1.7148	2.62e-09	1.75e-07	Hmgcr	3-hydroxy-3-methylglutaryl-Coenzyme A reductase [Source:MGI Symbol;Acc:MGI:96159]
ENSMUSG00000021792	169.753	79.6759	1.0912	8.72e-10	6.23e-08	Fam213a	family with sequence similarity 213, member A [Source:MGI Symbol;Acc:MGI:1917814]
ENSMUSG00000021876	777.445	1655.91	-1.0908	5.36e-64	2.52e-61	Rnase4	ribonuclease, RNase A family 4 [Source:MGI Symbol;Acc:MGI:1926217]
ENSMUSG00000022003	22.3572	2.42514	3.2046	1.34e-05	0.00054144	Slc25a30	solute carrier family 25, member 30 [Source:MGI Symbol;Acc:MGI:1914804]
ENSMUSG00000022010	49.8232	123.935	-1.3147	6.12e-08	3.55e-06	Tsc22d1	TSC22 domain family, member 1 [Source:MGI Symbol;Acc:MGI:109127]
ENSMUSG00000022215	20.8903	2.27357	3.1998	2.6e-05	0.0010042	Fitm1	fat storage-inducing transmembrane protein 1 [Source:MGI Symbol;Acc:MGI:1915930]
ENSMUSG00000022347	53.3134	393.276	-2.883	6.66e-62	3.04e-59	A1bg	alpha-1-B glycoprotein [Source:MGI Symbol;Acc:MGI:2152878]
ENSMUSG00000022550	46.7377	11.5699	2.0142	8.51e-07	4.17e-05	Adck5	aarF domain containing kinase 5 [Source:MGI Symbol;Acc:MGI:2679274]
ENSMUSG00000022615	142.439	62.0936	1.1978	1.74e-09	1.2e-07	Tymp	thymidine phosphorylase [Source:MGI Symbol;Acc:MGI:1920212]
ENSMUSG00000022797	31.462	100.239	-1.6718	3.87e-09	2.53e-07	Tfrc	transferrin receptor [Source:MGI Symbol;Acc:MGI:98822]
ENSMUSG00000022853	5348.53	461.079	3.5361	0	0	Ehhadh	enoyl-Coenzyme A, hydratase/3-hydroxyacyl Coenzyme A dehydrogenase [Source:MGI Symbol;Acc:MGI:1277964]
ENSMUSG00000022951	24.8863	72.7036	-1.5467	2.29e-06	0.00010621	Rcan1	regulator of calcineurin 1 [Source:MGI Symbol;Acc:MGI:1890564]
ENSMUSG00000023019	373.649	172.033	1.119	1.86e-20	2.44e-18	Gpd1	glycerol-3-phosphate dehydrogenase 1 (soluble) [Source:MGI Symbol;Acc:MGI:95679]
ENSMUSG00000023044	216.541	14.1972	3.931	2.85e-48	8.59e-46	Csad	cysteine sulfinic acid decarboxylase [Source:MGI Symbol;Acc:MGI:2180098]
ENSMUSG00000023087	50.5819	142.275	-1.492	1.3e-10	9.67e-09	Noct	nocturnin [Source:MGI Symbol;Acc:MGI:109382]
ENSMUSG00000023232	50.4302	6.46703	2.9631	2.69e-10	1.97e-08	Serinc2	serine incorporator 2 [Source:MGI Symbol;Acc:MGI:1919132]
ENSMUSG00000023262	53.1616	118.428	-1.1555	2.07e-06	9.61e-05	Acy1	aminoacylase 1 [Source:MGI Symbol;Acc:MGI:87913]
ENSMUSG00000023963	18.9682	93.5699	-2.3025	1.18e-12	9.81e-11	Cyp39a1	cytochrome P450, family 39, subfamily a, polypeptide 1 [Source:MGI Symbol;Acc:MGI:1927096]
ENSMUSG00000024066	43.5005	98.016	-1.172	1.24e-05	0.00050681	Xdh	xanthine dehydrogenase [Source:MGI Symbol;Acc:MGI:98973]
ENSMUSG00000024132	406.881	203.408	1.0002	6.26e-19	7.76e-17	Eci1	enoyl-Coenzyme A delta isomerase 1 [Source:MGI Symbol;Acc:MGI:94871]
ENSMUSG00000024580	81.6393	37.5391	1.1209	1.44e-05	0.00057579	Grpel2	GrpE-like 2, mitochondrial [Source:MGI Symbol;Acc:MGI:1334416]
ENSMUSG00000024694	126	43.9051	1.521	1.82e-11	1.41e-09	Keg1	kidney expressed gene 1 [Source:MGI Symbol;Acc:MGI:1928492]
ENSMUSG00000024843	57.4611	18.9464	1.6007	2.6e-06	0.00011981	Chka	choline kinase alpha [Source:MGI Symbol;Acc:MGI:107760]
ENSMUSG00000024987	40.0609	110.142	-1.4591	2.76e-08	1.69e-06	Cyp26a1	cytochrome P450, family 26, subfamily a, polypeptide 1 [Source:MGI Symbol;Acc:MGI:1096359]
ENSMUSG00000025004	16.4897	149.853	-3.1839	4.9e-27	8.43e-25	Cyp2c40	cytochrome P450, family 2, subfamily c, polypeptide 40 [Source:MGI Symbol;Acc:MGI:1306815]
ENSMUSG00000025492	143.046	302.435	-1.0801	8.52e-13	7.2e-11	Ifitm3	interferon induced transmembrane protein 3 [Source:MGI Symbol;Acc:MGI:1913391]
ENSMUSG00000025504	38.4929	7.17436	2.4237	6.35e-07	3.16e-05	Eps8l2	EPS8-like 2 [Source:MGI Symbol;Acc:MGI:2138828]
ENSMUSG00000025533	335.409	880.123	-1.3918	1.13e-51	4e-49	Asl	argininosuccinate lyase [Source:MGI Symbol;Acc:MGI:88084]
ENSMUSG00000025813	25.7968	84.8293	-1.7174	3.23e-08	1.96e-06	Homer2	homer scaffolding protein 2 [Source:MGI Symbol;Acc:MGI:1347354]
ENSMUSG00000025981	22.1043	60.0727	-1.4424	4.79e-05	0.0017499	Coq10b	coenzyme Q10B [Source:MGI Symbol;Acc:MGI:1915126]
ENSMUSG00000026348	25.4427	77.2507	-1.6023	5.55e-07	2.8e-05	Acmsd	amino carboxymuconate semialdehyde decarboxylase [Source:MGI Symbol;Acc:MGI:2386323]
ENSMUSG00000026691	0	208.612	-8.84	4.45e-41	1.11e-38	Fmo3	flavin containing monooxygenase 3 [Source:MGI Symbol;Acc:MGI:1100496]
ENSMUSG00000026839	149.267	545.454	-1.8696	2.61e-50	8.71e-48	Upp2	uridine phosphorylase 2 [Source:MGI Symbol;Acc:MGI:1923904]
ENSMUSG00000026853	154.73	61.3358	1.335	1.12e-11	8.78e-10	Crat	carnitine acetyltransferase [Source:MGI Symbol;Acc:MGI:109501]
ENSMUSG00000027227	734.956	1470.39	-1.0005	3.72e-49	1.17e-46	Sord	sorbitol dehydrogenase [Source:MGI Symbol;Acc:MGI:98266]
ENSMUSG00000027533	78.0985	12.1762	2.6812	7.14e-14	6.48e-12	Fabp5	fatty acid binding protein 5, epidermal [Source:MGI Symbol;Acc:MGI:101790]
ENSMUSG00000027597	737.94	1496.82	-1.0203	9.73e-52	3.53e-49	Ahcy	S-adenosylhomocysteine hydrolase [Source:MGI Symbol;Acc:MGI:87968]
ENSMUSG00000027809	464.039	229.378	1.0165	7.34e-22	1.01e-19	Etfdh	electron transferring flavoprotein, dehydrogenase [Source:MGI Symbol;Acc:MGI:106100]
ENSMUSG00000027870	84.7248	40.2674	1.0732	1.89e-05	0.00074665	Hao2	hydroxyacid oxidase 2 [Source:MGI Symbol;Acc:MGI:96012]
ENSMUSG00000027890	94.9929	42.541	1.159	1.61e-06	7.57e-05	Gstm4	glutathione S-transferase, mu 4 [Source:MGI Symbol;Acc:MGI:95862]
ENSMUSG00000028150	27.9212	92.9131	-1.7345	5.59e-09	3.59e-07	Rorc	RAR-related orphan receptor gamma [Source:MGI Symbol;Acc:MGI:104856]
ENSMUSG00000028240	71.0171	585.974	-3.0446	1.93e-96	1.47e-93	Cyp7a1	cytochrome P450, family 7, subfamily a, polypeptide 1 [Source:MGI Symbol;Acc:MGI:106091]
ENSMUSG00000028359	2.83259	23.4935	-3.0521	2.95e-05	0.0011233	Orm3	orosomucoid 3 [Source:MGI Symbol;Acc:MGI:97445]
ENSMUSG00000028383	257.614	118.882	1.1157	1.59e-14	1.48e-12	Hsdl2	hydroxysteroid dehydrogenase like 2 [Source:MGI Symbol;Acc:MGI:1919729]
ENSMUSG00000028494	781.592	215.585	1.8582	1.19e-81	7.07e-79	Plin2	perilipin 2 [Source:MGI Symbol;Acc:MGI:87920]
ENSMUSG00000028712	209.258	26.3734	2.9881	3.7e-38	8.46e-36	Cyp4a31	cytochrome P450, family 4, subfamily a, polypeptide 31 [Source:MGI Symbol;Acc:MGI:3028580]
ENSMUSG00000028715	6595.78	842.988	2.968	0	0	Cyp4a14	cytochrome P450, family 4, subfamily a, polypeptide 14 [Source:MGI Symbol;Acc:MGI:1096550]
ENSMUSG00000029273	140.466	349.119	-1.3135	1.06e-19	1.35e-17	Sult1d1	sulfotransferase family 1D, member 1 [Source:MGI Symbol;Acc:MGI:1926341]
ENSMUSG00000029311	771.324	291.471	1.404	1.08e-55	4.32e-53	Hsd17b11	hydroxysteroid (17-beta) dehydrogenase 11 [Source:MGI Symbol;Acc:MGI:2149821]
ENSMUSG00000029650	34.0416	102.058	-1.584	1.17e-08	7.41e-07	Slc46a3	solute carrier family 46, member 3 [Source:MGI Symbol;Acc:MGI:1918956]
ENSMUSG00000029664	79.1607	36.9328	1.0999	2.53e-05	0.00098123	Tfpi2	tissue factor pathway inhibitor 2 [Source:MGI Symbol;Acc:MGI:108543]
ENSMUSG00000030237	61.3053	146.418	-1.256	1.46e-08	9.15e-07	Slco1a4	solute carrier organic anion transporter family, member 1a4 [Source:MGI Symbol;Acc:MGI:1351896]
ENSMUSG00000030342	30.6021	6.46703	2.2425	2.15e-05	0.00084157	Cd9	CD9 antigen [Source:MGI Symbol;Acc:MGI:88348]
ENSMUSG00000030545	210.674	79.1706	1.412	1.61e-16	1.66e-14	Pex11a	peroxisomal biogenesis factor 11 alpha [Source:MGI Symbol;Acc:MGI:1338788]
ENSMUSG00000030711	315.429	687.779	-1.1246	5.37e-29	9.99e-27	Sult1a1	sulfotransferase family 1A, phenol-preferring, member 1 [Source:MGI Symbol;Acc:MGI:102896]
ENSMUSG00000030934	484.474	1116.52	-1.2045	1.44e-51	5.02e-49	Oat	ornithine aminotransferase [Source:MGI Symbol;Acc:MGI:97394]
ENSMUSG00000031271	80.6276	10.0542	3.0035	9.33e-16	9.26e-14	Serpina7	serine (or cysteine) peptidase inhibitor, clade A (alpha-1 antiproteinase, antitrypsin), member 7 [Source:MGI Symbol;Acc:MGI:3041197]
ENSMUSG00000031700	203.744	431.927	-1.084	9.89e-18	1.13e-15	Gpt2	glutamic pyruvate transaminase (alanine aminotransferase) 2 [Source:MGI Symbol;Acc:MGI:1915391]
ENSMUSG00000031765	151.544	465.172	-1.618	3.43e-35	7.5e-33	Mt1	metallothionein 1 [Source:MGI Symbol;Acc:MGI:97171]
ENSMUSG00000031808	57.0564	6.66913	3.0968	7.22e-12	5.83e-10	Slc27a1	solute carrier family 27 (fatty acid transporter), member 1 [Source:MGI Symbol;Acc:MGI:1347098]
ENSMUSG00000032010	11.8362	73.0573	-2.6258	1.06e-11	8.4e-10	Usp2	ubiquitin specific peptidase 2 [Source:MGI Symbol;Acc:MGI:1858178]
ENSMUSG00000032080	17.5519	66.5397	-1.9226	1.08e-07	6.07e-06	Apoa4	apolipoprotein A-IV [Source:MGI Symbol;Acc:MGI:88051]
ENSMUSG00000032114	105.767	274.899	-1.378	5.17e-17	5.54e-15	Slc37a4	solute carrier family 37 (glucose-6-phosphate transporter), member 4 [Source:MGI Symbol;Acc:MGI:1316650]
ENSMUSG00000032261	78.7055	34.2551	1.2001	7.42e-06	0.00031872	Sh3bgrl2	SH3 domain binding glutamic acid-rich protein like 2 [Source:MGI Symbol;Acc:MGI:1915350]
ENSMUSG00000032271	7.53671	231.045	-4.9381	1.2e-53	4.56e-51	Nnmt	nicotinamide N-methyltransferase [Source:MGI Symbol;Acc:MGI:1099443]
ENSMUSG00000032310	278.909	570.059	-1.0313	4.25e-21	5.71e-19	Cyp1a2	cytochrome P450, family 1, subfamily a, polypeptide 2 [Source:MGI Symbol;Acc:MGI:88589]
ENSMUSG00000032349	981.796	358.769	1.4524	9.25e-74	4.93e-71	Elovl5	ELOVL family member 5, elongation of long chain fatty acids (yeast) [Source:MGI Symbol;Acc:MGI:1916051]
ENSMUSG00000032392	37.7847	95.7929	-1.3421	1.28e-06	6.17e-05	Parp16	poly (ADP-ribose) polymerase family, member 16 [Source:MGI Symbol;Acc:MGI:2446133]
ENSMUSG00000032607	99.1406	43.2483	1.1968	5.18e-07	2.66e-05	Amt	aminomethyltransferase [Source:MGI Symbol;Acc:MGI:3646700]
ENSMUSG00000032898	164.644	46.3808	1.8278	3.63e-18	4.3e-16	Fbxo21	F-box protein 21 [Source:MGI Symbol;Acc:MGI:1924223]
ENSMUSG00000032902	100.304	34.9119	1.5226	1.97e-09	1.35e-07	Slc16a1	solute carrier family 16 (monocarboxylic acid transporters), member 1 [Source:MGI Symbol;Acc:MGI:106013]
ENSMUSG00000033863	69.449	25.2113	1.4619	1.22e-06	5.89e-05	Klf9	Kruppel-like factor 9 [Source:MGI Symbol;Acc:MGI:1333856]
ENSMUSG00000034450	260.396	616.389	-1.2431	9.62e-31	1.9e-28	Gulo	gulonolactone (L-) oxidase [Source:MGI Symbol;Acc:MGI:1353434]
ENSMUSG00000034785	97.1679	207.551	-1.0949	2.02e-09	1.37e-07	Dio1	deiodinase, iodothyronine, type I [Source:MGI Symbol;Acc:MGI:94896]
ENSMUSG00000034917	47.547	16.2181	1.5517	2.85e-05	0.0010884	Tjp3	tight junction protein 3 [Source:MGI Symbol;Acc:MGI:1351650]
ENSMUSG00000035637	338.747	134.039	1.3376	8.1e-24	1.24e-21	Grhpr	glyoxylate reductase/hydroxypyruvate reductase [Source:MGI Symbol;Acc:MGI:1923488]
ENSMUSG00000035686	130.4	1662.23	-3.6721	0	0	Thrsp	thyroid hormone responsive [Source:MGI Symbol;Acc:MGI:109126]
ENSMUSG00000037071	7050.06	2683.52	1.3935	0	0	Scd1	stearoyl-Coenzyme A desaturase 1 [Source:MGI Symbol;Acc:MGI:98239]
ENSMUSG00000037379	27.0613	0	4.8951	5.98e-08	3.49e-06	Spon2	spondin 2, extracellular matrix protein [Source:MGI Symbol;Acc:MGI:1923724]
ENSMUSG00000037440	164.897	6.97227	4.5638	6.48e-40	1.55e-37	Vnn1	vanin 1 [Source:MGI Symbol;Acc:MGI:108395]
ENSMUSG00000038055	20.081	57.0918	-1.5074	4.05e-05	0.0014929	Dexi	dexamethasone-induced transcript [Source:MGI Symbol;Acc:MGI:1926236]
ENSMUSG00000038393	84.1684	35.0129	1.2654	1.45e-06	6.88e-05	Txnip	thioredoxin interacting protein [Source:MGI Symbol;Acc:MGI:1889549]
ENSMUSG00000038656	14.517	263.582	-4.1824	1.17e-56	4.82e-54	Cyp3a16	cytochrome P450, family 3, subfamily a, polypeptide 16 [Source:MGI Symbol;Acc:MGI:106099]
ENSMUSG00000038776	578.354	241.554	1.2596	2.42e-36	5.38e-34	Ephx1	epoxide hydrolase 1, microsomal [Source:MGI Symbol;Acc:MGI:95405]
ENSMUSG00000039196	173.496	476.792	-1.4585	6.83e-31	1.37e-28	Orm1	orosomucoid 1 [Source:MGI Symbol;Acc:MGI:97443]
ENSMUSG00000039878	29.4893	3.33456	3.1446	7.05e-07	3.48e-05	Slc39a5	solute carrier family 39 (metal ion transporter), member 5 [Source:MGI Symbol;Acc:MGI:1919336]
ENSMUSG00000040170	30.7538	86.4966	-1.4919	5.42e-07	2.75e-05	Fmo2	flavin containing monooxygenase 2 [Source:MGI Symbol;Acc:MGI:1916776]
ENSMUSG00000041417	50.3796	109.889	-1.1251	7.9e-06	0.00033748	Pik3r1	phosphoinositide-3-kinase regulatory subunit 1 [Source:MGI Symbol;Acc:MGI:97583]
ENSMUSG00000041798	95.5999	288.389	-1.5929	5.98e-22	8.32e-20	Gck	glucokinase [Source:MGI Symbol;Acc:MGI:1270854]
ENSMUSG00000042129	25.3416	4.95132	2.3556	6.97e-05	0.0024618	Rassf4	Ras association (RalGDS/AF-6) domain family member 4 [Source:MGI Symbol;Acc:MGI:2386853]
ENSMUSG00000042248	91.4016	213.109	-1.2213	2.45e-11	1.88e-09	Cyp2c37	cytochrome P450, family 2. subfamily c, polypeptide 37 [Source:MGI Symbol;Acc:MGI:1306806]
ENSMUSG00000044005	267.477	554.043	-1.0506	3.48e-21	4.72e-19	Gls2	glutaminase 2 (liver, mitochondrial) [Source:MGI Symbol;Acc:MGI:2143539]
ENSMUSG00000044734	61.103	17.2286	1.8264	1.21e-07	6.79e-06	Serpinb1a	serine (or cysteine) peptidase inhibitor, clade B, member 1a [Source:MGI Symbol;Acc:MGI:1913472]
ENSMUSG00000045672	8.24486	40.8231	-2.3078	2.58e-06	0.00011919	Col27a1	collagen, type XXVII, alpha 1 [Source:MGI Symbol;Acc:MGI:2672118]
ENSMUSG00000045776	1.21397	21.0179	-4.1138	8.32e-06	0.00035286	Lrtm1	leucine-rich repeats and transmembrane domains 1 [Source:MGI Symbol;Acc:MGI:2442106]
ENSMUSG00000046179	20.4351	2.67776	2.932	6.32e-05	0.0022571	E2f8	E2F transcription factor 8 [Source:MGI Symbol;Acc:MGI:1922038]
ENSMUSG00000046794	95.2964	321.28	-1.7533	8.68e-28	1.54e-25	Ppp1r3b	protein phosphatase 1, regulatory (inhibitor) subunit 3B [Source:MGI Symbol;Acc:MGI:2177268]
ENSMUSG00000047822	57.714	181.38	-1.652	4.1e-15	3.97e-13	Angptl8	angiopoietin-like 8 [Source:MGI Symbol;Acc:MGI:3643534]
ENSMUSG00000047866	547.853	235.289	1.2194	5.46e-33	1.12e-30	Lonp2	lon peptidase 2, peroxisomal [Source:MGI Symbol;Acc:MGI:1914137]
ENSMUSG00000048087	689.938	1578.71	-1.1942	3.72e-71	1.92e-68	Gm4737	predicted gene 4737 [Source:MGI Symbol;Acc:MGI:3643647]
ENSMUSG00000048108	70.4606	29.7079	1.246	1.31e-05	0.00053261	Tmem72	transmembrane protein 72 [Source:MGI Symbol;Acc:MGI:2442707]
ENSMUSG00000049580	16.8944	211.997	-3.6494	5.27e-42	1.34e-39	Tsku	tsukushi, small leucine rich proteoglycan [Source:MGI Symbol;Acc:MGI:2443855]
ENSMUSG00000051748	326.962	783.572	-1.2609	1.62e-39	3.8e-37	Wfdc21	WAP four-disulfide core domain 21 [Source:MGI Symbol;Acc:MGI:1913357]
ENSMUSG00000052040	24.4311	62.8515	-1.3632	7.1e-05	0.0024998	Klf13	Kruppel-like factor 13 [Source:MGI Symbol;Acc:MGI:1354948]
ENSMUSG00000053168	13.8595	79.1201	-2.5132	5.34e-12	4.34e-10	9030619P08Rik	RIKEN cDNA 9030619P08 gene [Source:MGI Symbol;Acc:MGI:3612405]
ENSMUSG00000054417	3.6419	125.652	-5.1086	3.06e-30	5.89e-28	Cyp3a44	cytochrome P450, family 3, subfamily a, polypeptide 44 [Source:MGI Symbol;Acc:MGI:2449818]
ENSMUSG00000054422	9015.68	3140.5	1.5214	0	0	Fabp1	fatty acid binding protein 1, liver [Source:MGI Symbol;Acc:MGI:95479]
ENSMUSG00000055254	1.77037	23.8977	-3.7548	4.06e-06	0.00018215	Ntrk2	neurotrophic tyrosine kinase, receptor, type 2 [Source:MGI Symbol;Acc:MGI:97384]
ENSMUSG00000055866	16.3886	52.6962	-1.685	1.74e-05	0.00069102	Per2	period circadian clock 2 [Source:MGI Symbol;Acc:MGI:1195265]
ENSMUSG00000056091	70.7136	141.719	-1.003	4.58e-06	0.0002038	St3gal5	ST3 beta-galactoside alpha-2,3-sialyltransferase 5 [Source:MGI Symbol;Acc:MGI:1339963]
ENSMUSG00000056429	270.866	122.065	1.1499	7.96e-16	7.95e-14	Tgoln1	trans-golgi network protein [Source:MGI Symbol;Acc:MGI:105080]
ENSMUSG00000056666	1192.32	245.444	2.2803	4.56e-158	5.21e-155	Retsat	retinol saturase (all trans retinol 13,14 reductase) [Source:MGI Symbol;Acc:MGI:1914692]
ENSMUSG00000056978	9.50941	45.0166	-2.243	1.24e-06	6.01e-05	Hamp2	hepcidin antimicrobial peptide 2 [Source:MGI Symbol;Acc:MGI:2153530]
ENSMUSG00000057465	7.23322	68.1059	-3.2351	2.61e-13	2.31e-11	Saa2	serum amyloid A 2 [Source:MGI Symbol;Acc:MGI:98222]
ENSMUSG00000058997	301.62	147.226	1.0347	4.12e-15	3.97e-13	Vwa8	von Willebrand factor A domain containing 8 [Source:MGI Symbol;Acc:MGI:1919008]
ENSMUSG00000060613	490.746	1040.99	-1.0849	1.66e-40	4.09e-38	Cyp2c70	cytochrome P450, family 2, subfamily c, polypeptide 70 [Source:MGI Symbol;Acc:MGI:2385878]
ENSMUSG00000060807	568.895	1305.13	-1.198	1.93e-59	8.13e-57	Serpina6	serine (or cysteine) peptidase inhibitor, clade A, member 6 [Source:MGI Symbol;Acc:MGI:88278]
ENSMUSG00000061292	33.7382	94.6814	-1.4887	1.66e-07	9.06e-06	Cyp3a59	cytochrome P450, family 3, subfamily a, polypeptide 59 [Source:MGI Symbol;Acc:MGI:3769707]
ENSMUSG00000061906	13.8595	0	5.0997	9.72e-05	0.0033918	Ugt2b38	UDP glucuronosyltransferase 2 family, polypeptide B38 [Source:MGI Symbol;Acc:MGI:2140794]
ENSMUSG00000063929	55.3872	13.0856	2.0816	4.53e-08	2.66e-06	Cyp4a32	cytochrome P450, family 4, subfamily a, polypeptide 32 [Source:MGI Symbol;Acc:MGI:3717148]
ENSMUSG00000066071	137.836	0	9.0918	1.06e-27	1.86e-25	Cyp4a12a	cytochrome P450, family 4, subfamily a, polypeptide 12a [Source:MGI Symbol;Acc:MGI:88612]
ENSMUSG00000066072	3692.58	659.637	2.4849	0	0	Cyp4a10	cytochrome P450, family 4, subfamily a, polypeptide 10 [Source:MGI Symbol;Acc:MGI:88611]
ENSMUSG00000066366	914.623	3000.15	-1.7138	1.06e-236	1.7e-233	Serpina1a	serine (or cysteine) peptidase inhibitor, clade A, member 1A [Source:MGI Symbol;Acc:MGI:891971]
ENSMUSG00000067071	48.4575	121.762	-1.3293	6.07e-08	3.53e-06	Hes6	hairy and enhancer of split 6 [Source:MGI Symbol;Acc:MGI:1859852]
ENSMUSG00000067144	21.5985	71.1879	-1.7207	3.95e-07	2.04e-05	Slc22a7	solute carrier family 22 (organic anion transporter), member 7 [Source:MGI Symbol;Acc:MGI:1859559]
ENSMUSG00000067279	56.6012	20.8663	1.4397	1.46e-05	0.00058498	Ppp1r3c	protein phosphatase 1, regulatory (inhibitor) subunit 3C [Source:MGI Symbol;Acc:MGI:1858229]
ENSMUSG00000068083	57.6634	129.038	-1.1621	6.4e-07	3.17e-05	Cyp2d40	cytochrome P450, family 2, subfamily d, polypeptide 40 [Source:MGI Symbol;Acc:MGI:1919004]
ENSMUSG00000068246	12.2914	58.9612	-2.2621	2.42e-08	1.49e-06	Apol9b	apolipoprotein L 9b [Source:MGI Symbol;Acc:MGI:1919148]
ENSMUSG00000069668	9.20591	57.0918	-2.6327	1.76e-09	1.21e-07	Sult3a1	sulfotransferase family 3A, member 1 [Source:MGI Symbol;Acc:MGI:1931469]
ENSMUSG00000070811	59.3326	182.845	-1.6237	7.21e-15	6.82e-13	Sult2a2	sulfotransferase family 2A, dehydroepiandrosterone (DHEA)-preferring, member 2 [Source:MGI Symbol;Acc:MGI:107550]
ENSMUSG00000071633	352.506	69.369	2.3453	1.52e-49	4.89e-47	Gm4952	predicted gene 4952 [Source:MGI Symbol;Acc:MGI:3643569]
ENSMUSG00000072949	610.777	121.712	2.3272	8.67e-84	5.33e-81	Acot1	acyl-CoA thioesterase 1 [Source:MGI Symbol;Acc:MGI:1349396]
ENSMUSG00000073842	141.579	48.5027	1.5455	5.91e-13	5.06e-11	Mup7	major urinary protein 7 [Source:MGI Symbol;Acc:MGI:3709615]
ENSMUSG00000074115	18.9176	110.697	-2.5488	1.95e-16	2e-14	Saa1	serum amyloid A 1 [Source:MGI Symbol;Acc:MGI:98221]
ENSMUSG00000074254	763.636	1675.06	-1.1333	4.77e-69	2.31e-66	Cyp2a4	cytochrome P450, family 2, subfamily a, polypeptide 4 [Source:MGI Symbol;Acc:MGI:88596]
ENSMUSG00000074398	31.1079	0	6.0962	4.61e-09	2.99e-07	Gm15441	predicted gene 15441 [Source:MGI Symbol;Acc:MGI:3641753]
ENSMUSG00000074768	2176.49	4583.46	-1.0744	1.48e-169	1.82e-166	Bhmt	betaine-homocysteine methyltransferase [Source:MGI Symbol;Acc:MGI:1339972]
ENSMUSG00000075551	53.7686	390.043	-2.8588	6.98e-61	3.01e-58	Cyp3a41a	cytochrome P450, family 3, subfamily a, polypeptide 41A [Source:MGI Symbol;Acc:MGI:1858451]
ENSMUSG00000076435	296.663	126.764	1.2267	9.37e-19	1.15e-16	Acsf2	acyl-CoA synthetase family member 2 [Source:MGI Symbol;Acc:MGI:2388287]
ENSMUSG00000078234	52.7064	21.5736	1.2887	0.00011178	0.003867	Klhdc7a	kelch domain containing 7A [Source:MGI Symbol;Acc:MGI:2444612]
ENSMUSG00000078673	812.397	347.249	1.2262	1.78e-48	5.49e-46	Mup19	major urinary protein 19 [Source:MGI Symbol;Acc:MGI:3705235]
ENSMUSG00000078680	5750.46	2470.51	1.2189	0	0	Mup10	major urinary protein 10 [Source:MGI Symbol;Acc:MGI:1924164]
ENSMUSG00000078798	94.3859	660.951	-2.8079	5.62e-100	4.49e-97	Sult2a1	sulfotransferase family 2A, dehydroepiandrosterone (DHEA)-preferring, member 1 [Source:MGI Symbol;Acc:MGI:98430]
ENSMUSG00000078799	32.1701	159.15	-2.3066	1.69e-20	2.25e-18	Sult2a5	sulfotransferase family 2A, dehydroepiandrosterone (DHEA)-preferring, member 5 [Source:MGI Symbol;Acc:MGI:3648378]
ENSMUSG00000078817	71.8769	7.6796	3.2264	4.92e-15	4.71e-13	Nlrp12	NLR family, pyrin domain containing 12 [Source:MGI Symbol;Acc:MGI:2676630]
ENSMUSG00000078964	248.56	720.569	-1.5355	1.53e-49	4.89e-47	Ces1b	carboxylesterase 1B [Source:MGI Symbol;Acc:MGI:3779470]
ENSMUSG00000079012	58.5233	147.58	-1.3344	2.2e-09	1.49e-07	Serpina3m	serine (or cysteine) peptidase inhibitor, clade A, member 3M [Source:MGI Symbol;Acc:MGI:98378]
ENSMUSG00000079015	533.083	1119.76	-1.0708	1.73e-42	4.62e-40	Serpina1c	serine (or cysteine) peptidase inhibitor, clade A, member 1C [Source:MGI Symbol;Acc:MGI:891969]
ENSMUSG00000085995	56.1965	11.9741	2.2306	9.46e-09	6.04e-07	Gm2788	predicted gene 2788 [Source:MGI Symbol;Acc:MGI:3780956]
ENSMUSG00000090555	302.531	640.843	-1.0829	1.69e-25	2.71e-23	Gm8893	predicted gene 8893 [Source:MGI Symbol;Acc:MGI:3779818]
ENSMUSG00000090877	95.954	23.443	2.0332	1.29e-12	1.07e-10	Hspa1b	heat shock protein 1B [Source:MGI Symbol;Acc:MGI:99517]
ENSMUSG00000092008	6.27216	216.797	-5.1112	6.21e-51	2.11e-48	Cyp2c69	cytochrome P450, family 2, subfamily c, polypeptide 69 [Source:MGI Symbol;Acc:MGI:3721049]
ENSMUSG00000092274	168.033	58.557	1.5208	8.5e-15	7.99e-13	Neat1	nuclear paraspeckle assembly transcript 1 (non-protein coding) [Source:MGI Symbol;Acc:MGI:1914211]
ENSMUSG00000094156	34.3451	9.5995	1.8391	6.76e-05	0.0023905	Sult2a7	sulfotransferase family 2A, dehydroepiandrosterone (DHEA)-preferring, member 7 [Source:MGI Symbol;Acc:MGI:3645246]
ENSMUSG00000096688	249.217	106.1	1.232	4.29e-16	4.34e-14	Mup17	major urinary protein 17 [Source:MGI Symbol;Acc:MGI:3705217]
ENSMUSG00000097815	187.254	93.5699	1.0009	1.62e-09	1.13e-07	Gm26809	predicted gene, 26809 [Source:MGI Symbol;Acc:MGI:5477303]
ENSMUSG00000100862	80.4759	0	7.6374	1.86e-19	2.36e-17	Gm10925	predicted gene 10925 [Source:MGI Symbol;Acc:MGI:3809095]
ENSMUSG00000102070	346.385	0	8.7431	7.19e-70	3.59e-67	Gm28661	predicted gene 28661 [Source:MGI Symbol;Acc:MGI:5579367]
