# Supplementary material for: Curcumin promotes AApoAII amyloidosis and peroxisome proliferation in mice by activating the PPARα signaling pathway
Source: eLife journal article supplement (doi:10.7554/elife.63538), 2021-01-26
Supplement: supp [file elife-63538-supp-v1.zip › elife_poa_e63538_Figure_3_source_data_2.xls]

Gene_id	readcount_A-Cur	readcount_A-NT	log2.Fold_change.	pvalue	qvalue	Gene name	Gene description
ENSMUSG00000020777	5303.897802	1616.948699	1.7138	0	0	Acox1	acyl-Coenzyme A oxidase 1, palmitoyl [Source:MGI Symbol;Acc:MGI:1330812]
ENSMUSG00000022853	4982.720278	459.7670877	3.438	0	0	Ehhadh	enoyl-Coenzyme A, hydratase/3-hydroxyacyl Coenzyme A dehydrogenase [Source:MGI Symbol;Acc:MGI:1277964]
ENSMUSG00000028715	5282.346439	483.8101069	3.4487	0	0	Cyp4a14	cytochrome P450, family 4, subfamily a, polypeptide 14 [Source:MGI Symbol;Acc:MGI:1096550]
ENSMUSG00000037071	16574.69477	2761.830524	2.5853	0	0	Scd1	stearoyl-Coenzyme A desaturase 1 [Source:MGI Symbol;Acc:MGI:98239]
ENSMUSG00000054422	9470.268304	4050.970465	1.2251	0	0	Fabp1	fatty acid binding protein 1, liver [Source:MGI Symbol;Acc:MGI:95479]
ENSMUSG00000066072	2688.20723	535.6250396	2.3273	0	0	Cyp4a10	cytochrome P450, family 4, subfamily a, polypeptide 10 [Source:MGI Symbol;Acc:MGI:88611]
ENSMUSG00000010651	3629.566222	1093.233858	1.7312	4.57E-303	8.72E-300	Acaa1b	acetyl-Coenzyme A acyltransferase 1B [Source:MGI Symbol;Acc:MGI:3605455]
ENSMUSG00000078686	1664.43266	4242.201516	-1.3498	1.05E-267	1.78E-264	Mup9	major urinary protein 9 [Source:MGI Symbol;Acc:MGI:3782918]
ENSMUSG00000056666	1074.117648	183.7176076	2.5476	5.74E-149	7.30E-146	Retsat	retinol saturase (all trans retinol 13,14 reductase) [Source:MGI Symbol;Acc:MGI:1914692]
ENSMUSG00000057465	605.2482401	34.45052987	4.1349	4.82E-129	5.66E-126	Saa2	serum amyloid A 2 [Source:MGI Symbol;Acc:MGI:98222]
ENSMUSG00000057400	1224.298403	2641.782393	-1.1096	1.17E-124	1.27E-121	Ces1c	carboxylesterase 1C [Source:MGI Symbol;Acc:MGI:95420]
ENSMUSG00000074115	686.4759478	87.37856527	2.9739	8.64E-113	8.25E-110	Saa1	serum amyloid A 1 [Source:MGI Symbol;Acc:MGI:98221]
ENSMUSG00000058207	718.7181438	1794.154655	-1.3198	1.56E-110	1.32E-107	Serpina3k	serine (or cysteine) peptidase inhibitor, clade A, member 3K [Source:MGI Symbol;Acc:MGI:98377]
ENSMUSG00000026385	1780.787392	815.2364485	1.1272	1.34E-77	1.02E-74	Dbi	diazepam binding inhibitor [Source:MGI Symbol;Acc:MGI:94865]
ENSMUSG00000031765	567.8020406	110.6980677	2.3588	6.51E-73	4.73E-70	Mt1	metallothionein 1 [Source:MGI Symbol;Acc:MGI:97171]
ENSMUSG00000038656	4.355524718	285.3995431	-6.034	9.44E-70	6.27E-67	Cyp3a16	cytochrome P450, family 3, subfamily a, polypeptide 16 [Source:MGI Symbol;Acc:MGI:106099]
ENSMUSG00000072949	400.9345351	47.36252169	3.0815	6.14E-69	3.91E-66	Acot1	acyl-CoA thioesterase 1 [Source:MGI Symbol;Acc:MGI:1349396]
ENSMUSG00000054827	158.7221086	607.1418908	-1.9355	9.25E-65	5.23E-62	Cyp2c50	cytochrome P450, family 2, subfamily c, polypeptide 50 [Source:MGI Symbol;Acc:MGI:2147497]
ENSMUSG00000079015	435.8352981	1069.190839	-1.2947	9.11E-65	5.23E-62	Serpina1c	serine (or cysteine) peptidase inhibitor, clade A, member 1C [Source:MGI Symbol;Acc:MGI:891969]
ENSMUSG00000092008	1.696957683	247.8323256	-7.1903	7.80E-58	4.11E-55	Cyp2c69	cytochrome P450, family 2, subfamily c, polypeptide 69 [Source:MGI Symbol;Acc:MGI:3721049]
ENSMUSG00000031762	315.0684764	32.94784117	3.2574	2.47E-57	1.26E-54	Mt2	metallothionein 2 [Source:MGI Symbol;Acc:MGI:97172]
ENSMUSG00000054417	3.90300267	220.6169635	-5.8208	1.86E-54	8.63E-52	Cyp3a44	cytochrome P450, family 3, subfamily a, polypeptide 44 [Source:MGI Symbol;Acc:MGI:2449818]
ENSMUSG00000002944	286.5030221	26.9927415	3.4079	2.61E-54	1.17E-51	Cd36	CD36 molecule [Source:MGI Symbol;Acc:MGI:107899]
ENSMUSG00000005547	170.6008123	556.2730955	-1.7052	1.66E-50	6.65E-48	Cyp2a5	cytochrome P450, family 2, subfamily a, polypeptide 5 [Source:MGI Symbol;Acc:MGI:88597]
ENSMUSG00000078673	418.3000687	948.8087776	-1.1816	2.00E-50	7.83E-48	Mup19	major urinary protein 19 [Source:MGI Symbol;Acc:MGI:3705235]
ENSMUSG00000025004	7.636309571	205.9240073	-4.7531	2.31E-49	8.82E-47	Cyp2c40	cytochrome P450, family 2, subfamily c, polypeptide 40 [Source:MGI Symbol;Acc:MGI:1306815]
ENSMUSG00000053898	963.6457026	420.7528366	1.1955	5.42E-47	2.02E-44	Ech1	enoyl coenzyme A hydratase 1, peroxisomal [Source:MGI Symbol;Acc:MGI:1858208]
ENSMUSG00000093930	726.4675839	270.2613458	1.4265	5.77E-47	2.10E-44	Hmgcs1	3-hydroxy-3-methylglutaryl-Coenzyme A synthase 1 [Source:MGI Symbol;Acc:MGI:107592]
ENSMUSG00000022347	107.8133781	422.6451113	-1.9709	1.16E-46	4.12E-44	A1bg	alpha-1-B glycoprotein [Source:MGI Symbol;Acc:MGI:2152878]
ENSMUSG00000062908	1137.810126	546.0325502	1.0592	2.09E-45	7.08E-43	Acadm	acyl-Coenzyme A dehydrogenase, medium chain [Source:MGI Symbol;Acc:MGI:87867]
ENSMUSG00000060613	457.9523133	949.4766392	-1.0519	2.13E-42	6.93E-40	Cyp2c70	cytochrome P450, family 2, subfamily c, polypeptide 70 [Source:MGI Symbol;Acc:MGI:2385878]
ENSMUSG00000075551	87.22362488	355.4137056	-2.0267	6.93E-41	2.16E-38	Cyp3a41a	cytochrome P450, family 3, subfamily a, polypeptide 41A [Source:MGI Symbol;Acc:MGI:1858451]
ENSMUSG00000027605	335.8844906	75.24574538	2.1583	1.89E-39	5.65E-37	Acss2	acyl-CoA synthetase short-chain family member 2 [Source:MGI Symbol;Acc:MGI:1890410]
ENSMUSG00000024981	796.8913277	354.745844	1.1676	9.91E-38	2.85E-35	Acsl5	acyl-CoA synthetase long-chain family member 5 [Source:MGI Symbol;Acc:MGI:1919129]
ENSMUSG00000067225	172.8068573	481.5282463	-1.4785	2.89E-36	8.19E-34	Cyp2c54	cytochrome P450, family 2, subfamily c, polypeptide 54 [Source:MGI Symbol;Acc:MGI:3642960]
ENSMUSG00000078964	189.6633036	505.5712656	-1.4145	9.96E-36	2.72E-33	Ces1b	carboxylesterase 1B [Source:MGI Symbol;Acc:MGI:3779470]
ENSMUSG00000029311	603.5512824	241.6546054	1.3205	5.14E-35	1.38E-32	Hsd17b11	hydroxysteroid (17-beta) dehydrogenase 11 [Source:MGI Symbol;Acc:MGI:2149821]
ENSMUSG00000028494	683.0254672	297.0871219	1.2011	4.75E-34	1.25E-31	Plin2	perilipin 2 [Source:MGI Symbol;Acc:MGI:87920]
ENSMUSG00000028223	637.5470013	274.8250671	1.214	1.98E-32	5.13E-30	Decr1	2,4-dienoyl CoA reductase 1, mitochondrial [Source:MGI Symbol;Acc:MGI:1914710]
ENSMUSG00000034450	193.6228716	489.2643104	-1.3374	5.18E-32	1.30E-29	Gulo	gulonolactone (L-) oxidase [Source:MGI Symbol;Acc:MGI:1353434]
ENSMUSG00000042248	42.59363783	219.3925505	-2.3648	7.34E-31	1.78E-28	Cyp2c37	cytochrome P450, family 2. subfamily c, polypeptide 37 [Source:MGI Symbol;Acc:MGI:1306806]
ENSMUSG00000028712	204.7096618	40.62825009	2.333	4.69E-27	1.01E-24	Cyp4a31	cytochrome P450, family 4, subfamily a, polypeptide 31 [Source:MGI Symbol;Acc:MGI:3028580]
ENSMUSG00000037095	484.8208099	202.1951131	1.2617	1.44E-26	3.06E-24	Lrg1	leucine-rich alpha-2-glycoprotein 1 [Source:MGI Symbol;Acc:MGI:1924155]
ENSMUSG00000058258	391.5447026	157.3927278	1.3148	3.82E-23	7.67E-21	Idi1	isopentenyl-diphosphate delta isomerase [Source:MGI Symbol;Acc:MGI:2442264]
ENSMUSG00000069456	257.767872	77.69457141	1.7302	4.04E-23	8.00E-21	Rdh16	retinol dehydrogenase 16 [Source:MGI Symbol;Acc:MGI:1201375]
ENSMUSG00000034785	60.69451978	208.8737296	-1.783	3.74E-21	6.80E-19	Dio1	deiodinase, iodothyronine, type I [Source:MGI Symbol;Acc:MGI:94896]
ENSMUSG00000031271	151.9908431	29.99811891	2.341	1.39E-20	2.41E-18	Serpina7	serine (or cysteine) peptidase inhibitor, clade A (alpha-1 antiproteinase, antitrypsin), member 7 [Source:MGI Symbol;Acc:MGI:3041197]
ENSMUSG00000042010	195.715786	51.53665697	1.9251	1.41E-20	2.41E-18	Acacb	acetyl-Coenzyme A carboxylase beta [Source:MGI Symbol;Acc:MGI:2140940]
ENSMUSG00000096688	104.5891585	273.7676195	-1.3882	1.36E-19	2.24E-17	Mup17	major urinary protein 17 [Source:MGI Symbol;Acc:MGI:3705217]
ENSMUSG00000032310	189.8329994	396.3202314	-1.0619	6.66E-19	1.05E-16	Cyp1a2	cytochrome P450, family 1, subfamily a, polypeptide 2 [Source:MGI Symbol;Acc:MGI:88589]
ENSMUSG00000037440	113.0739469	16.86350655	2.7453	1.51E-18	2.33E-16	Vnn1	vanin 1 [Source:MGI Symbol;Acc:MGI:108395]
ENSMUSG00000024292	179.7078186	377.3418296	-1.0702	2.82E-18	4.27E-16	Cyp4f14	cytochrome P450, family 4, subfamily f, polypeptide 14 [Source:MGI Symbol;Acc:MGI:1927669]
ENSMUSG00000078798	19.62814386	114.5382722	-2.5448	3.41E-18	5.11E-16	Sult2a1	sulfotransferase family 2A, dehydroepiandrosterone (DHEA)-preferring, member 1 [Source:MGI Symbol;Acc:MGI:98430]
ENSMUSG00000032418	287.3515009	112.9242732	1.3475	4.92E-18	7.30E-16	Me1	malic enzyme 1, NADP(+)-dependent, cytosolic [Source:MGI Symbol;Acc:MGI:97043]
ENSMUSG00000078674	27.09475766	129.5095041	-2.257	5.88E-18	8.64E-16	Mup18	major urinary protein 18 [Source:MGI Symbol;Acc:MGI:3705220]
ENSMUSG00000053168	6.109047657	78.13981251	-3.677	1.94E-17	2.74E-15	9030619P08Rik	RIKEN cDNA 9030619P08 gene [Source:MGI Symbol;Acc:MGI:3612405]
ENSMUSG00000015568	120.1446039	22.42902026	2.4213	3.22E-17	4.51E-15	Lpl	lipoprotein lipase [Source:MGI Symbol;Acc:MGI:96820]
ENSMUSG00000024132	359.0762456	163.6261031	1.1339	4.09E-17	5.67E-15	Eci1	enoyl-Coenzyme A delta isomerase 1 [Source:MGI Symbol;Acc:MGI:94871]
ENSMUSG00000021539	94.91649971	242.8233632	-1.3552	5.41E-17	7.37E-15	Lect2	leukocyte cell-derived chemotaxin 2 [Source:MGI Symbol;Acc:MGI:1278342]
ENSMUSG00000035836	147.4656226	317.2342816	-1.1052	2.46E-16	3.29E-14	Ugt2b1	UDP glucuronosyltransferase 2 family, polypeptide B1 [Source:MGI Symbol;Acc:MGI:1919023]
ENSMUSG00000069668	8.654484181	76.97105463	-3.1528	2.19E-15	2.83E-13	Sult3a1	sulfotransferase family 3A, member 1 [Source:MGI Symbol;Acc:MGI:1931469]
ENSMUSG00000054263	119.9749082	270.3726561	-1.1722	2.35E-15	3.02E-13	Lifr	leukemia inhibitory factor receptor [Source:MGI Symbol;Acc:MGI:96788]
ENSMUSG00000066071	66.57730641	0	8.2243	3.31E-15	4.17E-13	Cyp4a12a	cytochrome P450, family 4, subfamily a, polypeptide 12a [Source:MGI Symbol;Acc:MGI:88612]
ENSMUSG00000021340	126.8193041	278.6096164	-1.1355	4.31E-15	5.31E-13	Gpld1	glycosylphosphatidylinositol specific phospholipase D1 [Source:MGI Symbol;Acc:MGI:106604]
ENSMUSG00000021792	221.1701513	84.15056732	1.3941	6.23E-15	7.56E-13	Fam213a	family with sequence similarity 213, member A [Source:MGI Symbol;Acc:MGI:1917814]
ENSMUSG00000001467	273.0404911	117.9888907	1.2105	9.95E-15	1.19E-12	Cyp51	cytochrome P450, family 51 [Source:MGI Symbol;Acc:MGI:106040]
ENSMUSG00000040127	27.99980176	115.7070301	-2.047	1.50E-14	1.77E-12	Sdr9c7	4short chain dehydrogenase/reductase family 9C, member 7 [Source:MGI Symbol;Acc:MGI:1917311]
ENSMUSG00000020917	335.8279254	162.0121041	1.0516	2.27E-14	2.67E-12	Acly	ATP citrate lyase [Source:MGI Symbol;Acc:MGI:103251]
ENSMUSG00000062181	84.73475361	210.8216594	-1.315	2.30E-14	2.68E-12	Ces3b	carboxylesterase 3B [Source:MGI Symbol;Acc:MGI:3644960]
ENSMUSG00000026691	0	64.61561419	-9.1578	1.30E-13	1.37E-11	Fmo3	flavin containing monooxygenase 3 [Source:MGI Symbol;Acc:MGI:1100496]
ENSMUSG00000027533	141.9787928	42.96576585	1.7244	2.27E-13	2.38E-11	Fabp5	fatty acid binding protein 5, epidermal [Source:MGI Symbol;Acc:MGI:101790]
ENSMUSG00000017754	61.26017234	5.231582889	3.5496	2.98E-13	3.10E-11	Pltp	phospholipid transfer protein [Source:MGI Symbol;Acc:MGI:103151]
ENSMUSG00000070811	31.45028238	114.5939273	-1.8654	5.78E-13	5.77E-11	Sult2a2	sulfotransferase family 2A, dehydroepiandrosterone (DHEA)-preferring, member 2 [Source:MGI Symbol;Acc:MGI:107550]
ENSMUSG00000100094	136.3788324	41.29611174	1.7235	6.81E-13	6.76E-11	1810008I18Rik	RIKEN cDNA 1810008I18 gene [Source:MGI Symbol;Acc:MGI:1920875]
ENSMUSG00000073842	53.17134072	150.5471459	-1.5015	1.17E-12	1.13E-10	Mup7	major urinary protein 7 [Source:MGI Symbol;Acc:MGI:3709615]
ENSMUSG00000076435	279.6586261	132.9044674	1.0733	1.36E-12	1.32E-10	Acsf2	acyl-CoA synthetase family member 2 [Source:MGI Symbol;Acc:MGI:2388287]
ENSMUSG00000028240	27.71697548	100.9584187	-1.8649	1.36E-11	1.24E-09	Cyp7a1	cytochrome P450, family 7, subfamily a, polypeptide 1 [Source:MGI Symbol;Acc:MGI:106091]
ENSMUSG00000021417	262.5193535	127.8955051	1.0375	2.52E-11	2.25E-09	Eci2	enoyl-Coenzyme A delta isomerase 2 [Source:MGI Symbol;Acc:MGI:1346064]
ENSMUSG00000021226	66.35104539	10.68578633	2.6344	4.63E-11	4.11E-09	Acot2	acyl-CoA thioesterase 2 [Source:MGI Symbol;Acc:MGI:2159605]
ENSMUSG00000028445	40.78354964	120.4377167	-1.5622	6.09E-11	5.35E-09	Enho	energy homeostasis associated [Source:MGI Symbol;Acc:MGI:1916888]
ENSMUSG00000004552	78.96509749	16.91916168	2.2226	8.49E-11	7.32E-09	Ctse	cathepsin E [Source:MGI Symbol;Acc:MGI:107361]
ENSMUSG00000032080	9.559528278	59.77361726	-2.6445	1.42E-10	1.21E-08	Apoa4	apolipoprotein A-IV [Source:MGI Symbol;Acc:MGI:88051]
ENSMUSG00000067144	30.71493405	101.069729	-1.7183	1.52E-10	1.29E-08	Slc22a7	solute carrier family 22 (organic anion transporter), member 7 [Source:MGI Symbol;Acc:MGI:1859559]
ENSMUSG00000058454	195.3763945	86.87766904	1.1692	1.98E-10	1.66E-08	Dhcr7	7-dehydrocholesterol reductase [Source:MGI Symbol;Acc:MGI:1298378]
ENSMUSG00000006777	47.23198883	4.396755832	3.4253	2.72E-10	2.25E-08	Krt23	keratin 23 [Source:MGI Symbol;Acc:MGI:2148866]
ENSMUSG00000026822	64.71065296	11.57626852	2.4828	3.28E-10	2.68E-08	Lcn2	lipocalin 2 [Source:MGI Symbol;Acc:MGI:96757]
ENSMUSG00000060002	182.8754729	83.48270567	1.1313	2.09E-09	1.62E-07	Chpt1	choline phosphotransferase 1 [Source:MGI Symbol;Acc:MGI:2384841]
ENSMUSG00000048489	111.0375977	40.01604359	1.4724	8.18E-09	6.18E-07	8430408G22Rik	RIKEN cDNA 8430408G22 gene [Source:MGI Symbol;Acc:MGI:1918730]
ENSMUSG00000026853	114.7143393	42.68749017	1.4262	1.08E-08	8.12E-07	Crat	carnitine acetyltransferase [Source:MGI Symbol;Acc:MGI:109501]
ENSMUSG00000039878	30.54523829	0	5.0128	1.51E-08	1.12E-06	Slc39a5	solute carrier family 39 (metal ion transporter), member 5 [Source:MGI Symbol;Acc:MGI:1919336]
ENSMUSG00000046794	85.5266672	172.0300288	-1.0082	1.96E-08	1.45E-06	Ppp1r3b	protein phosphatase 1, regulatory (inhibitor) subunit 3B [Source:MGI Symbol;Acc:MGI:2177268]
ENSMUSG00000023232	49.38146856	8.348270567	2.5644	2.23E-08	1.63E-06	Serinc2	serine incorporator 2 [Source:MGI Symbol;Acc:MGI:1919132]
ENSMUSG00000023031	25.90688729	80.9782245	-1.6442	2.70E-08	1.96E-06	Cela1	chymotrypsin-like elastase family, member 1 [Source:MGI Symbol;Acc:MGI:95314]
ENSMUSG00000059810	4.864612023	38.84728571	-2.9974	3.69E-08	2.64E-06	Rgs3	regulator of G-protein signaling 3 [Source:MGI Symbol;Acc:MGI:1354734]
ENSMUSG00000031349	118.1082547	47.19555627	1.3234	4.50E-08	3.15E-06	Nsdhl	NAD(P) dependent steroid dehydrogenase-like [Source:MGI Symbol;Acc:MGI:1099438]
ENSMUSG00000024694	143.2232284	64.17037309	1.1583	6.45E-08	4.43E-06	Keg1	kidney expressed gene 1 [Source:MGI Symbol;Acc:MGI:1928492]
ENSMUSG00000078799	16.57362003	62.38940871	-1.9124	6.51E-08	4.46E-06	Sult2a5	sulfotransferase family 2A, dehydroepiandrosterone (DHEA)-preferring, member 5 [Source:MGI Symbol;Acc:MGI:3648378]
ENSMUSG00000030545	118.9001683	48.36431415	1.2977	6.55E-08	4.46E-06	Pex11a	peroxisomal biogenesis factor 11 alpha [Source:MGI Symbol;Acc:MGI:1338788]
ENSMUSG00000020553	114.8274698	46.52769463	1.3033	9.93E-08	6.71E-06	Pctp	phosphatidylcholine transfer protein [Source:MGI Symbol;Acc:MGI:107375]
ENSMUSG00000053219	36.08863338	4.229790421	3.0929	1.34E-07	8.96E-06	Raet1e	retinoic acid early transcript 1E [Source:MGI Symbol;Acc:MGI:2675273]
ENSMUSG00000023832	158.9483696	76.74843408	1.0503	1.55E-07	1.02E-05	Acat2	acetyl-Coenzyme A acetyltransferase 2 [Source:MGI Symbol;Acc:MGI:87871]
ENSMUSG00000030498	105.0982458	42.40921448	1.3093	3.12E-07	1.99E-05	Gas2	growth arrest specific 2 [Source:MGI Symbol;Acc:MGI:95657]
ENSMUSG00000020926	72.17726676	22.76295108	1.6649	3.47E-07	2.20E-05	Adam11	a disintegrin and metallopeptidase domain 11 [Source:MGI Symbol;Acc:MGI:1098667]
ENSMUSG00000017868	106.0598552	44.24583401	1.2613	6.12E-07	3.77E-05	Sgk2	serum/glucocorticoid regulated kinase 2 [Source:MGI Symbol;Acc:MGI:1351318]
ENSMUSG00000040170	14.87666235	54.48637924	-1.8728	6.31E-07	3.87E-05	Fmo2	flavin containing monooxygenase 2 [Source:MGI Symbol;Acc:MGI:1916776]
ENSMUSG00000033105	110.7547714	47.36252169	1.2256	6.38E-07	3.90E-05	Lss	lanosterol synthase [Source:MGI Symbol;Acc:MGI:1336155]
ENSMUSG00000047822	37.38963427	90.99614918	-1.2832	8.52E-07	5.19E-05	Angptl8	angiopoietin-like 8 [Source:MGI Symbol;Acc:MGI:3643534]
ENSMUSG00000075552	4.808046767	32.72522062	-2.7669	1.18E-06	7.11E-05	Cyp3a41b	cytochrome P450, family 3, subfamily a, polypeptide 41B [Source:MGI Symbol;Acc:MGI:3714859]
ENSMUSG00000106069	0	22.59598567	-4.5545	1.21E-06	7.24E-05	Gm6135	prediticted gene 6135 [Source:MGI Symbol;Acc:MGI:3643755]
ENSMUSG00000027952	100.1205033	41.90831825	1.2564	1.36E-06	8.02E-05	Pmvk	phosphomevalonate kinase [Source:MGI Symbol;Acc:MGI:1915853]
ENSMUSG00000033318	124.8395202	59.3840313	1.0719	2.24E-06	0.0001277	Gstt2	glutathione S-transferase, theta 2 [Source:MGI Symbol;Acc:MGI:106188]
ENSMUSG00000027870	109.4537705	49.42176176	1.1471	2.76E-06	0.0001555	Hao2	hydroxyacid oxidase 2 [Source:MGI Symbol;Acc:MGI:96012]
ENSMUSG00000055254	1.923218707	23.93170896	-3.6373	2.81E-06	0.00015767	Ntrk2	neurotrophic tyrosine kinase, receptor, type 2 [Source:MGI Symbol;Acc:MGI:97384]
ENSMUSG00000027577	20.19379642	0	4.9182	4.44E-06	0.00024298	Chrna4	cholinergic receptor, nicotinic, alpha polypeptide 4 [Source:MGI Symbol;Acc:MGI:87888]
ENSMUSG00000068246	15.10292337	50.64617478	-1.7456	4.61E-06	0.0002504	Apol9b	apolipoprotein L 9b [Source:MGI Symbol;Acc:MGI:1919148]
ENSMUSG00000023087	25.90688729	68.56712893	-1.4042	4.88E-06	0.00026349	Noct	nocturnin [Source:MGI Symbol;Acc:MGI:109382]
ENSMUSG00000078688	37.55933004	84.98539438	-1.178	8.28E-06	0.00043616	Mup2	major urinary protein 2 [Source:MGI Symbol;Acc:MGI:97234]
ENSMUSG00000018459	7.636309571	35.28535693	-2.2081	8.65E-06	0.00045412	Slc13a3	solute carrier family 13 (sodium-dependent dicarboxylate transporter), member 3 [Source:MGI Symbol;Acc:MGI:2149635]
ENSMUSG00000026981	24.88871268	2.727101719	3.1901	8.87E-06	0.00046376	Il1rn	interleukin 1 receptor antagonist [Source:MGI Symbol;Acc:MGI:96547]
ENSMUSG00000003526	52.5491229	106.0786913	-1.0134	9.55E-06	0.00049764	Prodh	proline dehydrogenase [Source:MGI Symbol;Acc:MGI:97770]
ENSMUSG00000057897	0	18.31054011	-4.7536	1.06E-05	0.00054987	Camk2b	calcium/calmodulin-dependent protein kinase II, beta [Source:MGI Symbol;Acc:MGI:88257]
ENSMUSG00000020027	12.89687839	44.74673024	-1.7948	1.14E-05	0.00058936	Socs2	suppressor of cytokine signaling 2 [Source:MGI Symbol;Acc:MGI:1201787]
ENSMUSG00000060227	21.94731936	1.892274662	3.5359	1.30E-05	0.0006602	Casc4	cancer susceptibility candidate 4 [Source:MGI Symbol;Acc:MGI:2443129]
ENSMUSG00000023963	13.40596569	44.91369565	-1.7443	1.61E-05	0.00081069	Cyp39a1	cytochrome P450, family 39, subfamily a, polypeptide 1 [Source:MGI Symbol;Acc:MGI:1927096]
ENSMUSG00000029802	69.17930819	26.71446582	1.3727	1.64E-05	0.00081808	Abcg2	ATP binding cassette subfamily G member 2 (Junior blood group) [Source:MGI Symbol;Acc:MGI:1347061]
ENSMUSG00000066441	89.93875717	40.85087064	1.1386	2.41E-05	0.0011711	Rdh11	retinol dehydrogenase 11 [Source:MGI Symbol;Acc:MGI:102581]
ENSMUSG00000057346	1.187870378	18.31054011	-3.9462	2.54E-05	0.0012294	Apol9a	apolipoprotein L 9a [Source:MGI Symbol;Acc:MGI:3606001]
ENSMUSG00000063929	47.45824985	14.63730106	1.697	2.79E-05	0.0013394	Cyp4a32	cytochrome P450, family 4, subfamily a, polypeptide 32 [Source:MGI Symbol;Acc:MGI:3717148]
ENSMUSG00000042589	1.810088195	19.42364285	-3.4237	3.72E-05	0.0017417	Cux2	cut-like homeobox 2 [Source:MGI Symbol;Acc:MGI:107321]
ENSMUSG00000038068	34.61793672	75.96926216	-1.1339	4.28E-05	0.0019787	Rnf144b	ring finger protein 144B [Source:MGI Symbol;Acc:MGI:2384986]
ENSMUSG00000022215	19.11905656	1.725309251	3.4701	5.38E-05	0.0024652	Fitm1	fat storage-inducing transmembrane protein 1 [Source:MGI Symbol;Acc:MGI:1915930]
ENSMUSG00000029597	75.85400841	33.44873741	1.1813	6.38E-05	0.0028983	Sds	serine dehydratase [Source:MGI Symbol;Acc:MGI:98270]
ENSMUSG00000005089	34.84419775	73.85436695	-1.0838	9.83E-05	0.0043743	Slc1a2	solute carrier family 1 (glial high affinity glutamate transporter), member 2 [Source:MGI Symbol;Acc:MGI:101931]
