# Supplementary material for: Curcumin promotes AApoAII amyloidosis and peroxisome proliferation in mice by activating the PPARα signaling pathway
Source: eLife journal article supplement (doi:10.7554/elife.63538), 2021-01-26
Supplement: supp [file elife-63538-supp-v1.zip › elife_poa_e63538_Figure_3_source_data_3.xlsx]

## Sheet: Sheet1
Gene name	Gene_id			readcount_Con	readcount_Cur	readcount_A-NT	readcount_A-Cur	Gene description
Cd36	ENSMUSG00000002944			82.0505	283.512	26.9927	286.503	CD36 molecule [Source:MGI Symbol;Acc:MGI:107899]								up
9030619P08Rik	ENSMUSG00000053168	6.10905	78.1398	79.1201	13.8595	78.1398	6.10905	RIKEN cDNA 9030619P08 gene [Source:MGI Symbol;Acc:MGI:3612405]								down
A1bg	ENSMUSG00000022347			393.276	53.3134	422.645	107.813	alpha-1-B glycoprotein [Source:MGI Symbol;Acc:MGI:2152878]								down
Acaa1b	ENSMUSG00000010651			1191.55	4948.58	1093.23	3629.57	acetyl-Coenzyme A acyltransferase 1B [Source:MGI Symbol;Acc:MGI:3605455]								up
Acot1	ENSMUSG00000072949			121.712	610.777	47.3625	400.935	acyl-CoA thioesterase 1 [Source:MGI Symbol;Acc:MGI:1349396]								up
Acot2	ENSMUSG00000021226	66.351	10.6858	16.3192	123.521	10.6858	66.351	acyl-CoA thioesterase 2 [Source:MGI Symbol;Acc:MGI:2159605]								up
Acox1	ENSMUSG00000020777			1803.49	4869.88	1616.95	5303.9	acyl-Coenzyme A oxidase 1, palmitoyl [Source:MGI Symbol;Acc:MGI:1330812]								up
Acsf2	ENSMUSG00000076435	279.659	132.904	126.764	296.663	132.904	279.659	acyl-CoA synthetase family member 2 [Source:MGI Symbol;Acc:MGI:2388287]								up
Adam11	ENSMUSG00000020926	72.1773	22.763	31.4257	132.98	22.763	72.1773	a disintegrin and metallopeptidase domain 11 [Source:MGI Symbol;Acc:MGI:1098667]								up
Angptl8	ENSMUSG00000047822	37.3896	90.9961	181.38	57.714	90.9961	37.3896	angiopoietin-like 8 [Source:MGI Symbol;Acc:MGI:3643534]								down
Apoa4	ENSMUSG00000032080	9.55953	59.7736	66.5397	17.5519	59.7736	9.55953	apolipoprotein A-IV [Source:MGI Symbol;Acc:MGI:88051]								down
Apol9b	ENSMUSG00000068246	15.1029	50.6462	58.9612	12.2914	50.6462	15.1029	apolipoprotein L 9b [Source:MGI Symbol;Acc:MGI:1919148]								down
Ces1b	ENSMUSG00000078964			720.569	248.56	505.571	189.663	carboxylesterase 1B [Source:MGI Symbol;Acc:MGI:3779470]								down
Crat	ENSMUSG00000026853	114.714	42.6875	61.3358	154.73	42.6875	114.714	carnitine acetyltransferase [Source:MGI Symbol;Acc:MGI:109501]								up
Ctse	ENSMUSG00000004552	78.9651	16.9192	14.0961	97.6232	16.9192	78.9651	cathepsin E [Source:MGI Symbol;Acc:MGI:107361]								up
Cyp1a2	ENSMUSG00000032310	189.833	396.32	570.059	278.909	396.32	189.833	cytochrome P450, family 1, subfamily a, polypeptide 2 [Source:MGI Symbol;Acc:MGI:88589]								down
Cyp2a5	ENSMUSG00000005547			1770.1	354.023	556.273	170.601	cytochrome P450, family 2, subfamily a, polypeptide 5 [Source:MGI Symbol;Acc:MGI:88597]								down
Cyp2c37	ENSMUSG00000042248	42.5936	219.393	213.109	91.4016	219.393	42.5936	cytochrome P450, family 2. subfamily c, polypeptide 37 [Source:MGI Symbol;Acc:MGI:1306806]								down
Cyp2c40	ENSMUSG00000025004	7.63631	205.924	149.853	16.4897	205.924	7.63631	cytochrome P450, family 2, subfamily c, polypeptide 40 [Source:MGI Symbol;Acc:MGI:1306815]								down
Cyp2c69	ENSMUSG00000092008			216.797	6.27216	247.832	1.69696	cytochrome P450, family 2, subfamily c, polypeptide 69 [Source:MGI Symbol;Acc:MGI:3721049]								down
Cyp2c70	ENSMUSG00000060613			1040.99	490.746	949.477	457.952	cytochrome P450, family 2, subfamily c, polypeptide 70 [Source:MGI Symbol;Acc:MGI:2385878]								down
Cyp39a1	ENSMUSG00000023963	13.406	44.9137	93.5699	18.9682	44.9137	13.406	cytochrome P450, family 39, subfamily a, polypeptide 1 [Source:MGI Symbol;Acc:MGI:1927096]								down
Cyp3a16	ENSMUSG00000038656			263.582	14.517	285.4	4.35552	cytochrome P450, family 3, subfamily a, polypeptide 16 [Source:MGI Symbol;Acc:MGI:106099]								down
Cyp3a41a	ENSMUSG00000075551			390.043	53.7686	355.414	87.2236	cytochrome P450, family 3, subfamily a, polypeptide 41A [Source:MGI Symbol;Acc:MGI:1858451]								down
Cyp3a44	ENSMUSG00000054417	3.903	220.617	125.652	3.6419	220.617	3.903	cytochrome P450, family 3, subfamily a, polypeptide 44 [Source:MGI Symbol;Acc:MGI:2449818]								down
Cyp4a10	ENSMUSG00000066072			659.637	3692.58	535.625	2688.21	cytochrome P450, family 4, subfamily a, polypeptide 10 [Source:MGI Symbol;Acc:MGI:88611]								up
Cyp4a12a	ENSMUSG00000066071	66.5773	0	0	137.836	0	66.5773	cytochrome P450, family 4, subfamily a, polypeptide 12a [Source:MGI Symbol;Acc:MGI:88612]								up
Cyp4a14	ENSMUSG00000028715			842.988	6595.78	483.81	5282.35	cytochrome P450, family 4, subfamily a, polypeptide 14 [Source:MGI Symbol;Acc:MGI:1096550]								up
Cyp4a31	ENSMUSG00000028712			26.3734	209.258	40.6283	204.71	cytochrome P450, family 4, subfamily a, polypeptide 31 [Source:MGI Symbol;Acc:MGI:3028580]								up
Cyp4a32	ENSMUSG00000063929	47.4582	14.6373	13.0856	55.3872	14.6373	47.4582	cytochrome P450, family 4, subfamily a, polypeptide 32 [Source:MGI Symbol;Acc:MGI:3717148]								up
Cyp7a1	ENSMUSG00000028240			585.974	71.0171	100.958	27.717	cytochrome P450, family 7, subfamily a, polypeptide 1 [Source:MGI Symbol;Acc:MGI:106091]								down
Dio1	ENSMUSG00000034785	60.6945	208.874	207.551	97.1679	208.874	60.6945	deiodinase, iodothyronine, type I [Source:MGI Symbol;Acc:MGI:94896]								down
Eci1	ENSMUSG00000024132	359.076	163.626	203.408	406.881	163.626	359.076	enoyl-Coenzyme A delta isomerase 1 [Source:MGI Symbol;Acc:MGI:94871]								up
Ehhadh	ENSMUSG00000022853			461.079	5348.53	459.767	4982.72	enoyl-Coenzyme A, hydratase/3-hydroxyacyl Coenzyme A dehydrogenase [Source:MGI Symbol;Acc:MGI:1277964]								up
Fabp1	ENSMUSG00000054422			3140.5	9015.68	4050.97	9470.27	fatty acid binding protein 1, liver [Source:MGI Symbol;Acc:MGI:95479]								up
Fabp5	ENSMUSG00000027533	141.979	42.9658	12.1762	78.0985	42.9658	141.979	fatty acid binding protein 5, epidermal [Source:MGI Symbol;Acc:MGI:101790]								up
Fam213a	ENSMUSG00000021792	221.17	84.1506	79.6759	169.753	84.1506	221.17	family with sequence similarity 213, member A [Source:MGI Symbol;Acc:MGI:1917814]								up
Fitm1	ENSMUSG00000022215	19.1191	1.72531	2.27357	20.8903	1.72531	19.1191	fat storage-inducing transmembrane protein 1 [Source:MGI Symbol;Acc:MGI:1915930]								up
Fmo2	ENSMUSG00000040170	14.8767	54.4864	86.4966	30.7538	54.4864	14.8767	flavin containing monooxygenase 2 [Source:MGI Symbol;Acc:MGI:1916776]								down
Fmo3	ENSMUSG00000026691			208.612	0	64.6156	0	flavin containing monooxygenase 3 [Source:MGI Symbol;Acc:MGI:1100496]								down
Gulo	ENSMUSG00000034450			616.389	260.396	489.264	193.623	gulonolactone (L-) oxidase [Source:MGI Symbol;Acc:MGI:1353434]								down
Hao2	ENSMUSG00000027870	109.454	49.4218	40.2674	84.7248	49.4218	109.454	hydroxyacid oxidase 2 [Source:MGI Symbol;Acc:MGI:96012]								up
Hsd17b11	ENSMUSG00000029311			291.471	771.324	241.655	603.551	hydroxysteroid (17-beta) dehydrogenase 11 [Source:MGI Symbol;Acc:MGI:2149821]								up
Keg1	ENSMUSG00000024694	143.223	64.1704	43.9051	126	64.1704	143.223	kidney expressed gene 1 [Source:MGI Symbol;Acc:MGI:1928492]								up
Krt23	ENSMUSG00000006777	47.232	4.39676	10.3574	54.6791	4.39676	47.232	keratin 23 [Source:MGI Symbol;Acc:MGI:2148866]								up
Lect2	ENSMUSG00000021539	94.9165	242.823	286.975	117.502	242.823	94.9165	leukocyte cell-derived chemotaxin 2 [Source:MGI Symbol;Acc:MGI:1278342]								down
Lpl	ENSMUSG00000015568			5.9618	139.151	22.429	120.145	lipoprotein lipase [Source:MGI Symbol;Acc:MGI:96820]								up
Mt1	ENSMUSG00000031765			465.172	151.544	110.698	567.802	metallothionein 1 [Source:MGI Symbol;Acc:MGI:97171]
Mup17	ENSMUSG00000096688	104.589	273.768	106.1	249.217	273.768	104.589	major urinary protein 17 [Source:MGI Symbol;Acc:MGI:3705217]
Mup19	ENSMUSG00000078673			347.249	812.397	948.809	418.3	major urinary protein 19 [Source:MGI Symbol;Acc:MGI:3705235]								down
Mup7	ENSMUSG00000073842	53.1713	150.547	48.5027	141.579	150.547	53.1713	major urinary protein 7 [Source:MGI Symbol;Acc:MGI:3709615]
Noct	ENSMUSG00000023087	25.9069	68.5671	142.275	50.5819	68.5671	25.9069	nocturnin [Source:MGI Symbol;Acc:MGI:109382]								down
Ntrk2	ENSMUSG00000055254	1.92322	23.9317	23.8977	1.77037	23.9317	1.92322	neurotrophic tyrosine kinase, receptor, type 2 [Source:MGI Symbol;Acc:MGI:97384]								down
Pctp	ENSMUSG00000020553	114.827	46.5277	52.1405	148.863	46.5277	114.827	phosphatidylcholine transfer protein [Source:MGI Symbol;Acc:MGI:107375]								up
Pex11a	ENSMUSG00000030545	118.9	48.3643	79.1706	210.674	48.3643	118.9	peroxisomal biogenesis factor 11 alpha [Source:MGI Symbol;Acc:MGI:1338788]								up
Plin2	ENSMUSG00000028494			215.585	781.592	297.087	683.025	perilipin 2 [Source:MGI Symbol;Acc:MGI:87920]								up
Pltp	ENSMUSG00000017754	61.2602	5.23158	3.23352	21.8514	5.23158	61.2602	phospholipid transfer protein [Source:MGI Symbol;Acc:MGI:103151]								up
Ppp1r3b	ENSMUSG00000046794	85.5267	172.03	321.28	95.2964	172.03	85.5267	protein phosphatase 1, regulatory (inhibitor) subunit 3B [Source:MGI Symbol;Acc:MGI:2177268]								down
Prodh	ENSMUSG00000003526			349.018	91.7051	106.079	52.5491	proline dehydrogenase [Source:MGI Symbol;Acc:MGI:97770]								down
Retsat	ENSMUSG00000056666			245.444	1192.32	183.718	1074.12	retinol saturase (all trans retinol 13,14 reductase) [Source:MGI Symbol;Acc:MGI:1914692]								up
Saa1	ENSMUSG00000074115	686.476	87.3786	110.697	18.9176	87.3786	686.476	serum amyloid A 1 [Source:MGI Symbol;Acc:MGI:98221]
Saa2	ENSMUSG00000057465	605.248	34.4505	68.1059	7.23322	34.4505	605.248	serum amyloid A 2 [Source:MGI Symbol;Acc:MGI:98222]
Scd1	ENSMUSG00000037071			2683.52	7050.06	2761.83	16574.7	stearoyl-Coenzyme A desaturase 1 [Source:MGI Symbol;Acc:MGI:98239]								up
Serinc2	ENSMUSG00000023232	49.3815	8.34827	6.46703	50.4302	8.34827	49.3815	serine incorporator 2 [Source:MGI Symbol;Acc:MGI:1919132]								up
Serpina1c	ENSMUSG00000079015			1119.76	533.083	1069.19	435.835	serine (or cysteine) peptidase inhibitor, clade A, member 1C [Source:MGI Symbol;Acc:MGI:891969]								down
Serpina7	ENSMUSG00000031271	151.991	29.9981	10.0542	80.6276	29.9981	151.991	serine (or cysteine) peptidase inhibitor, clade A (alpha-1 antiproteinase, antitrypsin), member 7 [Source:MGI Symbol;Acc:MGI:3041197]								up
Sgk2	ENSMUSG00000017868	106.06	44.2458	47.5933	96.0551	44.2458	106.06	serum/glucocorticoid regulated kinase 2 [Source:MGI Symbol;Acc:MGI:1351318]								up
Slc1a2	ENSMUSG00000005089	34.8442	73.8544	134.646	63.1263	73.8544	34.8442	solute carrier family 1 (glial high affinity glutamate transporter), member 2 [Source:MGI Symbol;Acc:MGI:101931]								down
Slc22a7	ENSMUSG00000067144	30.7149	101.07	71.1879	21.5985	101.07	30.7149	solute carrier family 22 (organic anion transporter), member 7 [Source:MGI Symbol;Acc:MGI:1859559]								down
Slc39a5	ENSMUSG00000039878	30.5452	0	3.33456	29.4893	0	30.5452	solute carrier family 39 (metal ion transporter), member 5 [Source:MGI Symbol;Acc:MGI:1919336]								up
Sult2a1	ENSMUSG00000078798			660.951	94.3859	114.538	19.6281	sulfotransferase family 2A, dehydroepiandrosterone (DHEA)-preferring, member 1 [Source:MGI Symbol;Acc:MGI:98430]								down
Sult2a2	ENSMUSG00000070811	31.4503	114.594	182.845	59.3326	114.594	31.4503	sulfotransferase family 2A, dehydroepiandrosterone (DHEA)-preferring, member 2 [Source:MGI Symbol;Acc:MGI:107550]								down
Sult2a5	ENSMUSG00000078799	16.5736	62.3894	159.15	32.1701	62.3894	16.5736	sulfotransferase family 2A, dehydroepiandrosterone (DHEA)-preferring, member 5 [Source:MGI Symbol;Acc:MGI:3648378]								down
Sult3a1	ENSMUSG00000069668	8.65448	76.9711	57.0918	9.20591	76.9711	8.65448	sulfotransferase family 3A, member 1 [Source:MGI Symbol;Acc:MGI:1931469]								down
Vnn1	ENSMUSG00000037440			6.97227	164.897	16.8635	113.074	vanin 1 [Source:MGI Symbol;Acc:MGI:108395]								up
