# Supplementary material for: Curcumin promotes AApoAII amyloidosis and peroxisome proliferation in mice by activating the PPARα signaling pathway
Source: eLife journal article supplement (doi:10.7554/elife.63538), 2021-01-26
Supplement: supp [file elife-63538-supp-v1.zip › elife_poa_e63538_Figure_3_source_data_4.xls]

## Sheet: Supplementary File 3. CurvsCon_
##Databases: KEGG PATHWAY
##Statistical test method: hypergeometric test / Fisher's exact test
##FDR correction method: Benjamini and Hochberg
#Term	Database	ID	Input number	Background number	P-Value	Corrected P-Value	Input	KEGG_ID/KO	Entrez_ID	Hyperlink
PPAR signaling pathway	KEGG PATHWAY	mmu03320	17	82	7.52e-13	1.22e-10	ENSMUSG00000066072|ENSMUSG00000031808|ENSMUSG00000010651|ENSMUSG00000028715|ENSMUSG00000028712|ENSMUSG00000017754|ENSMUSG00000028240|ENSMUSG00000054422|ENSMUSG00000037071|ENSMUSG00000022853|ENSMUSG00000002944|ENSMUSG00000063929|ENSMUSG00000066071|ENSMUSG00000027533|ENSMUSG00000015568|ENSMUSG00000018796|ENSMUSG00000020777	mmu:13117|mmu:26457|mmu:235674|mmu:13119|mmu:13117|mmu:18830|mmu:13122|mmu:14080|mmu:20249|mmu:74147|mmu:12491|mmu:100040843|mmu:277753|mmu:16592|mmu:16956|mmu:14081|mmu:11430|	13117|26457|235674|13119|13117|18830|13122|14080|20249|74147|12491|100040843|277753|16592|16956|14081|11430|	http://www.genome.jp/kegg-bin/show_pathway?mmu03320/mmu:11430%09red/mmu:13117%09red/mmu:74147%09red/mmu:13119%09red/mmu:14081%09red/mmu:14080%09red/mmu:100040843%09red/mmu:16592%09red/mmu:18830%09red/mmu:16956%09red/mmu:26457%09red/mmu:277753%09red/mmu:235674%09red/mmu:20249%09red/mmu:13122%09red/mmu:12491%09red
Retinol metabolism	KEGG PATHWAY	mmu00830	17	88	2.04e-12	1.65e-10	ENSMUSG00000066072|ENSMUSG00000032310|ENSMUSG00000074254|ENSMUSG00000028712|ENSMUSG00000054417|ENSMUSG00000061906|ENSMUSG00000028715|ENSMUSG00000024987|ENSMUSG00000038656|ENSMUSG00000005547|ENSMUSG00000075551|ENSMUSG00000042248|ENSMUSG00000063929|ENSMUSG00000066071|ENSMUSG00000060613|ENSMUSG00000025004|ENSMUSG00000056666	mmu:13117|mmu:13077|mmu:13086|mmu:13117|mmu:337924|mmu:100559|mmu:13119|mmu:13082|mmu:13114|mmu:13087|mmu:53973|mmu:13096|mmu:100040843|mmu:277753|mmu:226105|mmu:13099|mmu:67442|	13117|13077|13086|13117|337924|100559|13119|13082|13114|13087|53973|13096|100040843|277753|226105|13099|67442|	http://www.genome.jp/kegg-bin/show_pathway?mmu00830/mmu:13099%09red/mmu:13119%09red/mmu:13117%09red/mmu:13114%09red/mmu:226105%09red/mmu:277753%09red/mmu:100559%09red/mmu:100040843%09red/mmu:337924%09red/mmu:13082%09red/mmu:53973%09red/mmu:13086%09red/mmu:13087%09red/mmu:13096%09red/mmu:13077%09red/mmu:67442%09red
Fatty acid degradation	KEGG PATHWAY	mmu00071	10	49	4.79e-08	2.04e-06	ENSMUSG00000066072|ENSMUSG00000066071|ENSMUSG00000010651|ENSMUSG00000028712|ENSMUSG00000028715|ENSMUSG00000024132|ENSMUSG00000022853|ENSMUSG00000020777|ENSMUSG00000063929|ENSMUSG00000018796	mmu:13117|mmu:277753|mmu:235674|mmu:13117|mmu:13119|mmu:13177|mmu:74147|mmu:11430|mmu:100040843|mmu:14081|	13117|277753|235674|13117|13119|13177|74147|11430|100040843|14081|	http://www.genome.jp/kegg-bin/show_pathway?mmu00071/mmu:11430%09red/mmu:13117%09red/mmu:74147%09red/mmu:13119%09red/mmu:14081%09red/mmu:100040843%09red/mmu:13177%09red/mmu:277753%09red/mmu:235674%09red
Metabolic pathways	KEGG PATHWAY	mmu01100	50	1256	5.03e-08	2.04e-06	ENSMUSG00000021670|ENSMUSG00000032607|ENSMUSG00000056091|ENSMUSG00000003555|ENSMUSG00000074254|ENSMUSG00000028240|ENSMUSG00000028715|ENSMUSG00000034450|ENSMUSG00000063929|ENSMUSG00000041798|ENSMUSG00000022615|ENSMUSG00000024843|ENSMUSG00000048087|ENSMUSG00000028712|ENSMUSG00000023262|ENSMUSG00000038656|ENSMUSG00000018796|ENSMUSG00000030934|ENSMUSG00000022853|ENSMUSG00000072949|ENSMUSG00000020777|…	mmu:15357|mmu:434437|mmu:20454|mmu:13074|mmu:13086|mmu:13122|mmu:13119|mmu:268756|mmu:100040843|mmu:103988|mmu:72962|mmu:12660|mmu:269378|mmu:13117|mmu:109652|mmu:13114|mmu:14081|mmu:18242|mmu:74147|mmu:26897|mmu:11430|mmu:226105|mmu:12116|mmu:53973|mmu:19125|mmu:13077|mmu:22436|mmu:13117|mmu:277753|mmu:216456|mmu:100559|mmu:13087|mmu:59027|mmu:13096|mmu:266645|mmu:108682|mmu:13099|mmu:235674|mmu…	15357|434437|20454|13074|13086|13122|13119|268756|100040843|103988|72962|12660|269378|13117|109652|13114|14081|18242|74147|26897|11430|226105|12116|53973|19125|13077|22436|13117|277753|216456|100559|13087|59027|13096|266645|108682|13099|235674|246277|171210|56185|269378|20322|18113|76238|17705|17709|337924|13082|109900|	http://www.genome.jp/kegg-bin/show_pathway?mmu01100/mmu:17709%09red/mmu:13117%09red/mmu:13114%09red/mmu:171210%09red/mmu:14081%09red/mmu:268756%09red/mmu:269378%09red/mmu:17705%09red/mmu:108682%09red/mmu:13099%09red/mmu:235674%09red/mmu:13096%09red/mmu:277753%09red/mmu:19125%09red/mmu:76238%09red/mmu:53973%09red/mmu:72962%09red/mmu:11430%09red/mmu:56185%09red/mmu:18113%09red/mmu:337924%09red/mmu:…
Chemical carcinogenesis	KEGG PATHWAY	mmu05204	12	92	1.83e-07	5.92e-06	ENSMUSG00000027890|ENSMUSG00000030711|ENSMUSG00000061906|ENSMUSG00000038656|ENSMUSG00000075551|ENSMUSG00000042248|ENSMUSG00000054417|ENSMUSG00000078798|ENSMUSG00000060613|ENSMUSG00000032310|ENSMUSG00000038776|ENSMUSG00000025004	mmu:14865|mmu:20887|mmu:100559|mmu:13114|mmu:53973|mmu:13096|mmu:337924|mmu:20859|mmu:226105|mmu:13077|mmu:13849|mmu:13099|	14865|20887|100559|13114|53973|13096|337924|20859|226105|13077|13849|13099|	http://www.genome.jp/kegg-bin/show_pathway?mmu05204/mmu:53973%09red/mmu:13114%09red/mmu:226105%09red/mmu:100559%09red/mmu:337924%09red/mmu:14865%09red/mmu:20859%09red/mmu:13849%09red/mmu:13099%09red/mmu:13096%09red/mmu:13077%09red/mmu:20887%09red
Steroid hormone biosynthesis	KEGG PATHWAY	mmu00140	11	86	7.09e-07	1.92e-05	ENSMUSG00000061906|ENSMUSG00000003555|ENSMUSG00000028240|ENSMUSG00000068083|ENSMUSG00000038656|ENSMUSG00000075551|ENSMUSG00000042248|ENSMUSG00000054417|ENSMUSG00000060613|ENSMUSG00000032310|ENSMUSG00000025004	mmu:100559|mmu:13074|mmu:13122|mmu:71754|mmu:13114|mmu:53973|mmu:13096|mmu:337924|mmu:226105|mmu:13077|mmu:13099|	100559|13074|13122|71754|13114|53973|13096|337924|226105|13077|13099|	http://www.genome.jp/kegg-bin/show_pathway?mmu00140/mmu:53973%09red/mmu:13122%09red/mmu:13114%09red/mmu:226105%09red/mmu:100559%09red/mmu:337924%09red/mmu:71754%09red/mmu:13099%09red/mmu:13096%09red/mmu:13074%09red/mmu:13077%09red
Biosynthesis of unsaturated fatty acids	KEGG PATHWAY	mmu01040	6	25	1.11e-05	0.000256801	ENSMUSG00000010651|ENSMUSG00000032349|ENSMUSG00000037071|ENSMUSG00000072949|ENSMUSG00000020777|ENSMUSG00000021226	mmu:235674|mmu:68801|mmu:20249|mmu:26897|mmu:11430|mmu:171210|	235674|68801|20249|26897|11430|171210|	http://www.genome.jp/kegg-bin/show_pathway?mmu01040/mmu:171210%09red/mmu:11430%09red/mmu:20249%09red/mmu:235674%09red/mmu:26897%09red/mmu:68801%09red
Peroxisome	KEGG PATHWAY	mmu04146	9	81	2.06e-05	0.000416337	ENSMUSG00000024066|ENSMUSG00000010651|ENSMUSG00000030545|ENSMUSG00000027870|ENSMUSG00000026853|ENSMUSG00000022853|ENSMUSG00000003623|ENSMUSG00000020777|ENSMUSG00000018796	mmu:22436|mmu:235674|mmu:18631|mmu:56185|mmu:12908|mmu:74147|mmu:74114|mmu:11430|mmu:14081|	22436|235674|18631|56185|12908|74147|74114|11430|14081|	http://www.genome.jp/kegg-bin/show_pathway?mmu04146/mmu:18631%09red/mmu:12908%09red/mmu:74147%09red/mmu:22436%09red/mmu:14081%09red/mmu:11430%09red/mmu:56185%09red/mmu:74114%09red/mmu:235674%09red
Linoleic acid metabolism	KEGG PATHWAY	mmu00591	7	50	4.56e-05	0.000821342	ENSMUSG00000038656|ENSMUSG00000075551|ENSMUSG00000042248|ENSMUSG00000054417|ENSMUSG00000060613|ENSMUSG00000025004|ENSMUSG00000032310	mmu:13114|mmu:53973|mmu:13096|mmu:337924|mmu:226105|mmu:13099|mmu:13077|	13114|53973|13096|337924|226105|13099|13077|	http://www.genome.jp/kegg-bin/show_pathway?mmu00591/mmu:226105%09red/mmu:13114%09red/mmu:53973%09red/mmu:337924%09red/mmu:13099%09red/mmu:13096%09red/mmu:13077%09red
Arachidonic acid metabolism	KEGG PATHWAY	mmu00590	8	90	0.000247581	0.00401081	ENSMUSG00000066072|ENSMUSG00000066071|ENSMUSG00000028712|ENSMUSG00000028715|ENSMUSG00000042248|ENSMUSG00000063929|ENSMUSG00000060613|ENSMUSG00000025004	mmu:13117|mmu:277753|mmu:13117|mmu:13119|mmu:13096|mmu:100040843|mmu:226105|mmu:13099|	13117|277753|13117|13119|13096|100040843|226105|13099|	http://www.genome.jp/kegg-bin/show_pathway?mmu00590/mmu:277753%09red/mmu:226105%09red/mmu:13117%09red/mmu:13119%09red/mmu:100040843%09red/mmu:13099%09red/mmu:13096%09red
Fatty acid metabolism	KEGG PATHWAY	mmu01212	6	50	0.000343706	0.00506186	ENSMUSG00000010651|ENSMUSG00000032349|ENSMUSG00000037071|ENSMUSG00000022853|ENSMUSG00000020777|ENSMUSG00000018796	mmu:235674|mmu:68801|mmu:20249|mmu:74147|mmu:11430|mmu:14081|	235674|68801|20249|74147|11430|14081|	http://www.genome.jp/kegg-bin/show_pathway?mmu01212/mmu:74147%09red/mmu:11430%09red/mmu:14081%09red/mmu:20249%09red/mmu:235674%09red/mmu:68801%09red
Inflammatory mediator regulation of TRP channels	KEGG PATHWAY	mmu04750	9	126	0.000469953	0.00634437	ENSMUSG00000066072|ENSMUSG00000066071|ENSMUSG00000041417|ENSMUSG00000028712|ENSMUSG00000028715|ENSMUSG00000042248|ENSMUSG00000063929|ENSMUSG00000060613|ENSMUSG00000025004	mmu:13117|mmu:277753|mmu:18708|mmu:13117|mmu:13119|mmu:13096|mmu:100040843|mmu:226105|mmu:13099|	13117|277753|18708|13117|13119|13096|100040843|226105|13099|	http://www.genome.jp/kegg-bin/show_pathway?mmu04750/mmu:277753%09red/mmu:226105%09red/mmu:13117%09red/mmu:13119%09red/mmu:100040843%09red/mmu:18708%09red/mmu:13099%09red/mmu:13096%09red
Bile secretion	KEGG PATHWAY	mmu04976	6	72	0.00199712	0.0248872	ENSMUSG00000021670|ENSMUSG00000067144|ENSMUSG00000030237|ENSMUSG00000028240|ENSMUSG00000078798|ENSMUSG00000038776	mmu:15357|mmu:108114|mmu:28250|mmu:13122|mmu:20859|mmu:13849|	15357|108114|28250|13122|20859|13849|	http://www.genome.jp/kegg-bin/show_pathway?mmu04976/mmu:108114%09red/mmu:13122%09red/mmu:15357%09red/mmu:20859%09red/mmu:13849%09red/mmu:28250%09red
Arginine and proline metabolism	KEGG PATHWAY	mmu00330	5	59	0.00439401	0.050845	ENSMUSG00000030934|ENSMUSG00000023262|ENSMUSG00000025533|ENSMUSG00000003526|ENSMUSG00000044005	mmu:18242|mmu:109652|mmu:109900|mmu:19125|mmu:216456|	18242|109652|109900|19125|216456|	http://www.genome.jp/kegg-bin/show_pathway?mmu00330/mmu:109900%09red/mmu:216456%09red/mmu:19125%09red/mmu:18242%09red/mmu:109652%09red
Metabolism of xenobiotics by cytochrome P450	KEGG PATHWAY	mmu00980	5	64	0.00605196	0.0653612	ENSMUSG00000078798|ENSMUSG00000027890|ENSMUSG00000061906|ENSMUSG00000038776|ENSMUSG00000032310	mmu:20859|mmu:14865|mmu:100559|mmu:13849|mmu:13077|	20859|14865|100559|13849|13077|	http://www.genome.jp/kegg-bin/show_pathway?mmu00980/mmu:13077%09red/mmu:14865%09red/mmu:20859%09red/mmu:100559%09red/mmu:13849%09red
Drug metabolism - cytochrome P450	KEGG PATHWAY	mmu00982	5	66	0.00682385	0.0690915	ENSMUSG00000040170|ENSMUSG00000027890|ENSMUSG00000061906|ENSMUSG00000026691|ENSMUSG00000032310	mmu:55990|mmu:14865|mmu:100559|mmu:14262|mmu:13077|	55990|14865|100559|14262|13077|	http://www.genome.jp/kegg-bin/show_pathway?mmu00982/mmu:13077%09red/mmu:14865%09red/mmu:55990%09red/mmu:100559%09red/mmu:14262%09red
Caffeine metabolism	KEGG PATHWAY	mmu00232	2	6	0.00735113	0.0700519	ENSMUSG00000024066|ENSMUSG00000032310	mmu:22436|mmu:13077|	22436|13077|	http://www.genome.jp/kegg-bin/show_pathway?mmu00232/mmu:13077%09red/mmu:22436%09red
Fatty acid elongation	KEGG PATHWAY	mmu00062	3	24	0.0101679	0.0915107	ENSMUSG00000021226|ENSMUSG00000072949|ENSMUSG00000032349	mmu:171210|mmu:26897|mmu:68801|	171210|26897|68801|	http://www.genome.jp/kegg-bin/show_pathway?mmu00062/mmu:171210%09red/mmu:26897%09red/mmu:68801%09red
Circadian rhythm	KEGG PATHWAY	mmu04710	3	31	0.0190877	0.162747	ENSMUSG00000055866|ENSMUSG00000020889|ENSMUSG00000028150	mmu:18627|mmu:217166|mmu:19885|	18627|217166|19885|	http://www.genome.jp/kegg-bin/show_pathway?mmu04710/mmu:217166%09red/mmu:18627%09red/mmu:19885%09red
Alanine, aspartate and glutamate metabolism	KEGG PATHWAY	mmu00250	3	37	0.0292887	0.237239	ENSMUSG00000025533|ENSMUSG00000031700|ENSMUSG00000044005	mmu:109900|mmu:108682|mmu:216456|	109900|108682|216456|	http://www.genome.jp/kegg-bin/show_pathway?mmu00250/mmu:109900%09red/mmu:216456%09red/mmu:108682%09red
Glycine, serine and threonine metabolism	KEGG PATHWAY	mmu00260	3	40	0.0352737	0.242826	ENSMUSG00000035637|ENSMUSG00000074768|ENSMUSG00000032607	mmu:76238|mmu:12116|mmu:434437|	76238|12116|434437|	http://www.genome.jp/kegg-bin/show_pathway?mmu00260/mmu:434437%09red/mmu:76238%09red/mmu:12116%09red
Cysteine and methionine metabolism	KEGG PATHWAY	mmu00270	3	40	0.0352737	0.242826	ENSMUSG00000027597|ENSMUSG00000074768|ENSMUSG00000048087	mmu:269378|mmu:12116|mmu:269378|	269378|12116|269378|	http://www.genome.jp/kegg-bin/show_pathway?mmu00270/mmu:12116%09red/mmu:269378%09red
Fat digestion and absorption	KEGG PATHWAY	mmu04975	3	40	0.0352737	0.242826	ENSMUSG00000032080|ENSMUSG00000002944|ENSMUSG00000054422	mmu:11808|mmu:12491|mmu:14080|	11808|12491|14080|	http://www.genome.jp/kegg-bin/show_pathway?mmu04975/mmu:11808%09red/mmu:12491%09red/mmu:14080%09red
Primary bile acid biosynthesis	KEGG PATHWAY	mmu00120	2	16	0.0359742	0.242826	ENSMUSG00000023963|ENSMUSG00000028240	mmu:56050|mmu:13122|	56050|13122|	http://www.genome.jp/kegg-bin/show_pathway?mmu00120/mmu:56050%09red/mmu:13122%09red
Prolactin signaling pathway	KEGG PATHWAY	mmu04917	4	74	0.0422303	0.273653	ENSMUSG00000041798|ENSMUSG00000003555|ENSMUSG00000041417|ENSMUSG00000019768	mmu:103988|mmu:13074|mmu:18708|mmu:13982|	103988|13074|18708|13982|	http://www.genome.jp/kegg-bin/show_pathway?mmu04917/mmu:13074%09red/mmu:103988%09red/mmu:13982%09red/mmu:18708%09red
2-Oxocarboxylic acid metabolism	KEGG PATHWAY	mmu01210	2	19	0.0477843	0.293824	ENSMUSG00000023262|ENSMUSG00000031700	mmu:109652|mmu:108682|	109652|108682|	http://www.genome.jp/kegg-bin/show_pathway?mmu01210/mmu:108682%09red/mmu:109652%09red
Tryptophan metabolism	KEGG PATHWAY	mmu00380	3	46	0.0489706	0.293824	ENSMUSG00000022853|ENSMUSG00000026348|ENSMUSG00000032310	mmu:74147|mmu:266645|mmu:13077|	74147|266645|13077|	http://www.genome.jp/kegg-bin/show_pathway?mmu00380/mmu:74147%09red/mmu:13077%09red/mmu:266645%09red
Drug metabolism - other enzymes	KEGG PATHWAY	mmu00983	3	52	0.0648733	0.375339	ENSMUSG00000024066|ENSMUSG00000022615|ENSMUSG00000061906	mmu:22436|mmu:72962|mmu:100559|	22436|72962|100559|	http://www.genome.jp/kegg-bin/show_pathway?mmu00983/mmu:22436%09red/mmu:72962%09red/mmu:100559%09red
Vascular smooth muscle contraction	KEGG PATHWAY	mmu04270	5	128	0.0737046	0.404101	ENSMUSG00000066071|ENSMUSG00000066072|ENSMUSG00000028712|ENSMUSG00000028715|ENSMUSG00000063929	mmu:277753|mmu:13117|mmu:13117|mmu:13119|mmu:100040843|	277753|13117|13117|13119|100040843|	http://www.genome.jp/kegg-bin/show_pathway?mmu04270/mmu:277753%09red/mmu:13119%09red/mmu:13117%09red/mmu:100040843%09red
alpha-Linolenic acid metabolism	KEGG PATHWAY	mmu00592	2	25	0.0748335	0.404101	ENSMUSG00000010651|ENSMUSG00000020777	mmu:235674|mmu:11430|	235674|11430|	http://www.genome.jp/kegg-bin/show_pathway?mmu00592/mmu:235674%09red/mmu:11430%09red
Glyoxylate and dicarboxylate metabolism	KEGG PATHWAY	mmu00630	2	26	0.0797246	0.416625	ENSMUSG00000027870|ENSMUSG00000035637	mmu:56185|mmu:76238|	56185|76238|	http://www.genome.jp/kegg-bin/show_pathway?mmu00630/mmu:76238%09red/mmu:56185%09red
Ascorbate and aldarate metabolism	KEGG PATHWAY	mmu00053	2	27	0.0847121	0.428855	ENSMUSG00000061906|ENSMUSG00000034450	mmu:100559|mmu:268756|	100559|268756|	http://www.genome.jp/kegg-bin/show_pathway?mmu00053/mmu:268756%09red/mmu:100559%09red
Butirosin and neomycin biosynthesis	KEGG PATHWAY	mmu00524	1	5	0.0965252	0.473851	ENSMUSG00000041798	mmu:103988|	103988|	http://www.genome.jp/kegg-bin/show_pathway?mmu00524/mmu:103988%09red
Nicotinate and nicotinamide metabolism	KEGG PATHWAY	mmu00760	2	32	0.110939	0.528592	ENSMUSG00000032271|ENSMUSG00000020572	mmu:18113|mmu:59027|	18113|59027|	http://www.genome.jp/kegg-bin/show_pathway?mmu00760/mmu:59027%09red/mmu:18113%09red
Carbon metabolism	KEGG PATHWAY	mmu01200	4	111	0.128282	0.593762	ENSMUSG00000041798|ENSMUSG00000032607|ENSMUSG00000031700|ENSMUSG00000022853	mmu:103988|mmu:434437|mmu:108682|mmu:74147|	103988|434437|108682|74147|	http://www.genome.jp/kegg-bin/show_pathway?mmu01200/mmu:434437%09red/mmu:74147%09red/mmu:103988%09red/mmu:108682%09red
Pentose and glucuronate interconversions	KEGG PATHWAY	mmu00040	2	36	0.13322	0.599488	ENSMUSG00000061906|ENSMUSG00000027227	mmu:100559|mmu:20322|	100559|20322|	http://www.genome.jp/kegg-bin/show_pathway?mmu00040/mmu:100559%09red/mmu:20322%09red
Taurine and hypotaurine metabolism	KEGG PATHWAY	mmu00430	1	8	0.141243	0.612669	ENSMUSG00000023044	mmu:246277|	246277|	http://www.genome.jp/kegg-bin/show_pathway?mmu00430/mmu:246277%09red
Thyroid hormone signaling pathway	KEGG PATHWAY	mmu04919	4	118	0.149415	0.612669	ENSMUSG00000022951|ENSMUSG00000019768|ENSMUSG00000041417|ENSMUSG00000034785	mmu:54720|mmu:13982|mmu:18708|mmu:13370|	54720|13982|18708|13370|	http://www.genome.jp/kegg-bin/show_pathway?mmu04919/mmu:13370%09red/mmu:13982%09red/mmu:54720%09red/mmu:18708%09red
Complement and coagulation cascades	KEGG PATHWAY	mmu04610	3	77	0.151071	0.612669	ENSMUSG00000079015|ENSMUSG00000090555|ENSMUSG00000066366	mmu:20702|mmu:20700|mmu:20700|	20702|20700|20700|	http://www.genome.jp/kegg-bin/show_pathway?mmu04610/mmu:20700%09red/mmu:20702%09red
Amoebiasis	KEGG PATHWAY	mmu05146	4	119	0.152538	0.612669	ENSMUSG00000045672|ENSMUSG00000044734|ENSMUSG00000004951|ENSMUSG00000041417	mmu:373864|mmu:66222|mmu:15507|mmu:18708|	373864|66222|15507|18708|	http://www.genome.jp/kegg-bin/show_pathway?mmu05146/mmu:373864%09red/mmu:66222%09red/mmu:15507%09red/mmu:18708%09red
Biosynthesis of amino acids	KEGG PATHWAY	mmu01230	3	78	0.155058	0.612669	ENSMUSG00000023262|ENSMUSG00000025533|ENSMUSG00000031700	mmu:109652|mmu:109900|mmu:108682|	109652|109900|108682|	http://www.genome.jp/kegg-bin/show_pathway?mmu01230/mmu:109900%09red/mmu:108682%09red/mmu:109652%09red
AMPK signaling pathway	KEGG PATHWAY	mmu04152	4	129	0.185045	0.69236	ENSMUSG00000037071|ENSMUSG00000021670|ENSMUSG00000002944|ENSMUSG00000041417	mmu:20249|mmu:15357|mmu:12491|mmu:18708|	20249|15357|12491|18708|	http://www.genome.jp/kegg-bin/show_pathway?mmu04152/mmu:15357%09red/mmu:12491%09red/mmu:18708%09red/mmu:20249%09red
Carbohydrate digestion and absorption	KEGG PATHWAY	mmu04973	2	45	0.186303	0.69236	ENSMUSG00000032114|ENSMUSG00000041417	mmu:14385|mmu:18708|	14385|18708|	http://www.genome.jp/kegg-bin/show_pathway?mmu04973/mmu:14385%09red/mmu:18708%09red
Hematopoietic cell lineage	KEGG PATHWAY	mmu04640	3	86	0.188048	0.69236	ENSMUSG00000030342|ENSMUSG00000002944|ENSMUSG00000022797	mmu:12527|mmu:12491|mmu:22042|	12527|12491|22042|	http://www.genome.jp/kegg-bin/show_pathway?mmu04640/mmu:12491%09red/mmu:22042%09red/mmu:12527%09red
Serotonergic synapse	KEGG PATHWAY	mmu04726	4	133	0.198635	0.715087	ENSMUSG00000060613|ENSMUSG00000025004|ENSMUSG00000042248|ENSMUSG00000068083	mmu:226105|mmu:13099|mmu:13096|mmu:71754|	226105|13099|13096|71754|	http://www.genome.jp/kegg-bin/show_pathway?mmu04726/mmu:71754%09red/mmu:13096%09red/mmu:226105%09red/mmu:13099%09red
Type II diabetes mellitus	KEGG PATHWAY	mmu04930	2	50	0.216918	0.753015	ENSMUSG00000041798|ENSMUSG00000041417	mmu:103988|mmu:18708|	103988|18708|	http://www.genome.jp/kegg-bin/show_pathway?mmu04930/mmu:103988%09red/mmu:18708%09red
Fatty acid biosynthesis	KEGG PATHWAY	mmu00061	1	14	0.224163	0.753015	ENSMUSG00000018796	mmu:14081|	14081|	http://www.genome.jp/kegg-bin/show_pathway?mmu00061/mmu:14081%09red
Valine, leucine and isoleucine degradation	KEGG PATHWAY	mmu00280	2	52	0.22929	0.753015	ENSMUSG00000022853|ENSMUSG00000010651	mmu:74147|mmu:235674|	74147|235674|	http://www.genome.jp/kegg-bin/show_pathway?mmu00280/mmu:235674%09red/mmu:74147%09red
Insulin signaling pathway	KEGG PATHWAY	mmu04910	4	142	0.230231	0.753015	ENSMUSG00000046794|ENSMUSG00000041798|ENSMUSG00000067279|ENSMUSG00000041417	mmu:244416|mmu:103988|mmu:53412|mmu:18708|	244416|103988|53412|18708|	http://www.genome.jp/kegg-bin/show_pathway?mmu04910/mmu:244416%09red/mmu:103988%09red/mmu:53412%09red/mmu:18708%09red
Glycosphingolipid biosynthesis - ganglio series	KEGG PATHWAY	mmu00604	1	15	0.237185	0.753015	ENSMUSG00000056091	mmu:20454|	20454|	http://www.genome.jp/kegg-bin/show_pathway?mmu00604/mmu:20454%09red
Estrogen signaling pathway	KEGG PATHWAY	mmu04915	3	98	0.240373	0.753015	ENSMUSG00000090877|ENSMUSG00000041417|ENSMUSG00000019768	mmu:15511|mmu:18708|mmu:13982|	15511|18708|13982|	http://www.genome.jp/kegg-bin/show_pathway?mmu04915/mmu:13982%09red/mmu:15511%09red/mmu:18708%09red
Starch and sucrose metabolism	KEGG PATHWAY	mmu00500	2	54	0.241708	0.753015	ENSMUSG00000041798|ENSMUSG00000061906	mmu:103988|mmu:100559|	103988|100559|	http://www.genome.jp/kegg-bin/show_pathway?mmu00500/mmu:103988%09red/mmu:100559%09red
Pantothenate and CoA biosynthesis	KEGG PATHWAY	mmu00770	1	17	0.262577	0.799843	ENSMUSG00000037440	mmu:22361|	22361|	http://www.genome.jp/kegg-bin/show_pathway?mmu00770/mmu:22361%09red
Ovarian steroidogenesis	KEGG PATHWAY	mmu04913	2	58	0.266614	0.799843	ENSMUSG00000021226|ENSMUSG00000003555	mmu:171210|mmu:13074|	171210|13074|	http://www.genome.jp/kegg-bin/show_pathway?mmu04913/mmu:13074%09red/mmu:171210%09red
VEGF signaling pathway	KEGG PATHWAY	mmu04370	2	60	0.279072	0.821995	ENSMUSG00000004951|ENSMUSG00000041417	mmu:15507|mmu:18708|	15507|18708|	http://www.genome.jp/kegg-bin/show_pathway?mmu04370/mmu:15507%09red/mmu:18708%09red
One carbon pool by folate	KEGG PATHWAY	mmu00670	1	19	0.287126	0.830616	ENSMUSG00000032607	mmu:434437|	434437|	http://www.genome.jp/kegg-bin/show_pathway?mmu00670/mmu:434437%09red
Terpenoid backbone biosynthesis	KEGG PATHWAY	mmu00900	1	21	0.31086	0.874407	ENSMUSG00000021670	mmu:15357|	15357|	http://www.genome.jp/kegg-bin/show_pathway?mmu00900/mmu:15357%09red
Glutamatergic synapse	KEGG PATHWAY	mmu04724	3	114	0.313059	0.874407	ENSMUSG00000025813|ENSMUSG00000005089|ENSMUSG00000044005	mmu:26557|mmu:20511|mmu:216456|	26557|20511|216456|	http://www.genome.jp/kegg-bin/show_pathway?mmu04724/mmu:216456%09red/mmu:26557%09red/mmu:20511%09red
Proximal tubule bicarbonate reclamation	KEGG PATHWAY	mmu04964	1	22	0.32243	0.885316	ENSMUSG00000044005	mmu:216456|	216456|	http://www.genome.jp/kegg-bin/show_pathway?mmu04964/mmu:216456%09red
Phenylalanine metabolism	KEGG PATHWAY	mmu00360	1	23	0.333806	0.901275	ENSMUSG00000071633	mmu:240549|	240549|	http://www.genome.jp/kegg-bin/show_pathway?mmu00360/mmu:240549%09red
Vitamin digestion and absorption	KEGG PATHWAY	mmu04977	1	24	0.344991	0.916205	ENSMUSG00000032080	mmu:11808|	11808|	http://www.genome.jp/kegg-bin/show_pathway?mmu04977/mmu:11808%09red
Adipocytokine signaling pathway	KEGG PATHWAY	mmu04920	2	72	0.353081	0.922566	ENSMUSG00000002944|ENSMUSG00000018796	mmu:12491|mmu:14081|	12491|14081|	http://www.genome.jp/kegg-bin/show_pathway?mmu04920/mmu:14081%09red/mmu:12491%09red
Maturity onset diabetes of the young	KEGG PATHWAY	mmu04950	1	26	0.366803	0.928469	ENSMUSG00000041798	mmu:103988|	103988|	http://www.genome.jp/kegg-bin/show_pathway?mmu04950/mmu:103988%09red
Butanoate metabolism	KEGG PATHWAY	mmu00650	1	26	0.366803	0.928469	ENSMUSG00000022853	mmu:74147|	74147|	http://www.genome.jp/kegg-bin/show_pathway?mmu00650/mmu:74147%09red
Propanoate metabolism	KEGG PATHWAY	mmu00640	1	27	0.377435	0.940684	ENSMUSG00000022853	mmu:74147|	74147|	http://www.genome.jp/kegg-bin/show_pathway?mmu00640/mmu:74147%09red
FoxO signaling pathway	KEGG PATHWAY	mmu04068	3	135	0.4088	0.99598	ENSMUSG00000017868|ENSMUSG00000041417|ENSMUSG00000025813	mmu:27219|mmu:18708|mmu:26557|	27219|18708|26557|	http://www.genome.jp/kegg-bin/show_pathway?mmu04068/mmu:26557%09red/mmu:27219%09red/mmu:18708%09red
beta-Alanine metabolism	KEGG PATHWAY	mmu00410	1	32	0.427985	0.99598	ENSMUSG00000022853	mmu:74147|	74147|	http://www.genome.jp/kegg-bin/show_pathway?mmu00410/mmu:74147%09red
Galactose metabolism	KEGG PATHWAY	mmu00052	1	33	0.437592	0.99598	ENSMUSG00000041798	mmu:103988|	103988|	http://www.genome.jp/kegg-bin/show_pathway?mmu00052/mmu:103988%09red
ECM-receptor interaction	KEGG PATHWAY	mmu04512	2	88	0.447132	0.99598	ENSMUSG00000045672|ENSMUSG00000002944	mmu:373864|mmu:12491|	373864|12491|	http://www.genome.jp/kegg-bin/show_pathway?mmu04512/mmu:373864%09red/mmu:12491%09red
Fructose and mannose metabolism	KEGG PATHWAY	mmu00051	1	35	0.456327	0.99598	ENSMUSG00000027227	mmu:20322|	20322|	http://www.genome.jp/kegg-bin/show_pathway?mmu00051/mmu:20322%09red
Glycerophospholipid metabolism	KEGG PATHWAY	mmu00564	2	91	0.463925	0.99598	ENSMUSG00000024843|ENSMUSG00000023019	mmu:12660|mmu:14555|	12660|14555|	http://www.genome.jp/kegg-bin/show_pathway?mmu00564/mmu:12660%09red/mmu:14555%09red
Bladder cancer	KEGG PATHWAY	mmu05219	1	38	0.483267	0.99598	ENSMUSG00000022615	mmu:72962|	72962|	http://www.genome.jp/kegg-bin/show_pathway?mmu05219/mmu:72962%09red
Pyruvate metabolism	KEGG PATHWAY	mmu00620	1	39	0.491948	0.99598	ENSMUSG00000035637	mmu:76238|	76238|	http://www.genome.jp/kegg-bin/show_pathway?mmu00620/mmu:76238%09red
Porphyrin and chlorophyll metabolism	KEGG PATHWAY	mmu00860	1	40	0.500484	0.99598	ENSMUSG00000061906	mmu:100559|	100559|	http://www.genome.jp/kegg-bin/show_pathway?mmu00860/mmu:100559%09red
Aldosterone-regulated sodium reabsorption	KEGG PATHWAY	mmu04960	1	40	0.500484	0.99598	ENSMUSG00000041417	mmu:18708|	18708|	http://www.genome.jp/kegg-bin/show_pathway?mmu04960/mmu:18708%09red
Influenza A	KEGG PATHWAY	mmu05164	3	170	0.556944	0.99598	ENSMUSG00000090877|ENSMUSG00000005483|ENSMUSG00000041417	mmu:15511|mmu:81489|mmu:18708|	15511|81489|18708|	http://www.genome.jp/kegg-bin/show_pathway?mmu05164/mmu:81489%09red/mmu:15511%09red/mmu:18708%09red
Amino sugar and nucleotide sugar metabolism	KEGG PATHWAY	mmu00520	1	48	0.563813	0.99598	ENSMUSG00000041798	mmu:103988|	103988|	http://www.genome.jp/kegg-bin/show_pathway?mmu00520/mmu:103988%09red
Malaria	KEGG PATHWAY	mmu05144	1	48	0.563813	0.99598	ENSMUSG00000002944	mmu:12491|	12491|	http://www.genome.jp/kegg-bin/show_pathway?mmu05144/mmu:12491%09red
HIF-1 signaling pathway	KEGG PATHWAY	mmu04066	2	111	0.567678	0.99598	ENSMUSG00000041417|ENSMUSG00000022797	mmu:18708|mmu:22042|	18708|22042|	http://www.genome.jp/kegg-bin/show_pathway?mmu04066/mmu:22042%09red/mmu:18708%09red
Alzheimer's disease	KEGG PATHWAY	mmu05010	3	173	0.568599	0.99598	ENSMUSG00000015568|ENSMUSG00000100862|ENSMUSG00000102070	mmu:16956|mmu:17705|mmu:17709|	16956|17705|17709|	http://www.genome.jp/kegg-bin/show_pathway?mmu05010/mmu:17709%09red/mmu:16956%09red/mmu:17705%09red
Toxoplasmosis	KEGG PATHWAY	mmu05145	2	113	0.577224	0.99598	ENSMUSG00000090877|ENSMUSG00000041417	mmu:15511|mmu:18708|	15511|18708|	http://www.genome.jp/kegg-bin/show_pathway?mmu05145/mmu:15511%09red/mmu:18708%09red
Lysine degradation	KEGG PATHWAY	mmu00310	1	51	0.585439	0.99598	ENSMUSG00000022853	mmu:74147|	74147|	http://www.genome.jp/kegg-bin/show_pathway?mmu00310/mmu:74147%09red
Endometrial cancer	KEGG PATHWAY	mmu05213	1	52	0.592407	0.99598	ENSMUSG00000041417	mmu:18708|	18708|	http://www.genome.jp/kegg-bin/show_pathway?mmu05213/mmu:18708%09red
Amyotrophic lateral sclerosis (ALS)	KEGG PATHWAY	mmu05014	1	52	0.592407	0.99598	ENSMUSG00000005089	mmu:20511|	20511|	http://www.genome.jp/kegg-bin/show_pathway?mmu05014/mmu:20511%09red
Glutathione metabolism	KEGG PATHWAY	mmu00480	1	53	0.599258	0.99598	ENSMUSG00000027890	mmu:14865|	14865|	http://www.genome.jp/kegg-bin/show_pathway?mmu00480/mmu:14865%09red
Endocrine and other factor-regulated calcium reabsorption	KEGG PATHWAY	mmu04961	1	55	0.612618	0.99598	ENSMUSG00000019768	mmu:13982|	13982|	http://www.genome.jp/kegg-bin/show_pathway?mmu04961/mmu:13982%09red
Glycerolipid metabolism	KEGG PATHWAY	mmu00561	1	55	0.612618	0.99598	ENSMUSG00000015568	mmu:16956|	16956|	http://www.genome.jp/kegg-bin/show_pathway?mmu00561/mmu:16956%09red
Non-small cell lung cancer	KEGG PATHWAY	mmu05223	1	56	0.61913	0.99598	ENSMUSG00000041417	mmu:18708|	18708|	http://www.genome.jp/kegg-bin/show_pathway?mmu05223/mmu:18708%09red
Neurotrophin signaling pathway	KEGG PATHWAY	mmu04722	2	123	0.622628	0.99598	ENSMUSG00000055254|ENSMUSG00000041417	mmu:18212|mmu:18708|	18212|18708|	http://www.genome.jp/kegg-bin/show_pathway?mmu04722/mmu:18708%09red/mmu:18212%09red
Acute myeloid leukemia	KEGG PATHWAY	mmu05221	1	57	0.625533	0.99598	ENSMUSG00000041417	mmu:18708|	18708|	http://www.genome.jp/kegg-bin/show_pathway?mmu05221/mmu:18708%09red
Legionellosis	KEGG PATHWAY	mmu05134	1	58	0.631829	0.99598	ENSMUSG00000090877	mmu:15511|	15511|	http://www.genome.jp/kegg-bin/show_pathway?mmu05134/mmu:15511%09red
Inflammatory bowel disease (IBD)	KEGG PATHWAY	mmu05321	1	59	0.638019	0.99598	ENSMUSG00000028150	mmu:19885|	19885|	http://www.genome.jp/kegg-bin/show_pathway?mmu05321/mmu:19885%09red
mTOR signaling pathway	KEGG PATHWAY	mmu04150	1	61	0.650089	0.99598	ENSMUSG00000041417	mmu:18708|	18708|	http://www.genome.jp/kegg-bin/show_pathway?mmu04150/mmu:18708%09red
Platelet activation	KEGG PATHWAY	mmu04611	2	131	0.656171	0.99598	ENSMUSG00000045672|ENSMUSG00000041417	mmu:373864|mmu:18708|	373864|18708|	http://www.genome.jp/kegg-bin/show_pathway?mmu04611/mmu:373864%09red/mmu:18708%09red
Colorectal cancer	KEGG PATHWAY	mmu05210	1	64	0.667446	0.99598	ENSMUSG00000041417	mmu:18708|	18708|	http://www.genome.jp/kegg-bin/show_pathway?mmu05210/mmu:18708%09red
Oxidative phosphorylation	KEGG PATHWAY	mmu00190	2	135	0.67203	0.99598	ENSMUSG00000100862|ENSMUSG00000102070	mmu:17705|mmu:17709|	17705|17709|	http://www.genome.jp/kegg-bin/show_pathway?mmu00190/mmu:17709%09red/mmu:17705%09red
Glycolysis / Gluconeogenesis	KEGG PATHWAY	mmu00010	1	65	0.673039	0.99598	ENSMUSG00000041798	mmu:103988|	103988|	http://www.genome.jp/kegg-bin/show_pathway?mmu00010/mmu:103988%09red
Glioma	KEGG PATHWAY	mmu05214	1	65	0.673039	0.99598	ENSMUSG00000041417	mmu:18708|	18708|	http://www.genome.jp/kegg-bin/show_pathway?mmu05214/mmu:18708%09red
Pancreatic cancer	KEGG PATHWAY	mmu05212	1	66	0.678537	0.99598	ENSMUSG00000041417	mmu:18708|	18708|	http://www.genome.jp/kegg-bin/show_pathway?mmu05212/mmu:18708%09red
Measles	KEGG PATHWAY	mmu05162	2	137	0.679735	0.99598	ENSMUSG00000090877|ENSMUSG00000041417	mmu:15511|mmu:18708|	15511|18708|	http://www.genome.jp/kegg-bin/show_pathway?mmu05162/mmu:15511%09red/mmu:18708%09red
Renal cell carcinoma	KEGG PATHWAY	mmu05211	1	67	0.683944	0.99598	ENSMUSG00000041417	mmu:18708|	18708|	http://www.genome.jp/kegg-bin/show_pathway?mmu05211/mmu:18708%09red
Fc epsilon RI signaling pathway	KEGG PATHWAY	mmu04664	1	70	0.699625	0.99598	ENSMUSG00000041417	mmu:18708|	18708|	http://www.genome.jp/kegg-bin/show_pathway?mmu04664/mmu:18708%09red
Epstein-Barr virus infection	KEGG PATHWAY	mmu05169	3	212	0.701983	0.99598	ENSMUSG00000090877|ENSMUSG00000004951|ENSMUSG00000041417	mmu:15511|mmu:15507|mmu:18708|	15511|15507|18708|	http://www.genome.jp/kegg-bin/show_pathway?mmu05169/mmu:15507%09red/mmu:15511%09red/mmu:18708%09red
Melanoma	KEGG PATHWAY	mmu05218	1	71	0.704678	0.99598	ENSMUSG00000041417	mmu:18708|	18708|	http://www.genome.jp/kegg-bin/show_pathway?mmu05218/mmu:18708%09red
B cell receptor signaling pathway	KEGG PATHWAY	mmu04662	1	73	0.71453	0.99598	ENSMUSG00000041417	mmu:18708|	18708|	http://www.genome.jp/kegg-bin/show_pathway?mmu04662/mmu:18708%09red
Chronic myeloid leukemia	KEGG PATHWAY	mmu05220	1	73	0.71453	0.99598	ENSMUSG00000041417	mmu:18708|	18708|	http://www.genome.jp/kegg-bin/show_pathway?mmu05220/mmu:18708%09red
Parkinson's disease	KEGG PATHWAY	mmu05012	2	147	0.716064	0.99598	ENSMUSG00000100862|ENSMUSG00000102070	mmu:17705|mmu:17709|	17705|17709|	http://www.genome.jp/kegg-bin/show_pathway?mmu05012/mmu:17709%09red/mmu:17705%09red
Bacterial invasion of epithelial cells	KEGG PATHWAY	mmu05100	1	77	0.733262	0.99598	ENSMUSG00000041417	mmu:18708|	18708|	http://www.genome.jp/kegg-bin/show_pathway?mmu05100/mmu:18708%09red
Cardiac muscle contraction	KEGG PATHWAY	mmu04260	1	78	0.73775	0.99598	ENSMUSG00000102070	mmu:17709|	17709|	http://www.genome.jp/kegg-bin/show_pathway?mmu04260/mmu:17709%09red
Non-alcoholic fatty liver disease (NAFLD)	KEGG PATHWAY	mmu04932	2	154	0.739387	0.99598	ENSMUSG00000041417|ENSMUSG00000102070	mmu:18708|mmu:17709|	18708|17709|	http://www.genome.jp/kegg-bin/show_pathway?mmu04932/mmu:17709%09red/mmu:18708%09red
Antigen processing and presentation	KEGG PATHWAY	mmu04612	1	81	0.750767	0.99598	ENSMUSG00000090877	mmu:15511|	15511|	http://www.genome.jp/kegg-bin/show_pathway?mmu04612/mmu:15511%09red
Phosphatidylinositol signaling system	KEGG PATHWAY	mmu04070	1	81	0.750767	0.99598	ENSMUSG00000041417	mmu:18708|	18708|	http://www.genome.jp/kegg-bin/show_pathway?mmu04070/mmu:18708%09red
Oxytocin signaling pathway	KEGG PATHWAY	mmu04921	2	158	0.751967	0.99598	ENSMUSG00000041417|ENSMUSG00000022951	mmu:18708|mmu:54720|	18708|54720|	http://www.genome.jp/kegg-bin/show_pathway?mmu04921/mmu:54720%09red/mmu:18708%09red
Apoptosis	KEGG PATHWAY	mmu04210	1	82	0.754961	0.99598	ENSMUSG00000041417	mmu:18708|	18708|	http://www.genome.jp/kegg-bin/show_pathway?mmu04210/mmu:18708%09red
Small cell lung cancer	KEGG PATHWAY	mmu05222	1	85	0.767126	0.99598	ENSMUSG00000041417	mmu:18708|	18708|	http://www.genome.jp/kegg-bin/show_pathway?mmu05222/mmu:18708%09red
Insulin secretion	KEGG PATHWAY	mmu04911	1	86	0.771045	0.99598	ENSMUSG00000041798	mmu:103988|	103988|	http://www.genome.jp/kegg-bin/show_pathway?mmu04911/mmu:103988%09red
Progesterone-mediated oocyte maturation	KEGG PATHWAY	mmu04914	1	87	0.774899	0.99598	ENSMUSG00000041417	mmu:18708|	18708|	http://www.genome.jp/kegg-bin/show_pathway?mmu04914/mmu:18708%09red
ErbB signaling pathway	KEGG PATHWAY	mmu04012	1	87	0.774899	0.99598	ENSMUSG00000041417	mmu:18708|	18708|	http://www.genome.jp/kegg-bin/show_pathway?mmu04012/mmu:18708%09red
Fc gamma R-mediated phagocytosis	KEGG PATHWAY	mmu04666	1	88	0.778688	0.99598	ENSMUSG00000041417	mmu:18708|	18708|	http://www.genome.jp/kegg-bin/show_pathway?mmu04666/mmu:18708%09red
Protein digestion and absorption	KEGG PATHWAY	mmu04974	1	89	0.782413	0.99598	ENSMUSG00000045672	mmu:373864|	373864|	http://www.genome.jp/kegg-bin/show_pathway?mmu04974/mmu:373864%09red
GABAergic synapse	KEGG PATHWAY	mmu04727	1	89	0.782413	0.99598	ENSMUSG00000044005	mmu:216456|	216456|	http://www.genome.jp/kegg-bin/show_pathway?mmu04727/mmu:216456%09red
Prostate cancer	KEGG PATHWAY	mmu05215	1	89	0.782413	0.99598	ENSMUSG00000041417	mmu:18708|	18708|	http://www.genome.jp/kegg-bin/show_pathway?mmu05215/mmu:18708%09red
Protein processing in endoplasmic reticulum	KEGG PATHWAY	mmu04141	2	169	0.783896	0.99598	ENSMUSG00000090877|ENSMUSG00000005483	mmu:15511|mmu:81489|	15511|81489|	http://www.genome.jp/kegg-bin/show_pathway?mmu04141/mmu:81489%09red/mmu:15511%09red
Phagosome	KEGG PATHWAY	mmu04145	2	174	0.797179	0.99598	ENSMUSG00000002944|ENSMUSG00000022797	mmu:12491|mmu:22042|	12491|22042|	http://www.genome.jp/kegg-bin/show_pathway?mmu04145/mmu:12491%09red/mmu:22042%09red
MAPK signaling pathway	KEGG PATHWAY	mmu04010	3	253	0.805799	0.99598	ENSMUSG00000090877|ENSMUSG00000004951|ENSMUSG00000055254	mmu:15511|mmu:15507|mmu:18212|	15511|15507|18212|	http://www.genome.jp/kegg-bin/show_pathway?mmu04010/mmu:15507%09red/mmu:15511%09red/mmu:18212%09red
Circadian entrainment	KEGG PATHWAY	mmu04713	1	98	0.813248	0.99598	ENSMUSG00000055866	mmu:18627|	18627|	http://www.genome.jp/kegg-bin/show_pathway?mmu04713/mmu:18627%09red
Huntington's disease	KEGG PATHWAY	mmu05016	2	182	0.816933	0.99598	ENSMUSG00000100862|ENSMUSG00000102070	mmu:17705|mmu:17709|	17705|17709|	http://www.genome.jp/kegg-bin/show_pathway?mmu05016/mmu:17709%09red/mmu:17705%09red
Toll-like receptor signaling pathway	KEGG PATHWAY	mmu04620	1	101	0.822525	0.99598	ENSMUSG00000041417	mmu:18708|	18708|	http://www.genome.jp/kegg-bin/show_pathway?mmu04620/mmu:18708%09red
Chagas disease (American trypanosomiasis)	KEGG PATHWAY	mmu05142	1	103	0.828453	0.99598	ENSMUSG00000041417	mmu:18708|	18708|	http://www.genome.jp/kegg-bin/show_pathway?mmu05142/mmu:18708%09red
Pyrimidine metabolism	KEGG PATHWAY	mmu00240	1	103	0.828453	0.99598	ENSMUSG00000022615	mmu:72962|	72962|	http://www.genome.jp/kegg-bin/show_pathway?mmu00240/mmu:72962%09red
T cell receptor signaling pathway	KEGG PATHWAY	mmu04660	1	105	0.834183	0.99598	ENSMUSG00000041417	mmu:18708|	18708|	http://www.genome.jp/kegg-bin/show_pathway?mmu04660/mmu:18708%09red
TNF signaling pathway	KEGG PATHWAY	mmu04668	1	109	0.845077	0.99598	ENSMUSG00000041417	mmu:18708|	18708|	http://www.genome.jp/kegg-bin/show_pathway?mmu04668/mmu:18708%09red
cAMP signaling pathway	KEGG PATHWAY	mmu04024	2	198	0.851351	0.99598	ENSMUSG00000041417|ENSMUSG00000020777	mmu:18708|mmu:11430|	18708|11430|	http://www.genome.jp/kegg-bin/show_pathway?mmu04024/mmu:11430%09red/mmu:18708%09red
Cholinergic synapse	KEGG PATHWAY	mmu04725	1	113	0.855257	0.99598	ENSMUSG00000041417	mmu:18708|	18708|	http://www.genome.jp/kegg-bin/show_pathway?mmu04725/mmu:18708%09red
Proteoglycans in cancer	KEGG PATHWAY	mmu05205	2	205	0.864471	0.99598	ENSMUSG00000041417|ENSMUSG00000019768	mmu:18708|mmu:13982|	18708|13982|	http://www.genome.jp/kegg-bin/show_pathway?mmu05205/mmu:13982%09red/mmu:18708%09red
Focal adhesion	KEGG PATHWAY	mmu04510	2	207	0.86802	0.99598	ENSMUSG00000045672|ENSMUSG00000041417	mmu:373864|mmu:18708|	373864|18708|	http://www.genome.jp/kegg-bin/show_pathway?mmu04510/mmu:373864%09red/mmu:18708%09red
Natural killer cell mediated cytotoxicity	KEGG PATHWAY	mmu04650	1	119	0.869288	0.99598	ENSMUSG00000041417	mmu:18708|	18708|	http://www.genome.jp/kegg-bin/show_pathway?mmu04650/mmu:18708%09red
Leukocyte transendothelial migration	KEGG PATHWAY	mmu04670	1	121	0.873657	0.99598	ENSMUSG00000041417	mmu:18708|	18708|	http://www.genome.jp/kegg-bin/show_pathway?mmu04670/mmu:18708%09red
Lysosome	KEGG PATHWAY	mmu04142	1	123	0.877881	0.99598	ENSMUSG00000004552	mmu:13034|	13034|	http://www.genome.jp/kegg-bin/show_pathway?mmu04142/mmu:13034%09red
Osteoclast differentiation	KEGG PATHWAY	mmu04380	1	126	0.883953	0.99598	ENSMUSG00000041417	mmu:18708|	18708|	http://www.genome.jp/kegg-bin/show_pathway?mmu04380/mmu:18708%09red
Spliceosome	KEGG PATHWAY	mmu03040	1	132	0.895208	0.99598	ENSMUSG00000090877	mmu:15511|	15511|	http://www.genome.jp/kegg-bin/show_pathway?mmu03040/mmu:15511%09red
Hepatitis C	KEGG PATHWAY	mmu05160	1	136	0.9021	0.99598	ENSMUSG00000041417	mmu:18708|	18708|	http://www.genome.jp/kegg-bin/show_pathway?mmu05160/mmu:18708%09red
Tight junction	KEGG PATHWAY	mmu04530	1	136	0.9021	0.99598	ENSMUSG00000034917	mmu:27375|	27375|	http://www.genome.jp/kegg-bin/show_pathway?mmu04530/mmu:27375%09red
Endocytosis	KEGG PATHWAY	mmu04144	2	231	0.904428	0.99598	ENSMUSG00000090877|ENSMUSG00000022797	mmu:15511|mmu:22042|	15511|22042|	http://www.genome.jp/kegg-bin/show_pathway?mmu04144/mmu:15511%09red/mmu:22042%09red
Signaling pathways regulating pluripotency of stem cells	KEGG PATHWAY	mmu04550	1	140	0.90854	0.99598	ENSMUSG00000041417	mmu:18708|	18708|	http://www.genome.jp/kegg-bin/show_pathway?mmu04550/mmu:18708%09red
Hepatitis B	KEGG PATHWAY	mmu05161	1	145	0.915998	0.99598	ENSMUSG00000041417	mmu:18708|	18708|	http://www.genome.jp/kegg-bin/show_pathway?mmu05161/mmu:18708%09red
Adrenergic signaling in cardiomyocytes	KEGG PATHWAY	mmu04261	1	151	0.924151	0.99598	ENSMUSG00000041417	mmu:18708|	18708|	http://www.genome.jp/kegg-bin/show_pathway?mmu04261/mmu:18708%09red
Jak-STAT signaling pathway	KEGG PATHWAY	mmu04630	1	155	0.929143	0.99598	ENSMUSG00000041417	mmu:18708|	18708|	http://www.genome.jp/kegg-bin/show_pathway?mmu04630/mmu:18708%09red
PI3K-Akt signaling pathway	KEGG PATHWAY	mmu04151	3	351	0.938005	0.99598	ENSMUSG00000045672|ENSMUSG00000017868|ENSMUSG00000041417	mmu:373864|mmu:27219|mmu:18708|	373864|27219|18708|	http://www.genome.jp/kegg-bin/show_pathway?mmu04151/mmu:27219%09red/mmu:373864%09red/mmu:18708%09red
cGMP-PKG signaling pathway	KEGG PATHWAY	mmu04022	1	170	0.945114	0.99598	ENSMUSG00000041417	mmu:18708|	18708|	http://www.genome.jp/kegg-bin/show_pathway?mmu04022/mmu:18708%09red
Transcriptional misregulation in cancer	KEGG PATHWAY	mmu05202	1	178	0.952106	0.99598	ENSMUSG00000055866	mmu:18627|	18627|	http://www.genome.jp/kegg-bin/show_pathway?mmu05202/mmu:18627%09red
Purine metabolism	KEGG PATHWAY	mmu00230	1	179	0.952915	0.99598	ENSMUSG00000024066	mmu:22436|	22436|	http://www.genome.jp/kegg-bin/show_pathway?mmu00230/mmu:22436%09red
Chemokine signaling pathway	KEGG PATHWAY	mmu04062	1	196	0.964759	0.99598	ENSMUSG00000041417	mmu:18708|	18708|	http://www.genome.jp/kegg-bin/show_pathway?mmu04062/mmu:18708%09red
Alcoholism	KEGG PATHWAY	mmu05034	1	199	0.966517	0.99598	ENSMUSG00000055254	mmu:18212|	18212|	http://www.genome.jp/kegg-bin/show_pathway?mmu05034/mmu:18212%09red
Herpes simplex infection	KEGG PATHWAY	mmu05168	1	205	0.969773	0.99598	ENSMUSG00000055866	mmu:18627|	18627|	http://www.genome.jp/kegg-bin/show_pathway?mmu05168/mmu:18627%09red
Rap1 signaling pathway	KEGG PATHWAY	mmu04015	1	214	0.974075	0.99598	ENSMUSG00000041417	mmu:18708|	18708|	http://www.genome.jp/kegg-bin/show_pathway?mmu04015/mmu:18708%09red
Regulation of actin cytoskeleton	KEGG PATHWAY	mmu04810	1	217	0.975369	0.99598	ENSMUSG00000041417	mmu:18708|	18708|	http://www.genome.jp/kegg-bin/show_pathway?mmu04810/mmu:18708%09red
Ras signaling pathway	KEGG PATHWAY	mmu04014	1	229	0.979931	0.99598	ENSMUSG00000041417	mmu:18708|	18708|	http://www.genome.jp/kegg-bin/show_pathway?mmu04014/mmu:18708%09red
Viral carcinogenesis	KEGG PATHWAY	mmu05203	1	229	0.979931	0.99598	ENSMUSG00000041417	mmu:18708|	18708|	http://www.genome.jp/kegg-bin/show_pathway?mmu05203/mmu:18708%09red
MicroRNAs in cancer	KEGG PATHWAY	mmu05206	1	270	0.990039	0.99598	ENSMUSG00000044005	mmu:216456|	216456|	http://www.genome.jp/kegg-bin/show_pathway?mmu05206/mmu:216456%09red
HTLV-I infection	KEGG PATHWAY	mmu05166	1	277	0.991163	0.99598	ENSMUSG00000041417	mmu:18708|	18708|	http://www.genome.jp/kegg-bin/show_pathway?mmu05166/mmu:18708%09red
Pathways in cancer	KEGG PATHWAY	mmu05200	1	323	0.99598	0.99598	ENSMUSG00000041417	mmu:18708|	18708|	http://www.genome.jp/kegg-bin/show_pathway?mmu05200/mmu:18708%09red
--------------------
#Term	Database	ID	Input number	Background number	P-Value	Corrected P-Value	Input	KEGG_ID/KO	Entrez_ID	Hyperlink
--------------------
#Term	Database	ID	Input number	Background number	P-Value	Corrected P-Value	Input	KEGG_ID/KO	Entrez_ID	Hyperlink
--------------------
