# Supplementary material for: Curcumin promotes AApoAII amyloidosis and peroxisome proliferation in mice by activating the PPARα signaling pathway
Source: eLife journal article supplement (doi:10.7554/elife.63538), 2021-01-26
Supplement: supp [file elife-63538-supp-v1.zip › elife_poa_e63538_Figure_3_source_data_5.xls]

## Sheet: Supplementary File 5. A-CurvsA-
##Databases: KEGG PATHWAY
##Statistical test method: hypergeometric test / Fisher's exact test
##FDR correction method: Benjamini and Hochberg
#Term	Database	ID	Input number	Background number	P-Value	Corrected P-Value	Input	KEGG_ID/KO	Entrez_ID	Hyperlink
PPAR signaling pathway	KEGG PATHWAY	mmu03320	19	82	7.46e-17	7.69e-15	ENSMUSG00000066072|ENSMUSG00000066071|ENSMUSG00000010651|ENSMUSG00000028715|ENSMUSG00000028712|ENSMUSG00000017754|ENSMUSG00000028240|ENSMUSG00000054422|ENSMUSG00000037071|ENSMUSG00000022853|ENSMUSG00000062908|ENSMUSG00000024981|ENSMUSG00000002944|ENSMUSG00000063929|ENSMUSG00000032418|ENSMUSG00000027533|ENSMUSG00000015568|ENSMUSG00000026385|ENSMUSG00000020777	mmu:13117|mmu:277753|mmu:235674|mmu:13119|mmu:13117|mmu:18830|mmu:13122|mmu:14080|mmu:20249|mmu:74147|mmu:11364|mmu:433256|mmu:12491|mmu:100040843|mmu:17436|mmu:16592|mmu:16956|mmu:13167|mmu:11430|	13117|277753|235674|13119|13117|18830|13122|14080|20249|74147|11364|433256|12491|100040843|17436|16592|16956|13167|11430|	http://www.genome.jp/kegg-bin/show_pathway?mmu03320/mmu:11430%09red/mmu:13117%09red/mmu:74147%09red/mmu:13119%09red/mmu:14080%09red/mmu:100040843%09red/mmu:16592%09red/mmu:18830%09red/mmu:11364%09red/mmu:16956%09red/mmu:12491%09red/mmu:277753%09red/mmu:235674%09red/mmu:13167%09red/mmu:20249%09red/mmu:433256%09red/mmu:13122%09red/mmu:17436%09red
Retinol metabolism	KEGG PATHWAY	mmu00830	19	88	2.32e-16	1.19e-14	ENSMUSG00000067225|ENSMUSG00000066072|ENSMUSG00000066071|ENSMUSG00000042248|ENSMUSG00000054827|ENSMUSG00000035836|ENSMUSG00000028712|ENSMUSG00000054417|ENSMUSG00000032310|ENSMUSG00000028715|ENSMUSG00000066441|ENSMUSG00000038656|ENSMUSG00000005547|ENSMUSG00000075551|ENSMUSG00000075552|ENSMUSG00000063929|ENSMUSG00000060613|ENSMUSG00000025004|ENSMUSG00000056666	mmu:404195|mmu:13117|mmu:277753|mmu:13096|mmu:107141|mmu:71773|mmu:13117|mmu:337924|mmu:13077|mmu:13119|mmu:17252|mmu:13114|mmu:13087|mmu:53973|mmu:53973|mmu:100040843|mmu:226105|mmu:13099|mmu:67442|	404195|13117|277753|13096|107141|71773|13117|337924|13077|13119|17252|13114|13087|53973|53973|100040843|226105|13099|67442|	http://www.genome.jp/kegg-bin/show_pathway?mmu00830/mmu:13119%09red/mmu:277753%09red/mmu:17252%09red/mmu:13117%09red/mmu:13114%09red/mmu:404195%09red/mmu:53973%09red/mmu:337924%09red/mmu:100040843%09red/mmu:71773%09red/mmu:107141%09red/mmu:226105%09red/mmu:13099%09red/mmu:13087%09red/mmu:13096%09red/mmu:13077%09red/mmu:67442%09red
Fatty acid degradation	KEGG PATHWAY	mmu00071	13	49	1.4e-12	4.8e-11	ENSMUSG00000066072|ENSMUSG00000066071|ENSMUSG00000010651|ENSMUSG00000028712|ENSMUSG00000028715|ENSMUSG00000022853|ENSMUSG00000062908|ENSMUSG00000024981|ENSMUSG00000020777|ENSMUSG00000063929|ENSMUSG00000023832|ENSMUSG00000021417|ENSMUSG00000024132	mmu:13117|mmu:277753|mmu:235674|mmu:13117|mmu:13119|mmu:74147|mmu:11364|mmu:433256|mmu:11430|mmu:100040843|mmu:110460|mmu:23986|mmu:13177|	13117|277753|235674|13117|13119|74147|11364|433256|11430|100040843|110460|23986|13177|	http://www.genome.jp/kegg-bin/show_pathway?mmu00071/mmu:11430%09red/mmu:13117%09red/mmu:23986%09red/mmu:74147%09red/mmu:13119%09red/mmu:100040843%09red/mmu:13177%09red/mmu:277753%09red/mmu:235674%09red/mmu:110460%09red/mmu:433256%09red/mmu:11364%09red
Chemical carcinogenesis	KEGG PATHWAY	mmu05204	13	92	1.41e-09	3.63e-08	ENSMUSG00000033318|ENSMUSG00000067225|ENSMUSG00000075552|ENSMUSG00000054827|ENSMUSG00000035836|ENSMUSG00000038656|ENSMUSG00000075551|ENSMUSG00000042248|ENSMUSG00000054417|ENSMUSG00000078798|ENSMUSG00000060613|ENSMUSG00000032310|ENSMUSG00000025004	mmu:14872|mmu:404195|mmu:53973|mmu:107141|mmu:71773|mmu:13114|mmu:53973|mmu:13096|mmu:337924|mmu:20859|mmu:226105|mmu:13077|mmu:13099|	14872|404195|53973|107141|71773|13114|53973|13096|337924|20859|226105|13077|13099|	http://www.genome.jp/kegg-bin/show_pathway?mmu05204/mmu:226105%09red/mmu:13114%09red/mmu:14872%09red/mmu:53973%09red/mmu:337924%09red/mmu:107141%09red/mmu:20859%09red/mmu:13099%09red/mmu:13096%09red/mmu:13077%09red/mmu:71773%09red/mmu:404195%09red
Metabolic pathways	KEGG PATHWAY	mmu01100	45	1256	3.87e-09	7.97e-08	ENSMUSG00000001467|ENSMUSG00000024292|ENSMUSG00000027952|ENSMUSG00000093930|ENSMUSG00000021226|ENSMUSG00000028240|ENSMUSG00000028715|ENSMUSG00000063929|ENSMUSG00000020777|ENSMUSG00000058454|ENSMUSG00000029597|ENSMUSG00000020917|ENSMUSG00000035836|ENSMUSG00000028712|ENSMUSG00000022853|ENSMUSG00000066441|ENSMUSG00000027605|ENSMUSG00000072949|ENSMUSG00000024981|ENSMUSG00000075551|ENSMUSG00000075552|…	mmu:13121|mmu:64385|mmu:68603|mmu:208715|mmu:171210|mmu:13122|mmu:13119|mmu:100040843|mmu:11430|mmu:13360|mmu:231691|mmu:104112|mmu:71773|mmu:13117|mmu:74147|mmu:17252|mmu:60525|mmu:26897|mmu:433256|mmu:53973|mmu:53973|mmu:226105|mmu:19125|mmu:13077|mmu:404195|mmu:13117|mmu:277753|mmu:107141|mmu:319554|mmu:13087|mmu:212862|mmu:13096|mmu:16987|mmu:110460|mmu:13099|mmu:235674|mmu:13884|mmu:100705|m…	13121|64385|68603|208715|171210|13122|13119|100040843|11430|13360|231691|104112|71773|13117|74147|17252|60525|26897|433256|53973|53973|226105|19125|13077|404195|13117|277753|107141|319554|13087|212862|13096|16987|110460|13099|235674|13884|100705|56185|18194|268756|13114|11364|337924|17436|	http://www.genome.jp/kegg-bin/show_pathway?mmu01100/mmu:107141%09red/mmu:64385%09red/mmu:13117%09red/mmu:13114%09red/mmu:171210%09red/mmu:404195%09red/mmu:17252%09red/mmu:13884%09red/mmu:208715%09red/mmu:13099%09red/mmu:235674%09red/mmu:13096%09red/mmu:319554%09red/mmu:11364%09red/mmu:277753%09red/mmu:212862%09red/mmu:16987%09red/mmu:19125%09red/mmu:104112%09red/mmu:53973%09red/mmu:11430%09red/mm…
Linoleic acid metabolism	KEGG PATHWAY	mmu00591	10	50	6.03e-09	1.02e-07	ENSMUSG00000067225|ENSMUSG00000075552|ENSMUSG00000054827|ENSMUSG00000038656|ENSMUSG00000075551|ENSMUSG00000042248|ENSMUSG00000054417|ENSMUSG00000060613|ENSMUSG00000032310|ENSMUSG00000025004	mmu:404195|mmu:53973|mmu:107141|mmu:13114|mmu:53973|mmu:13096|mmu:337924|mmu:226105|mmu:13077|mmu:13099|	404195|53973|107141|13114|53973|13096|337924|226105|13077|13099|	http://www.genome.jp/kegg-bin/show_pathway?mmu00591/mmu:53973%09red/mmu:13114%09red/mmu:404195%09red/mmu:226105%09red/mmu:337924%09red/mmu:107141%09red/mmu:13099%09red/mmu:13096%09red/mmu:13077%09red
Steroid hormone biosynthesis	KEGG PATHWAY	mmu00140	12	86	6.93e-09	1.02e-07	ENSMUSG00000067225|ENSMUSG00000075552|ENSMUSG00000054827|ENSMUSG00000035836|ENSMUSG00000028240|ENSMUSG00000038656|ENSMUSG00000075551|ENSMUSG00000042248|ENSMUSG00000054417|ENSMUSG00000060613|ENSMUSG00000032310|ENSMUSG00000025004	mmu:404195|mmu:53973|mmu:107141|mmu:71773|mmu:13122|mmu:13114|mmu:53973|mmu:13096|mmu:337924|mmu:226105|mmu:13077|mmu:13099|	404195|53973|107141|71773|13122|13114|53973|13096|337924|226105|13077|13099|	http://www.genome.jp/kegg-bin/show_pathway?mmu00140/mmu:53973%09red/mmu:13122%09red/mmu:13114%09red/mmu:404195%09red/mmu:226105%09red/mmu:337924%09red/mmu:107141%09red/mmu:13099%09red/mmu:13096%09red/mmu:13077%09red/mmu:71773%09red
Arachidonic acid metabolism	KEGG PATHWAY	mmu00590	11	90	1.02e-07	1.31e-06	ENSMUSG00000067225|ENSMUSG00000066072|ENSMUSG00000066071|ENSMUSG00000054827|ENSMUSG00000024292|ENSMUSG00000028712|ENSMUSG00000028715|ENSMUSG00000042248|ENSMUSG00000063929|ENSMUSG00000060613|ENSMUSG00000025004	mmu:404195|mmu:13117|mmu:277753|mmu:107141|mmu:64385|mmu:13117|mmu:13119|mmu:13096|mmu:100040843|mmu:226105|mmu:13099|	404195|13117|277753|107141|64385|13117|13119|13096|100040843|226105|13099|	http://www.genome.jp/kegg-bin/show_pathway?mmu00590/mmu:277753%09red/mmu:13119%09red/mmu:64385%09red/mmu:13117%09red/mmu:404195%09red/mmu:226105%09red/mmu:100040843%09red/mmu:107141%09red/mmu:13099%09red/mmu:13096%09red
Peroxisome	KEGG PATHWAY	mmu04146	10	81	3.58e-07	4.09e-06	ENSMUSG00000010651|ENSMUSG00000053898|ENSMUSG00000027870|ENSMUSG00000027952|ENSMUSG00000026853|ENSMUSG00000022853|ENSMUSG00000024981|ENSMUSG00000020777|ENSMUSG00000021417|ENSMUSG00000030545	mmu:235674|mmu:51798|mmu:56185|mmu:68603|mmu:12908|mmu:74147|mmu:433256|mmu:11430|mmu:23986|mmu:18631|	235674|51798|56185|68603|12908|74147|433256|11430|23986|18631|	http://www.genome.jp/kegg-bin/show_pathway?mmu04146/mmu:18631%09red/mmu:56185%09red/mmu:12908%09red/mmu:23986%09red/mmu:74147%09red/mmu:11430%09red/mmu:68603%09red/mmu:235674%09red/mmu:51798%09red/mmu:433256%09red
Fatty acid metabolism	KEGG PATHWAY	mmu01212	8	50	9.31e-07	9.58e-06	ENSMUSG00000010651|ENSMUSG00000042010|ENSMUSG00000037071|ENSMUSG00000022853|ENSMUSG00000062908|ENSMUSG00000024981|ENSMUSG00000020777|ENSMUSG00000023832	mmu:235674|mmu:100705|mmu:20249|mmu:74147|mmu:11364|mmu:433256|mmu:11430|mmu:110460|	235674|100705|20249|74147|11364|433256|11430|110460|	http://www.genome.jp/kegg-bin/show_pathway?mmu01212/mmu:100705%09red/mmu:74147%09red/mmu:11430%09red/mmu:20249%09red/mmu:235674%09red/mmu:110460%09red/mmu:433256%09red/mmu:11364%09red
Inflammatory mediator regulation of TRP channels	KEGG PATHWAY	mmu04750	11	126	2.22e-06	2.08e-05	ENSMUSG00000067225|ENSMUSG00000066072|ENSMUSG00000066071|ENSMUSG00000057897|ENSMUSG00000054827|ENSMUSG00000028712|ENSMUSG00000028715|ENSMUSG00000042248|ENSMUSG00000063929|ENSMUSG00000060613|ENSMUSG00000025004	mmu:404195|mmu:13117|mmu:277753|mmu:12323|mmu:107141|mmu:13117|mmu:13119|mmu:13096|mmu:100040843|mmu:226105|mmu:13099|	404195|13117|277753|12323|107141|13117|13119|13096|100040843|226105|13099|	http://www.genome.jp/kegg-bin/show_pathway?mmu04750/mmu:277753%09red/mmu:226105%09red/mmu:13117%09red/mmu:404195%09red/mmu:13119%09red/mmu:12323%09red/mmu:100040843%09red/mmu:107141%09red/mmu:13099%09red/mmu:13096%09red
Biosynthesis of unsaturated fatty acids	KEGG PATHWAY	mmu01040	5	25	4.27e-05	0.000366607	ENSMUSG00000037071|ENSMUSG00000021226|ENSMUSG00000010651|ENSMUSG00000072949|ENSMUSG00000020777	mmu:20249|mmu:171210|mmu:235674|mmu:26897|mmu:11430|	20249|171210|235674|26897|11430|	http://www.genome.jp/kegg-bin/show_pathway?mmu01040/mmu:235674%09red/mmu:11430%09red/mmu:26897%09red/mmu:20249%09red/mmu:171210%09red
Propanoate metabolism	KEGG PATHWAY	mmu00640	5	27	5.91e-05	0.000467947	ENSMUSG00000022853|ENSMUSG00000062908|ENSMUSG00000023832|ENSMUSG00000027605|ENSMUSG00000042010	mmu:74147|mmu:11364|mmu:110460|mmu:60525|mmu:100705|	74147|11364|110460|60525|100705|	http://www.genome.jp/kegg-bin/show_pathway?mmu00640/mmu:60525%09red/mmu:74147%09red/mmu:100705%09red/mmu:11364%09red/mmu:110460%09red
Steroid biosynthesis	KEGG PATHWAY	mmu00100	4	19	0.000218397	0.00160678	ENSMUSG00000033105|ENSMUSG00000058454|ENSMUSG00000001467|ENSMUSG00000031349	mmu:16987|mmu:13360|mmu:13121|mmu:18194|	16987|13360|13121|18194|	http://www.genome.jp/kegg-bin/show_pathway?mmu00100/mmu:13360%09red/mmu:18194%09red/mmu:16987%09red/mmu:13121%09red
Terpenoid backbone biosynthesis	KEGG PATHWAY	mmu00900	4	21	0.000305556	0.00209815	ENSMUSG00000027952|ENSMUSG00000093930|ENSMUSG00000023832|ENSMUSG00000058258	mmu:68603|mmu:208715|mmu:110460|mmu:319554|	68603|208715|110460|319554|	http://www.genome.jp/kegg-bin/show_pathway?mmu00900/mmu:110460%09red/mmu:68603%09red/mmu:319554%09red/mmu:208715%09red
Valine, leucine and isoleucine degradation	KEGG PATHWAY	mmu00280	5	52	0.000937568	0.00603559	ENSMUSG00000093930|ENSMUSG00000062908|ENSMUSG00000023832|ENSMUSG00000022853|ENSMUSG00000010651	mmu:208715|mmu:11364|mmu:110460|mmu:74147|mmu:235674|	208715|11364|110460|74147|235674|	http://www.genome.jp/kegg-bin/show_pathway?mmu00280/mmu:235674%09red/mmu:74147%09red/mmu:11364%09red/mmu:208715%09red/mmu:110460%09red
Pyruvate metabolism	KEGG PATHWAY	mmu00620	4	39	0.00247282	0.0143561	ENSMUSG00000032418|ENSMUSG00000027605|ENSMUSG00000023832|ENSMUSG00000042010	mmu:17436|mmu:60525|mmu:110460|mmu:100705|	17436|60525|110460|100705|	http://www.genome.jp/kegg-bin/show_pathway?mmu00620/mmu:60525%09red/mmu:110460%09red/mmu:100705%09red/mmu:17436%09red
Drug metabolism - cytochrome P450	KEGG PATHWAY	mmu00982	5	66	0.00250884	0.0143561	ENSMUSG00000033318|ENSMUSG00000035836|ENSMUSG00000026691|ENSMUSG00000040170|ENSMUSG00000032310	mmu:14872|mmu:71773|mmu:14262|mmu:55990|mmu:13077|	14872|71773|14262|55990|13077|	http://www.genome.jp/kegg-bin/show_pathway?mmu00982/mmu:13077%09red/mmu:14872%09red/mmu:55990%09red/mmu:71773%09red/mmu:14262%09red
Fat digestion and absorption	KEGG PATHWAY	mmu04975	4	40	0.00269213	0.0145942	ENSMUSG00000023832|ENSMUSG00000032080|ENSMUSG00000002944|ENSMUSG00000054422	mmu:110460|mmu:11808|mmu:12491|mmu:14080|	110460|11808|12491|14080|	http://www.genome.jp/kegg-bin/show_pathway?mmu04975/mmu:110460%09red/mmu:11808%09red/mmu:12491%09red/mmu:14080%09red
Carbon metabolism	KEGG PATHWAY	mmu01200	6	111	0.00469663	0.0241877	ENSMUSG00000027605|ENSMUSG00000022853|ENSMUSG00000062908|ENSMUSG00000032418|ENSMUSG00000023832|ENSMUSG00000029597	mmu:60525|mmu:74147|mmu:11364|mmu:17436|mmu:110460|mmu:231691|	60525|74147|11364|17436|110460|231691|	http://www.genome.jp/kegg-bin/show_pathway?mmu01200/mmu:60525%09red/mmu:74147%09red/mmu:231691%09red/mmu:110460%09red/mmu:17436%09red/mmu:11364%09red
Butanoate metabolism	KEGG PATHWAY	mmu00650	3	26	0.00649944	0.0318782	ENSMUSG00000093930|ENSMUSG00000023832|ENSMUSG00000022853	mmu:208715|mmu:110460|mmu:74147|	208715|110460|74147|	http://www.genome.jp/kegg-bin/show_pathway?mmu00650/mmu:74147%09red/mmu:208715%09red/mmu:110460%09red
Synthesis and degradation of ketone bodies	KEGG PATHWAY	mmu00072	2	10	0.0105513	0.0493995	ENSMUSG00000093930|ENSMUSG00000023832	mmu:208715|mmu:110460|	208715|110460|	http://www.genome.jp/kegg-bin/show_pathway?mmu00072/mmu:110460%09red/mmu:208715%09red
Metabolism of xenobiotics by cytochrome P450	KEGG PATHWAY	mmu00980	4	64	0.0126202	0.0565167	ENSMUSG00000033318|ENSMUSG00000078798|ENSMUSG00000032310|ENSMUSG00000035836	mmu:14872|mmu:20859|mmu:13077|mmu:71773|	14872|20859|13077|71773|	http://www.genome.jp/kegg-bin/show_pathway?mmu00980/mmu:13077%09red/mmu:14872%09red/mmu:20859%09red/mmu:71773%09red
Bile secretion	KEGG PATHWAY	mmu04976	4	72	0.0183243	0.0763372	ENSMUSG00000078798|ENSMUSG00000067144|ENSMUSG00000029802|ENSMUSG00000028240	mmu:20859|mmu:108114|mmu:26357|mmu:13122|	20859|108114|26357|13122|	http://www.genome.jp/kegg-bin/show_pathway?mmu04976/mmu:108114%09red/mmu:26357%09red/mmu:20859%09red/mmu:13122%09red
Fatty acid biosynthesis	KEGG PATHWAY	mmu00061	2	14	0.0185284	0.0763372	ENSMUSG00000024981|ENSMUSG00000042010	mmu:433256|mmu:100705|	433256|100705|	http://www.genome.jp/kegg-bin/show_pathway?mmu00061/mmu:100705%09red/mmu:433256%09red
Primary bile acid biosynthesis	KEGG PATHWAY	mmu00120	2	16	0.0232178	0.0919783	ENSMUSG00000023963|ENSMUSG00000028240	mmu:56050|mmu:13122|	56050|13122|	http://www.genome.jp/kegg-bin/show_pathway?mmu00120/mmu:56050%09red/mmu:13122%09red
Tryptophan metabolism	KEGG PATHWAY	mmu00380	3	46	0.0270187	0.103071	ENSMUSG00000022853|ENSMUSG00000023832|ENSMUSG00000032310	mmu:74147|mmu:110460|mmu:13077|	74147|110460|13077|	http://www.genome.jp/kegg-bin/show_pathway?mmu00380/mmu:74147%09red/mmu:13077%09red/mmu:110460%09red
Vascular smooth muscle contraction	KEGG PATHWAY	mmu04270	5	128	0.0321321	0.1182	ENSMUSG00000066071|ENSMUSG00000066072|ENSMUSG00000028712|ENSMUSG00000028715|ENSMUSG00000063929	mmu:277753|mmu:13117|mmu:13117|mmu:13119|mmu:100040843|	277753|13117|13117|13119|100040843|	http://www.genome.jp/kegg-bin/show_pathway?mmu04270/mmu:277753%09red/mmu:13119%09red/mmu:13117%09red/mmu:100040843%09red
Serotonergic synapse	KEGG PATHWAY	mmu04726	5	133	0.0367789	0.130628	ENSMUSG00000067225|ENSMUSG00000060613|ENSMUSG00000042248|ENSMUSG00000054827|ENSMUSG00000025004	mmu:404195|mmu:226105|mmu:13096|mmu:107141|mmu:13099|	404195|226105|13096|107141|13099|	http://www.genome.jp/kegg-bin/show_pathway?mmu04726/mmu:13096%09red/mmu:404195%09red/mmu:107141%09red/mmu:226105%09red/mmu:13099%09red
Fatty acid elongation	KEGG PATHWAY	mmu00062	2	24	0.0460334	0.158048	ENSMUSG00000021226|ENSMUSG00000072949	mmu:171210|mmu:26897|	171210|26897|	http://www.genome.jp/kegg-bin/show_pathway?mmu00062/mmu:171210%09red/mmu:26897%09red
alpha-Linolenic acid metabolism	KEGG PATHWAY	mmu00592	2	25	0.0492917	0.163776	ENSMUSG00000010651|ENSMUSG00000020777	mmu:235674|mmu:11430|	235674|11430|	http://www.genome.jp/kegg-bin/show_pathway?mmu00592/mmu:235674%09red/mmu:11430%09red
Glyoxylate and dicarboxylate metabolism	KEGG PATHWAY	mmu00630	2	26	0.0526307	0.169405	ENSMUSG00000027870|ENSMUSG00000023832	mmu:56185|mmu:110460|	56185|110460|	http://www.genome.jp/kegg-bin/show_pathway?mmu00630/mmu:110460%09red/mmu:56185%09red
Ascorbate and aldarate metabolism	KEGG PATHWAY	mmu00053	2	27	0.0560479	0.174937	ENSMUSG00000035836|ENSMUSG00000034450	mmu:71773|mmu:268756|	71773|268756|	http://www.genome.jp/kegg-bin/show_pathway?mmu00053/mmu:268756%09red/mmu:71773%09red
beta-Alanine metabolism	KEGG PATHWAY	mmu00410	2	32	0.0742144	0.224826	ENSMUSG00000022853|ENSMUSG00000062908	mmu:74147|mmu:11364|	74147|11364|	http://www.genome.jp/kegg-bin/show_pathway?mmu00410/mmu:74147%09red/mmu:11364%09red
Adipocytokine signaling pathway	KEGG PATHWAY	mmu04920	3	72	0.0773719	0.227694	ENSMUSG00000024981|ENSMUSG00000002944|ENSMUSG00000042010	mmu:433256|mmu:12491|mmu:100705|	433256|12491|100705|	http://www.genome.jp/kegg-bin/show_pathway?mmu04920/mmu:100705%09red/mmu:433256%09red/mmu:12491%09red
Caffeine metabolism	KEGG PATHWAY	mmu00232	1	6	0.0890233	0.254706	ENSMUSG00000032310	mmu:13077|	13077|	http://www.genome.jp/kegg-bin/show_pathway?mmu00232/mmu:13077%09red
Lysine degradation	KEGG PATHWAY	mmu00310	2	51	0.155399	0.432597	ENSMUSG00000022853|ENSMUSG00000023832	mmu:74147|mmu:110460|	74147|110460|	http://www.genome.jp/kegg-bin/show_pathway?mmu00310/mmu:74147%09red/mmu:110460%09red
Drug metabolism - other enzymes	KEGG PATHWAY	mmu00983	2	52	0.160042	0.433799	ENSMUSG00000035836|ENSMUSG00000057400	mmu:71773|mmu:13884|	71773|13884|	http://www.genome.jp/kegg-bin/show_pathway?mmu00983/mmu:13884%09red/mmu:71773%09red
Pantothenate and CoA biosynthesis	KEGG PATHWAY	mmu00770	1	17	0.213221	0.563121	ENSMUSG00000037440	mmu:22361|	22361|	http://www.genome.jp/kegg-bin/show_pathway?mmu00770/mmu:22361%09red
AMPK signaling pathway	KEGG PATHWAY	mmu04152	3	129	0.254412	0.655112	ENSMUSG00000037071|ENSMUSG00000002944|ENSMUSG00000042010	mmu:20249|mmu:12491|mmu:100705|	20249|12491|100705|	http://www.genome.jp/kegg-bin/show_pathway?mmu04152/mmu:100705%09red/mmu:12491%09red/mmu:20249%09red
Vitamin digestion and absorption	KEGG PATHWAY	mmu04977	1	24	0.28331	0.711731	ENSMUSG00000032080	mmu:11808|	11808|	http://www.genome.jp/kegg-bin/show_pathway?mmu04977/mmu:11808%09red
Glycosylphosphatidylinositol(GPI)-anchor biosynthesis	KEGG PATHWAY	mmu00563	1	25	0.292801	0.71806	ENSMUSG00000021340	mmu:14756|	14756|	http://www.genome.jp/kegg-bin/show_pathway?mmu00563/mmu:14756%09red
Insulin signaling pathway	KEGG PATHWAY	mmu04910	3	142	0.301002	0.721005	ENSMUSG00000046794|ENSMUSG00000020027|ENSMUSG00000042010	mmu:244416|mmu:216233|mmu:100705|	244416|216233|100705|	http://www.genome.jp/kegg-bin/show_pathway?mmu04910/mmu:216233%09red/mmu:100705%09red/mmu:244416%09red
Citrate cycle (TCA cycle)	KEGG PATHWAY	mmu00020	1	32	0.355821	0.832944	ENSMUSG00000020917	mmu:104112|	104112|	http://www.genome.jp/kegg-bin/show_pathway?mmu00020/mmu:104112%09red
Pentose and glucuronate interconversions	KEGG PATHWAY	mmu00040	1	36	0.389285	0.884991	ENSMUSG00000035836	mmu:71773|	71773|	http://www.genome.jp/kegg-bin/show_pathway?mmu00040/mmu:71773%09red
Porphyrin and chlorophyll metabolism	KEGG PATHWAY	mmu00860	1	40	0.421015	0.884991	ENSMUSG00000035836	mmu:71773|	71773|	http://www.genome.jp/kegg-bin/show_pathway?mmu00860/mmu:71773%09red
Glycine, serine and threonine metabolism	KEGG PATHWAY	mmu00260	1	40	0.421015	0.884991	ENSMUSG00000029597	mmu:231691|	231691|	http://www.genome.jp/kegg-bin/show_pathway?mmu00260/mmu:231691%09red
Nicotine addiction	KEGG PATHWAY	mmu05033	1	40	0.421015	0.884991	ENSMUSG00000027577	mmu:11438|	11438|	http://www.genome.jp/kegg-bin/show_pathway?mmu05033/mmu:11438%09red
Cysteine and methionine metabolism	KEGG PATHWAY	mmu00270	1	40	0.421015	0.884991	ENSMUSG00000029597	mmu:231691|	231691|	http://www.genome.jp/kegg-bin/show_pathway?mmu00270/mmu:231691%09red
Ether lipid metabolism	KEGG PATHWAY	mmu00565	1	42	0.436258	0.898692	ENSMUSG00000060002	mmu:212862|	212862|	http://www.genome.jp/kegg-bin/show_pathway?mmu00565/mmu:212862%09red
Cholinergic synapse	KEGG PATHWAY	mmu04725	2	113	0.450863	0.910566	ENSMUSG00000027577|ENSMUSG00000057897	mmu:11438|mmu:12323|	11438|12323|	http://www.genome.jp/kegg-bin/show_pathway?mmu04725/mmu:11438%09red/mmu:12323%09red
ABC transporters	KEGG PATHWAY	mmu02010	1	46	0.465555	0.918342	ENSMUSG00000029802	mmu:26357|	26357|	http://www.genome.jp/kegg-bin/show_pathway?mmu02010/mmu:26357%09red
Malaria	KEGG PATHWAY	mmu05144	1	48	0.479629	0.918342	ENSMUSG00000002944	mmu:12491|	12491|	http://www.genome.jp/kegg-bin/show_pathway?mmu05144/mmu:12491%09red
Type II diabetes mellitus	KEGG PATHWAY	mmu04930	1	50	0.493333	0.918342	ENSMUSG00000020027	mmu:216233|	216233|	http://www.genome.jp/kegg-bin/show_pathway?mmu04930/mmu:216233%09red
Neurotrophin signaling pathway	KEGG PATHWAY	mmu04722	2	123	0.494132	0.918342	ENSMUSG00000055254|ENSMUSG00000057897	mmu:18212|mmu:12323|	18212|12323|	http://www.genome.jp/kegg-bin/show_pathway?mmu04722/mmu:12323%09red/mmu:18212%09red
Amyotrophic lateral sclerosis (ALS)	KEGG PATHWAY	mmu05014	1	52	0.506678	0.918342	ENSMUSG00000005089	mmu:20511|	20511|	http://www.genome.jp/kegg-bin/show_pathway?mmu05014/mmu:20511%09red
Glutathione metabolism	KEGG PATHWAY	mmu00480	1	53	0.513218	0.918342	ENSMUSG00000033318	mmu:14872|	14872|	http://www.genome.jp/kegg-bin/show_pathway?mmu00480/mmu:14872%09red
Starch and sucrose metabolism	KEGG PATHWAY	mmu00500	1	54	0.519672	0.918342	ENSMUSG00000035836	mmu:71773|	71773|	http://www.genome.jp/kegg-bin/show_pathway?mmu00500/mmu:71773%09red
Glycerolipid metabolism	KEGG PATHWAY	mmu00561	1	55	0.52604	0.918342	ENSMUSG00000015568	mmu:16956|	16956|	http://www.genome.jp/kegg-bin/show_pathway?mmu00561/mmu:16956%09red
Ovarian steroidogenesis	KEGG PATHWAY	mmu04913	1	58	0.544645	0.929843	ENSMUSG00000021226	mmu:171210|	171210|	http://www.genome.jp/kegg-bin/show_pathway?mmu04913/mmu:171210%09red
Arginine and proline metabolism	KEGG PATHWAY	mmu00330	1	59	0.550684	0.929843	ENSMUSG00000003526	mmu:19125|	19125|	http://www.genome.jp/kegg-bin/show_pathway?mmu00330/mmu:19125%09red
Glycolysis / Gluconeogenesis	KEGG PATHWAY	mmu00010	1	65	0.585274	0.944753	ENSMUSG00000027605	mmu:60525|	60525|	http://www.genome.jp/kegg-bin/show_pathway?mmu00010/mmu:60525%09red
Glioma	KEGG PATHWAY	mmu05214	1	65	0.585274	0.944753	ENSMUSG00000057897	mmu:12323|	12323|	http://www.genome.jp/kegg-bin/show_pathway?mmu05214/mmu:12323%09red
Long-term potentiation	KEGG PATHWAY	mmu04720	1	66	0.590775	0.944753	ENSMUSG00000057897	mmu:12323|	12323|	http://www.genome.jp/kegg-bin/show_pathway?mmu04720/mmu:12323%09red
Amphetamine addiction	KEGG PATHWAY	mmu05031	1	67	0.596203	0.944753	ENSMUSG00000057897	mmu:12323|	12323|	http://www.genome.jp/kegg-bin/show_pathway?mmu05031/mmu:12323%09red
Jak-STAT signaling pathway	KEGG PATHWAY	mmu04630	2	155	0.617191	0.957663	ENSMUSG00000020027|ENSMUSG00000054263	mmu:216233|mmu:16880|	216233|16880|	http://www.genome.jp/kegg-bin/show_pathway?mmu04630/mmu:216233%09red/mmu:16880%09red
Prolactin signaling pathway	KEGG PATHWAY	mmu04917	1	74	0.632244	0.957663	ENSMUSG00000020027	mmu:216233|	216233|	http://www.genome.jp/kegg-bin/show_pathway?mmu04917/mmu:216233%09red
Gastric acid secretion	KEGG PATHWAY	mmu04971	1	74	0.632244	0.957663	ENSMUSG00000057897	mmu:12323|	12323|	http://www.genome.jp/kegg-bin/show_pathway?mmu04971/mmu:12323%09red
Complement and coagulation cascades	KEGG PATHWAY	mmu04610	1	77	0.64669	0.958136	ENSMUSG00000079015	mmu:20702|	20702|	http://www.genome.jp/kegg-bin/show_pathway?mmu04610/mmu:20702%09red
Biosynthesis of amino acids	KEGG PATHWAY	mmu01230	1	78	0.651379	0.958136	ENSMUSG00000029597	mmu:231691|	231691|	http://www.genome.jp/kegg-bin/show_pathway?mmu01230/mmu:231691%09red
Hematopoietic cell lineage	KEGG PATHWAY	mmu04640	1	86	0.686723	0.958136	ENSMUSG00000002944	mmu:12491|	12491|	http://www.genome.jp/kegg-bin/show_pathway?mmu04640/mmu:12491%09red
Insulin secretion	KEGG PATHWAY	mmu04911	1	86	0.686723	0.958136	ENSMUSG00000057897	mmu:12323|	12323|	http://www.genome.jp/kegg-bin/show_pathway?mmu04911/mmu:12323%09red
ErbB signaling pathway	KEGG PATHWAY	mmu04012	1	87	0.690882	0.958136	ENSMUSG00000057897	mmu:12323|	12323|	http://www.genome.jp/kegg-bin/show_pathway?mmu04012/mmu:12323%09red
ECM-receptor interaction	KEGG PATHWAY	mmu04512	1	88	0.694986	0.958136	ENSMUSG00000002944	mmu:12491|	12491|	http://www.genome.jp/kegg-bin/show_pathway?mmu04512/mmu:12491%09red
GnRH signaling pathway	KEGG PATHWAY	mmu04912	1	89	0.699035	0.958136	ENSMUSG00000057897	mmu:12323|	12323|	http://www.genome.jp/kegg-bin/show_pathway?mmu04912/mmu:12323%09red
Glycerophospholipid metabolism	KEGG PATHWAY	mmu00564	1	91	0.706974	0.958136	ENSMUSG00000060002	mmu:212862|	212862|	http://www.genome.jp/kegg-bin/show_pathway?mmu00564/mmu:212862%09red
Circadian entrainment	KEGG PATHWAY	mmu04713	1	98	0.733152	0.970865	ENSMUSG00000057897	mmu:12323|	12323|	http://www.genome.jp/kegg-bin/show_pathway?mmu04713/mmu:12323%09red
Melanogenesis	KEGG PATHWAY	mmu04916	1	100	0.740194	0.970865	ENSMUSG00000057897	mmu:12323|	12323|	http://www.genome.jp/kegg-bin/show_pathway?mmu04916/mmu:12323%09red
cAMP signaling pathway	KEGG PATHWAY	mmu04024	2	198	0.744644	0.970865	ENSMUSG00000020777|ENSMUSG00000057897	mmu:11430|mmu:12323|	11430|12323|	http://www.genome.jp/kegg-bin/show_pathway?mmu04024/mmu:11430%09red/mmu:12323%09red
HIF-1 signaling pathway	KEGG PATHWAY	mmu04066	1	111	0.775738	0.977213	ENSMUSG00000057897	mmu:12323|	12323|	http://www.genome.jp/kegg-bin/show_pathway?mmu04066/mmu:12323%09red
Oocyte meiosis	KEGG PATHWAY	mmu04114	1	111	0.775738	0.977213	ENSMUSG00000057897	mmu:12323|	12323|	http://www.genome.jp/kegg-bin/show_pathway?mmu04114/mmu:12323%09red
Glutamatergic synapse	KEGG PATHWAY	mmu04724	1	114	0.78456	0.977213	ENSMUSG00000005089	mmu:20511|	20511|	http://www.genome.jp/kegg-bin/show_pathway?mmu04724/mmu:20511%09red
Thyroid hormone signaling pathway	KEGG PATHWAY	mmu04919	1	118	0.795788	0.977213	ENSMUSG00000034785	mmu:13370|	13370|	http://www.genome.jp/kegg-bin/show_pathway?mmu04919/mmu:13370%09red
Natural killer cell mediated cytotoxicity	KEGG PATHWAY	mmu04650	1	119	0.798502	0.977213	ENSMUSG00000053219	mmu:379043|	379043|	http://www.genome.jp/kegg-bin/show_pathway?mmu04650/mmu:379043%09red
Lysosome	KEGG PATHWAY	mmu04142	1	123	0.809005	0.977213	ENSMUSG00000004552	mmu:13034|	13034|	http://www.genome.jp/kegg-bin/show_pathway?mmu04142/mmu:13034%09red
Axon guidance	KEGG PATHWAY	mmu04360	1	129	0.823745	0.977213	ENSMUSG00000059810	mmu:50780|	50780|	http://www.genome.jp/kegg-bin/show_pathway?mmu04360/mmu:50780%09red
Dopaminergic synapse	KEGG PATHWAY	mmu04728	1	133	0.832936	0.977213	ENSMUSG00000057897	mmu:12323|	12323|	http://www.genome.jp/kegg-bin/show_pathway?mmu04728/mmu:12323%09red
FoxO signaling pathway	KEGG PATHWAY	mmu04068	1	135	0.83735	0.977213	ENSMUSG00000017868	mmu:27219|	27219|	http://www.genome.jp/kegg-bin/show_pathway?mmu04068/mmu:27219%09red
Signaling pathways regulating pluripotency of stem cells	KEGG PATHWAY	mmu04550	1	140	0.847884	0.977213	ENSMUSG00000054263	mmu:16880|	16880|	http://www.genome.jp/kegg-bin/show_pathway?mmu04550/mmu:16880%09red
Wnt signaling pathway	KEGG PATHWAY	mmu04310	1	143	0.853876	0.977213	ENSMUSG00000057897	mmu:12323|	12323|	http://www.genome.jp/kegg-bin/show_pathway?mmu04310/mmu:12323%09red
Adrenergic signaling in cardiomyocytes	KEGG PATHWAY	mmu04261	1	151	0.868726	0.978714	ENSMUSG00000057897	mmu:12323|	12323|	http://www.genome.jp/kegg-bin/show_pathway?mmu04261/mmu:12323%09red
Oxytocin signaling pathway	KEGG PATHWAY	mmu04921	1	158	0.880481	0.978714	ENSMUSG00000057897	mmu:12323|	12323|	http://www.genome.jp/kegg-bin/show_pathway?mmu04921/mmu:12323%09red
Alzheimer's disease	KEGG PATHWAY	mmu05010	1	173	0.902254	0.978714	ENSMUSG00000015568	mmu:16956|	16956|	http://www.genome.jp/kegg-bin/show_pathway?mmu05010/mmu:16956%09red
Phagosome	KEGG PATHWAY	mmu04145	1	174	0.903556	0.978714	ENSMUSG00000002944	mmu:12491|	12491|	http://www.genome.jp/kegg-bin/show_pathway?mmu04145/mmu:12491%09red
Tuberculosis	KEGG PATHWAY	mmu05152	1	176	0.906109	0.978714	ENSMUSG00000057897	mmu:12323|	12323|	http://www.genome.jp/kegg-bin/show_pathway?mmu05152/mmu:12323%09red
Calcium signaling pathway	KEGG PATHWAY	mmu04020	1	181	0.912199	0.978714	ENSMUSG00000057897	mmu:12323|	12323|	http://www.genome.jp/kegg-bin/show_pathway?mmu04020/mmu:12323%09red
Alcoholism	KEGG PATHWAY	mmu05034	1	199	0.931041	0.984153	ENSMUSG00000055254	mmu:18212|	18212|	http://www.genome.jp/kegg-bin/show_pathway?mmu05034/mmu:18212%09red
Proteoglycans in cancer	KEGG PATHWAY	mmu05205	1	205	0.936379	0.984153	ENSMUSG00000057897	mmu:12323|	12323|	http://www.genome.jp/kegg-bin/show_pathway?mmu05205/mmu:12323%09red
MAPK signaling pathway	KEGG PATHWAY	mmu04010	1	253	0.966626	0.996768	ENSMUSG00000055254	mmu:18212|	18212|	http://www.genome.jp/kegg-bin/show_pathway?mmu04010/mmu:18212%09red
Cytokine-cytokine receptor interaction	KEGG PATHWAY	mmu04060	1	264	0.971218	0.996768	ENSMUSG00000054263	mmu:16880|	16880|	http://www.genome.jp/kegg-bin/show_pathway?mmu04060/mmu:16880%09red
Neuroactive ligand-receptor interaction	KEGG PATHWAY	mmu04080	1	282	0.977413	0.996768	ENSMUSG00000027577	mmu:11438|	11438|	http://www.genome.jp/kegg-bin/show_pathway?mmu04080/mmu:11438%09red
PI3K-Akt signaling pathway	KEGG PATHWAY	mmu04151	1	351	0.991095	1	ENSMUSG00000017868	mmu:27219|	27219|	http://www.genome.jp/kegg-bin/show_pathway?mmu04151/mmu:27219%09red
Olfactory transduction	KEGG PATHWAY	mmu04740	1	1079	1	1	ENSMUSG00000057897	mmu:12323|	12323|	http://www.genome.jp/kegg-bin/show_pathway?mmu04740/mmu:12323%09red
--------------------
#Term	Database	ID	Input number	Background number	P-Value	Corrected P-Value	Input	KEGG_ID/KO	Entrez_ID	Hyperlink
--------------------
#Term	Database	ID	Input number	Background number	P-Value	Corrected P-Value	Input	KEGG_ID/KO	Entrez_ID	Hyperlink
--------------------
