# Supplementary material for: Curcumin promotes AApoAII amyloidosis and peroxisome proliferation in mice by activating the PPARα signaling pathway
Source: eLife journal article supplement (doi:10.7554/elife.63538), 2021-01-26
Supplement: supp [file elife-63538-supp-v1.zip › elife_poa_e63538_Supplementary_file_1.xlsx]

## Sheet: 2%curcumin 8-week group
	No.	Body weight (g)	heart(g)	heart/BW	liver(g)	liver/BW	spleen(g)	spleen/BW	lung(g)	lung/BW	kidney(g)	kidney/BW
	Con-1	31.448	0.156	0.00496057	1.399	0.0444861	0.122	0.00387942	0.232	0.00737726	0.221	0.00702747
	Con-2	26.078	0.137	0.00525347	1.21	0.0463993	0.102	0.00391134	0.187	0.0071708	0.183	0.00701741
	Con-3	25.403	0.133	0.0052356	1.195	0.0470417	0.112	0.00440893	0.165	0.0064953	0.163	0.00641656
	Con-4	27.816	0.125	0.00449382	1.207	0.0433923	0.094	0.00337935	0.185	0.00665085	0.172	0.00618349		group	Body Weight(avg.)	liver(avg.)	liver/BW(avg.)
	Con-5	25.145	0.138	0.00548817	1.236	0.0491549	0.115	0.00457347	0.169	0.00672102	0.178	0.00707894		Con	27.178±2.604	1.249±0.085	0.0461±0.002
	Cur-1	26.509	0.149	0.00562073	1.647	0.0621298	0.124	0.00467766	0.222	0.00837451	0.185	0.00697876		Cur	25.965±1.107	1.573±0.079	0.0606±0.001
	Cur-2	26.695	0.142	0.00531935	1.583	0.0592995	0.112	0.00419554	0.217	0.00812886	0.197	0.00737966		A-NT	25.354±1.842	1.254±0.111	0.0488±0.003
	Cur-3	24.691	0.164	0.0066421	1.49	0.0603459	0.106	0.00429306	0.202	0.00818112	0.203	0.00822162		A-Cur	26.804±1.728	1.458±0.124	0.0544±0.003
	A-NT-1	28.416	0.131	0.00461008	1.293	0.0455025	0.117	0.0041174	0.195	0.00686233	0.2	0.00703829
	A-NT-2	25.373	0.14	0.00551768	1.177	0.0463879	0.095	0.00374414	0.205	0.00807945	0.181	0.00713357
	A-NT-3	23.612	0.139	0.00588684	1.143	0.0484076	0.105	0.00444689	0.183	0.0077503	0.162	0.00686092
	A-NT-4	25.044	0.131	0.00523079	1.325	0.0529069	0.113	0.00451206	0.224	0.00894426	0.201	0.00802587
	A-NT-5	24.325	0.123	0.00505653	1.233	0.0506886	0.114	0.00468654	0.19	0.00781089	0.184	0.00756423
	A-Cur-1	28.956	0.154	0.00531841	1.656	0.0571902	0.135	0.00466225	0.209	0.00721785	0.181	0.00625086
	A-Cur-2	24.744	0.115	0.00464759	1.46	0.0590042	0.124	0.00501132	0.232	0.00937601	0.155	0.00626414
	A-Cur-3	26.278	0.137	0.00521349	1.343	0.0511074	0.113	0.00430018	0.214	0.00814369	0.166	0.00631707
	A-Cur-4	25.858	0.138	0.00533684	1.363	0.052711	0.106	0.00409931	0.219	0.00846933	0.175	0.00676773
	A-Cur-5	28.182	0.136	0.00482578	1.469	0.0521255	0.108	0.00383223	0.223	0.00791285	0.196	0.00695479

## Sheet: 2%curcumin 12-week group
	No.	Body weight (g)	heart(g)	heart/BW	liver(g)	liver/BW	spleen(g)	spleen/BW	lung(g)	lung/BW	kidney(g)	kidney/BW
	Con-1	27.398	0.153	0.00558435	1.333	0.0486532	0.14	0.00510986	0.205	0.0074823	0.196	0.00715381
	Con-2	23.361	0.135	0.00577886	1.039	0.0444758	0.086	0.00368135	0.189	0.00809041	0.184	0.00787638
	Con-3	24.278	0.137	0.00564297	1.159	0.0477387	0.113	0.00465442	0.171	0.00704341	0.195	0.00803196
	Con-4	25.138	0.145	0.00576816	1.03	0.0409738	0.068	0.00270507	0.205	0.00815498	0.196	0.00779696
	Cur-1	23.773	0.115	0.00483742	1.571	0.0660834	0.099	0.00416439	0.179	0.00752955	0.174	0.00731923		group	Body Weight(avg.)	liver(avg.)	liver/BW(avg.)
	Cur-2	23.515	0.117	0.00497555	1.262	0.0536679	0.075	0.00318945	0.179	0.00761216	0.162	0.00688922		Con	25.044±1.729	1.140±0.141	0.0455±0.003
	Cur-3	23.421	0.122	0.005209	1.495	0.0638316	0.089	0.00380001	0.175	0.00747193	0.174	0.00742923		Cur	23.570±0.182	1.443±0.161	0.0612±0.007
	A-NT-1	25.718	0.161	0.00626021	1.36	0.0528813	0.126	0.00489929	0.236	0.00917645	0.201	0.00781554		A-NT	24.878±2.044	1.217±0.147	0.0488±0.003
	A-NT-2	25.468	0.124	0.00486886	1.208	0.0474321	0.099	0.00388723	0.199	0.00781373	0.18	0.00706769		A-Cur	26.295±2.881	1.872±0.162	0.0714±0.004
	A-NT-3	21.404	0.125	0.00584003	0.981	0.0458326	0.091	0.00425154	0.17	0.00794244	0.181	0.00845636
	A-NT-4	25.034	0.115	0.00459375	1.223	0.0488536	0.107	0.00427419	0.184	0.00735	0.178	0.00711033
	A-NT-5	26.767	0.145	0.00541712	1.315	0.0491277	0.117	0.00437105	0.332	0.0124033	0.18	0.0067247
	A-Cur-1	23.976	0.131	0.0054638	1.681	0.0701118	0.093	0.00387888	0.173	0.00721555	0.188	0.00784117
	A-Cur-2	24.593	0.125	0.00508275	1.906	0.0775017	0.115	0.00467613	0.18	0.00731916	0.19	0.00772578
	A-Cur-3	24.048	0.124	0.00515635	1.726	0.0717731	0.101	0.00419993	0.167	0.00694444	0.172	0.00715236
	A-Cur-4	29.087	0.14	0.00481315	2.016	0.0693093	0.103	0.0035411	0.178	0.00611957	0.196	0.00673841
	A-Cur-5	29.772	0.129	0.00433293	2.031	0.0682185	0.144	0.00483676	0.208	0.00698643	0.213	0.00715437

## Sheet: 0.5%curcumin 8-week group
	No.	Body weight (g)	heart(g)	heart/BW	liver(g)	liver/BW	spleen(g)	spleen/BW	lung(g)	lung/BW	kidney(g)	kidney/BW
	Con-1	24.231	0.125	0.00515868	1.077	0.0444472	0.08	0.00330156	0.19	0.0078412	0.154	0.0063555
	Con-2	22.826	0.121	0.00530097	1.114	0.048804	0.096	0.00420573	0.173	0.00757908	0.152	0.00665907
	Con-3	23.685	0.121	0.00510872	1.133	0.0478362	0.113	0.00477095	0.288	0.0121596	0.148	0.00624868
	Con-4	27.207	0.146	0.00536627	1.429	0.0525232	0.143	0.005256	0.236	0.00867424	0.191	0.00702025
	Cur-1	27.783	0.133	0.0047871	1.751	0.0630242	0.101	0.00363532	0.195	0.00701868	0.216	0.00777454
	Cur-2	26.313	0.143	0.00543458	1.566	0.0595143	0.116	0.00440847	0.178	0.00676472	0.171	0.00649869
	Cur-3	25.087	0.127	0.00506238	1.456	0.058038	0.065	0.00259098	0.182	0.00725475	0.183	0.00729461
	Cur-4	25.528	0.12	0.00470072	1.428	0.0559386	0.077	0.0030163	0.207	0.00810874	0.17	0.00665935
	Cur-5	22.461	0.127	0.00565425	1.262	0.0561863	0.082	0.00365077	0.247	0.0109968	0.168	0.00747963
	A-NT-1	27.665	0.153	0.00553045	1.469	0.0530996	0.131	0.00473523	0.26	0.00939816	0.219	0.00791614
	A-NT-2	29.682	0.134	0.00451452	1.695	0.0571053	0.136	0.0045819	0.201	0.00677178	0.202	0.00680547
	A-NT-3	24.351	0.125	0.00513326	1.331	0.0546589	0.103	0.00422981	0.192	0.00788469	0.179	0.00735083
	A-NT-4	26.026	0.132	0.00507185	1.365	0.0524476	0.108	0.0041497	0.222	0.00852993	0.165	0.00633981		group	Body Weight(avg.)	liver(avg.)	liver/BW(avg.)
	A-NT-5	25.24	0.136	0.00538827	1.276	0.0505547	0.095	0.00376387	0.234	0.009271	0.155	0.00614105		Con	24.487±1.903	1.188±0.162	0.484±0.003
	A-Cur-1	29.932	0.138	0.00461045	1.92	0.0641454	0.125	0.00417613	0.214	0.00714954	0.194	0.00648136		Cur	25.434±1.953	1.493±0.181	0.585±0.003
	A-Cur-2	30.025	0.142	0.00472939	1.905	0.0634471	0.123	0.00409659	0.228	0.00759367	0.222	0.00739384		A-NT	26.593±2.114	1.427±0.165	0.536±0.002
	A-Cur-3	31.228	0.137	0.00438709	1.9	0.0608428	0.141	0.00451518	0.237	0.00758934	0.239	0.00765339		A-Cur	28.716±2.370	1.767±0.204	0.614±0.003
	A-Cur-4	25.825	0.117	0.00453049	1.463	0.0566505	0.092	0.00356244	0.2	0.00774443	0.186	0.00720232
	A-Cur-5	26.568	0.13	0.0048931	1.648	0.0620295	0.109	0.00410268	0.211	0.00794188	0.191	0.0071891

## Sheet: 0.5%curcumin 12-week group
	No.	Body weight (g)	heart(g)	heart/BW	liver(g)	liver/BW	spleen(g)	spleen/BW	lung(g)	lung/BW	kidney(g)	kidney/BW
	Con-1	32.271	0.17	0.00526789	1.838	0.0569552	0.152	0.00471011	0.239	0.00740603	0.224	0.00694122
	Con-2	26.689	0.163	0.00610739	1.332	0.0499082	0.128	0.00479598	0.191	0.00715651	0.207	0.007756
	Con-3	29.218	0.152	0.00520227	1.42	0.0486002	0.117	0.00400438	0.196	0.00670819	0.205	0.00701622
	Con-4	27.628	0.133	0.00481396	1.367	0.0494788	0.118	0.00427103	0.192	0.00694947	0.209	0.00756479
	Cur-1	29.923	0.148	0.00494603	1.711	0.0571801	0.109	0.00364268	0.206	0.00688434	0.207	0.00691776
	Cur-2	29.805	0.164	0.00550243	1.778	0.0596544	0.117	0.00392552	0.183	0.00613991	0.196	0.00657608
	Cur-3	28.811	0.168	0.00583111	2.002	0.0694873	0.146	0.00506751	0.241	0.00836486	0.22	0.00763597
	Cur-4	25.181	0.144	0.0057186	1.627	0.0646122	0.075	0.00297844	0.195	0.00774393	0.192	0.0076248
	Cur-5	27.011	0.143	0.00529414	1.724	0.0638258	0.111	0.00410944	0.196	0.0072563	0.206	0.00762652
	A-NT-1	23.394	0.117	0.00500128	1.079	0.0461229	0.074	0.0031632	0.175	0.00748055	0.179	0.00765153
	A-NT-2	25.227	0.121	0.00479645	1.262	0.0500258	0.101	0.00400365	0.209	0.00828477	0.182	0.00721449
	A-NT-3	23.201	0.118	0.00508599	1.101	0.0474549	0.096	0.00413775	0.193	0.00831861	0.159	0.00685315
	A-NT-4	27.862	0.12	0.00430694	1.231	0.044182	0.118	0.00423516	0.209	0.00750126	0.166	0.00595794		group	Body Weight(avg.)	liver(avg.)	liver/BW(avg.)
	A-NT-5	27.091	0.138	0.00509394	1.383	0.0510502	0.108	0.00398656	0.202	0.00745635	0.175	0.00645971		Con	28.952±2.447	1.489±0.235	0.0512±0.004
	A-Cur-1	27.483	0.123	0.00447549	1.499	0.0545428	0.127	0.00462104	0.199	0.00724084	0.182	0.00662228		Cur	28.146±2.027	1.768±0.141	0.0630±0.005
	A-Cur-2	22.73	0.128	0.00563132	1.493	0.0656841	0.101	0.00444347	0.197	0.00866696	0.175	0.00769908		A-NT	25.355±2.110	1.211±0.125	0.0478±0.003
	A-Cur-3	21.533	0.116	0.00538708	1.256	0.0583291	0.104	0.0048298	0.201	0.00933451	0.152	0.00705893		A-Cur	23.482±2.447	1.358±0.127	0.0580±0.005
	A-Cur-4	24.003	0.106	0.00441611	1.251	0.0521185	0.101	0.00420781	0.201	0.00837395	0.164	0.00683248
	A-Cur-5	21.663	0.112	0.00517011	1.29	0.0595485	0.126	0.00581637	0.197	0.00909385	0.156	0.00720122
