# Supplementary material for: Curcumin promotes AApoAII amyloidosis and peroxisome proliferation in mice by activating the PPARα signaling pathway
Source: eLife journal article supplement (doi:10.7554/elife.63538), 2021-01-26
Supplement: supp [file elife-63538-supp-v1.zip › elife_poa_e63538_Supplementary_file_2.xlsx]

## Sheet: higuchi-C.xls
#higuchi-AIIC, Samples Report created on 02/07/2020
higuchi-AIIC
#	Identified Proteins (369)	Accession Number	Molecular Weight	Con	Cur	A-NT	A-Cur
1	Peroxisomal bifunctional enzyme OS=Mus musculus OX=10090 GN=Ehhadh PE=1 SV=4	ECHP_MOUSE	78 kDa	123	581	107	577
2	Carbamoyl-phosphate synthase [ammonia], mitochondrial OS=Mus musculus OX=10090 GN=Cps1 PE=1 SV=2	CPSM_MOUSE	165 kDa	154	139	225	169
3	Serotransferrin OS=Mus musculus OX=10090 GN=Tf PE=1 SV=1	TRFE_MOUSE	77 kDa	151	121	163	134
4	Glycogen phosphorylase, liver form OS=Mus musculus OX=10090 GN=Pygl PE=1 SV=4	PYGL_MOUSE	97 kDa	139	118	158	110
5	NADPH--cytochrome P450 reductase OS=Mus musculus OX=10090 GN=Por PE=1 SV=2	NCPR_MOUSE	77 kDa	87	97	79	78
6	Protein disulfide-isomerase A4 OS=Mus musculus OX=10090 GN=Pdia4 PE=1 SV=3	PDIA4_MOUSE	72 kDa	78	78	99	81
7	Propionyl-CoA carboxylase alpha chain, mitochondrial OS=Mus musculus OX=10090 GN=Pcca PE=1 SV=2	PCCA_MOUSE	80 kDa	81	74	70	63
8	Peroxisomal multifunctional enzyme type 2 OS=Mus musculus OX=10090 GN=Hsd17b4 PE=1 SV=3	DHB4_MOUSE	79 kDa	58	81	56	88
9	Protein-glutamine gamma-glutamyltransferase 2 OS=Mus musculus OX=10090 GN=Tgm2 PE=1 SV=4	TGM2_MOUSE	77 kDa	53	45	59	69
10	Trifunctional enzyme subunit alpha, mitochondrial OS=Mus musculus OX=10090 GN=Hadha PE=1 SV=1	ECHA_MOUSE	83 kDa	33	43	49	80
11	Alpha-actinin-4 OS=Mus musculus OX=10090 GN=Actn4 PE=1 SV=1	ACTN4_MOUSE	105 kDa	53	46	66	54
12	C-1-tetrahydrofolate synthase, cytoplasmic OS=Mus musculus OX=10090 GN=Mthfd1 PE=1 SV=4	C1TC_MOUSE	101 kDa	46	45	59	52
13	Long-chain-fatty-acid--CoA ligase 1 OS=Mus musculus OX=10090 GN=Acsl1 PE=1 SV=2	ACSL1_MOUSE	78 kDa	39	53	44	64
14	Pyruvate carboxylase, mitochondrial OS=Mus musculus OX=10090 GN=Pc PE=1 SV=1	PYC_MOUSE	130 kDa	42	44	47	55
15	Moesin OS=Mus musculus OX=10090 GN=Msn PE=1 SV=3	MOES_MOUSE	68 kDa	43	41	35	24
16	NADH-ubiquinone oxidoreductase 75 kDa subunit, mitochondrial OS=Mus musculus OX=10090 GN=Ndufs1 PE=1 SV=2	NDUS1_MOUSE	80 kDa	46	46	35	36
17	Fatty acid synthase OS=Mus musculus OX=10090 GN=Fasn PE=1 SV=2	FAS_MOUSE	272 kDa	24	18	47	52
18	Methylcrotonoyl-CoA carboxylase subunit alpha, mitochondrial OS=Mus musculus OX=10090 GN=Mccc1 PE=1 SV=2	MCCA_MOUSE	79 kDa	61	44	32	15
19	Methylmalonyl-CoA mutase, mitochondrial OS=Mus musculus OX=10090 GN=Mmut PE=1 SV=2	MUTA_MOUSE	83 kDa	48	39	30	28
20	Endoplasmic reticulum chaperone BiP OS=Mus musculus OX=10090 GN=Hspa5 PE=1 SV=3	BIP_MOUSE	72 kDa	32	36	36	41
21	MICOS complex subunit Mic60 OS=Mus musculus OX=10090 GN=Immt PE=1 SV=1	MIC60_MOUSE	84 kDa	24	32	30	48
22	Histidine ammonia-lyase OS=Mus musculus OX=10090 GN=Hal PE=1 SV=1	HUTH_MOUSE	72 kDa	30	35	31	29
23	Calnexin OS=Mus musculus OX=10090 GN=Canx PE=1 SV=1	CALX_MOUSE	67 kDa	28	25	42	36
24	Cytosolic 10-formyltetrahydrofolate dehydrogenase OS=Mus musculus OX=10090 GN=Aldh1l1 PE=1 SV=1	AL1L1_MOUSE	99 kDa	38	32	36	26
25	Annexin A6 OS=Mus musculus OX=10090 GN=Anxa6 PE=1 SV=3	ANXA6_MOUSE	76 kDa	26	33	37	34
26	Sarcosine dehydrogenase, mitochondrial OS=Mus musculus OX=10090 GN=Sardh PE=1 SV=1	SARDH_MOUSE	102 kDa	32	30	34	31
27	Carnitine O-palmitoyltransferase 1, liver isoform OS=Mus musculus OX=10090 GN=Cpt1a PE=1 SV=4	CPT1A_MOUSE	88 kDa	28	28	31	36
28	Bifunctional UDP-N-acetylglucosamine 2-epimerase/N-acetylmannosamine kinase OS=Mus musculus OX=10090 GN=Gne PE=1 SV=1	GLCNE_MOUSE	79 kDa	40	33	30	20
29	Prolyl endopeptidase OS=Mus musculus OX=10090 GN=Prep PE=1 SV=1	PPCE_MOUSE	81 kDa	27	24	34	29
30	Radixin OS=Mus musculus OX=10090 GN=Rdx PE=1 SV=3	RADI_MOUSE	69 kDa	27	39	16	22
31	1,4-alpha-glucan-branching enzyme OS=Mus musculus OX=10090 GN=Gbe1 PE=1 SV=1	GLGB_MOUSE	80 kDa	36	32	23	19
32	Nucleolin OS=Mus musculus OX=10090 GN=Ncl PE=1 SV=2	NUCL_MOUSE	77 kDa	21	28	28	29
33	Heat shock protein HSP 90-beta OS=Mus musculus OX=10090 GN=Hsp90ab1 PE=1 SV=3	HS90B_MOUSE	83 kDa	27	22	24	24
34	Glycerol-3-phosphate dehydrogenase, mitochondrial OS=Mus musculus OX=10090 GN=Gpd2 PE=1 SV=2	GPDM_MOUSE	81 kDa	24	28	26	26
35	Dipeptidyl peptidase 3 OS=Mus musculus OX=10090 GN=Dpp3 PE=1 SV=2	DPP3_MOUSE	83 kDa	33	30	18	19
36	Transitional endoplasmic reticulum ATPase OS=Mus musculus OX=10090 GN=Vcp PE=1 SV=4	TERA_MOUSE	89 kDa	20	27	29	22
37	Complement C3 OS=Mus musculus OX=10090 GN=C3 PE=1 SV=3	CO3_MOUSE	186 kDa	16	17	32	25
38	Clathrin heavy chain 1 OS=Mus musculus OX=10090 GN=Cltc PE=1 SV=3	CLH1_MOUSE	192 kDa	21	19	34	25
39	Aconitate hydratase, mitochondrial OS=Mus musculus OX=10090 GN=Aco2 PE=1 SV=1	ACON_MOUSE	85 kDa	25	26	25	21
40	Peroxisomal acyl-coenzyme A oxidase 2 OS=Mus musculus OX=10090 GN=Acox2 PE=1 SV=2	ACOX2_MOUSE	77 kDa	18	29	22	23
41	Glycine--tRNA ligase OS=Mus musculus OX=10090 GN=Gars PE=1 SV=1	GARS_MOUSE	82 kDa	27	24	24	17
42	Endoplasmin OS=Mus musculus OX=10090 GN=Hsp90b1 PE=1 SV=2	ENPL_MOUSE	92 kDa	15	13	23	22
43	Catenin beta-1 OS=Mus musculus OX=10090 GN=Ctnnb1 PE=1 SV=1	CTNB1_MOUSE	85 kDa	20	26	25	19
44	Vesicle-fusing ATPase OS=Mus musculus OX=10090 GN=Nsf PE=1 SV=2	NSF_MOUSE	83 kDa	17	20	22	19
45	Acetyl-coenzyme A synthetase, cytoplasmic OS=Mus musculus OX=10090 GN=Acss2 PE=1 SV=2	ACSA_MOUSE	79 kDa	16	20	12	23
46	Prelamin-A/C OS=Mus musculus OX=10090 GN=Lmna PE=1 SV=2	LMNA_MOUSE	74 kDa	29	24	12	14
47	ATP-binding cassette sub-family D member 2 OS=Mus musculus OX=10090 GN=Abcd2 PE=1 SV=1	ABCD2_MOUSE	83 kDa	20	20	13	22
48	Heat shock cognate 71 kDa protein OS=Mus musculus OX=10090 GN=Hspa8 PE=1 SV=1	HSP7C_MOUSE	71 kDa	20	18	14	18
49	Ubiquitin-like modifier-activating enzyme 1 OS=Mus musculus OX=10090 GN=Uba1 PE=1 SV=1	UBA1_MOUSE	118 kDa	17	10	23	18
50	Dimethylglycine dehydrogenase, mitochondrial OS=Mus musculus OX=10090 GN=Dmgdh PE=1 SV=1	M2GD_MOUSE	97 kDa	22	9	21	13
51	Keratin, type II cytoskeletal 5 OS=Mus musculus OX=10090 GN=Krt5 PE=1 SV=1	K2C5_MOUSE	62 kDa	4	37	9	14
52	Microsomal triglyceride transfer protein large subunit OS=Mus musculus OX=10090 GN=Mttp PE=1 SV=2	MTP_MOUSE	99 kDa	14	15	15	21
53	Heterogeneous nuclear ribonucleoprotein M OS=Mus musculus OX=10090 GN=Hnrnpm PE=1 SV=3	HNRPM_MOUSE	78 kDa	24	14	17	6
54	GMP synthase [glutamine-hydrolyzing] OS=Mus musculus OX=10090 GN=Gmps PE=1 SV=2	GUAA_MOUSE	77 kDa	17	17	9	8
55	Betaine--homocysteine S-methyltransferase 1 OS=Mus musculus OX=10090 GN=Bhmt PE=1 SV=1	BHMT1_MOUSE	45 kDa	15	12	18	14
56	Calpain-1 catalytic subunit OS=Mus musculus OX=10090 GN=Capn1 PE=1 SV=1	CAN1_MOUSE	82 kDa	15	11	16	13
57	Heat shock 70 kDa protein 4 OS=Mus musculus OX=10090 GN=Hspa4 PE=1 SV=1	HSP74_MOUSE	94 kDa	13	13	15	14
58	Pregnancy zone protein OS=Mus musculus OX=10090 GN=Pzp PE=1 SV=3	PZP_MOUSE	166 kDa	11	9	17	19
59	Stress-70 protein, mitochondrial OS=Mus musculus OX=10090 GN=Hspa9 PE=1 SV=3	GRP75_MOUSE	73 kDa	8	16	16	17
60	Staphylococcal nuclease domain-containing protein 1 OS=Mus musculus OX=10090 GN=Snd1 PE=1 SV=1	SND1_MOUSE	102 kDa	18	12	15	11
61	Hydroxymethylglutaryl-CoA synthase, mitochondrial OS=Mus musculus OX=10090 GN=Hmgcs2 PE=1 SV=2	HMCS2_MOUSE	57 kDa	12	16	11	16
62	Alpha-actinin-1 OS=Mus musculus OX=10090 GN=Actn1 PE=1 SV=1	ACTN1_MOUSE	103 kDa	9	9	23	15
63	ATP synthase subunit beta, mitochondrial OS=Mus musculus OX=10090 GN=Atp5f1b PE=1 SV=2	ATPB_MOUSE	56 kDa	12	15	17	13
64	Threonine--tRNA ligase, cytoplasmic OS=Mus musculus OX=10090 GN=Tars PE=1 SV=2	SYTC_MOUSE	83 kDa	9	9	12	16
65	Serum albumin OS=Mus musculus OX=10090 GN=Alb PE=1 SV=3	ALBU_MOUSE	69 kDa	19	10	11	13
66	Deoxynucleoside triphosphate triphosphohydrolase SAMHD1 OS=Mus musculus OX=10090 GN=Samhd1 PE=1 SV=3	SAMH1_MOUSE	76 kDa	15	13	15	7
67	Myosin-9 OS=Mus musculus OX=10090 GN=Myh9 PE=1 SV=4	MYH9_MOUSE	226 kDa	4	3	18	21
68	Retinal dehydrogenase 1 OS=Mus musculus OX=10090 GN=Aldh1a1 PE=1 SV=5	AL1A1_MOUSE	54 kDa	12	10	11	17
69	Lon protease homolog, mitochondrial OS=Mus musculus OX=10090 GN=Lonp1 PE=1 SV=2	LONM_MOUSE	106 kDa	8	5	19	12
70	Ribosome-binding protein 1 OS=Mus musculus OX=10090 GN=Rrbp1 PE=1 SV=2	RRBP1_MOUSE	173 kDa	11	9	15	11
71	Plexin-B2 OS=Mus musculus OX=10090 GN=Plxnb2 PE=1 SV=1	PLXB2_MOUSE	206 kDa	15	12	13	5
72	Keratin, type I cytoskeletal 10 OS=Mus musculus OX=10090 GN=Krt10 PE=1 SV=3	K1C10_MOUSE	58 kDa	5	28	5	6
73	3-ketoacyl-CoA thiolase, mitochondrial OS=Mus musculus OX=10090 GN=Acaa2 PE=1 SV=3	THIM_MOUSE	42 kDa	10	9	9	11
74	Coatomer subunit beta OS=Mus musculus OX=10090 GN=Copb1 PE=1 SV=1	COPB_MOUSE	107 kDa	14	14	8	7
75	Hemoglobin subunit beta-1 OS=Mus musculus OX=10090 GN=Hbb-b1 PE=1 SV=2	HBB1_MOUSE	16 kDa	10	10	10	11
76	Heterogeneous nuclear ribonucleoprotein U OS=Mus musculus OX=10090 GN=Hnrnpu PE=1 SV=1	HNRPU_MOUSE	88 kDa	12	8	13	11
77	Elongation factor 1-alpha 1 OS=Mus musculus OX=10090 GN=Eef1a1 PE=1 SV=3	EF1A1_MOUSE	50 kDa	10	9	10	12
78	Ras GTPase-activating-like protein IQGAP2 OS=Mus musculus OX=10090 GN=Iqgap2 PE=1 SV=2	IQGA2_MOUSE	181 kDa	9	7	16	11
79	Peroxisomal acyl-coenzyme A oxidase 1 OS=Mus musculus OX=10090 GN=Acox1 PE=1 SV=5	ACOX1_MOUSE	75 kDa	4	19	5	18
80	Alcohol dehydrogenase 1 OS=Mus musculus OX=10090 GN=Adh1 PE=1 SV=2	ADH1_MOUSE	40 kDa	8	8	12	12
81	Carboxylesterase 1D OS=Mus musculus OX=10090 GN=Ces1d PE=1 SV=1	CES1D_MOUSE	62 kDa	9	11	12	13
82	Cholinesterase OS=Mus musculus OX=10090 GN=Bche PE=1 SV=2	CHLE_MOUSE	68 kDa	12	8	13	8
83	Elongation factor 2 OS=Mus musculus OX=10090 GN=Eef2 PE=1 SV=2	EF2_MOUSE	95 kDa	9	7	9	13
84	Urocanate hydratase OS=Mus musculus OX=10090 GN=Uroc1 PE=1 SV=2	HUTU_MOUSE	75 kDa	13	6	12	11
85	Mitochondrial proton/calcium exchanger protein OS=Mus musculus OX=10090 GN=Letm1 PE=1 SV=1	LETM1_MOUSE	83 kDa	25	16	1	1
86	Junction plakoglobin OS=Mus musculus OX=10090 GN=Jup PE=1 SV=3	PLAK_MOUSE	82 kDa	11	16	6	10
87	Thimet oligopeptidase OS=Mus musculus OX=10090 GN=Thop1 PE=1 SV=1	THOP1_MOUSE	78 kDa	11	11	9	9
88	Keratin, type I cytoskeletal 17 OS=Mus musculus OX=10090 GN=Krt17 PE=1 SV=3	K1C17_MOUSE	48 kDa	5	27	3	5
89	Lamin-B2 OS=Mus musculus OX=10090 GN=Lmnb2 PE=1 SV=2	LMNB2_MOUSE	67 kDa	5	13	11	8
90	ATP-dependent 6-phosphofructokinase, liver type OS=Mus musculus OX=10090 GN=Pfkl PE=1 SV=4	PFKAL_MOUSE	85 kDa	11	10	9	5
91	Pentatricopeptide repeat domain-containing protein 3, mitochondrial OS=Mus musculus OX=10090 GN=Ptcd3 PE=1 SV=2	PTCD3_MOUSE	78 kDa	14	11	8	7
92	Eukaryotic translation initiation factor 3 subunit C OS=Mus musculus OX=10090 GN=Eif3c PE=1 SV=1	EIF3C_MOUSE	106 kDa	8	10	13	9
93	Far upstream element-binding protein 1 OS=Mus musculus OX=10090 GN=Fubp1 PE=1 SV=1	FUBP1_MOUSE	69 kDa	10	10	9	7
94	Aldehyde dehydrogenase, mitochondrial OS=Mus musculus OX=10090 GN=Aldh2 PE=1 SV=1	ALDH2_MOUSE	57 kDa	9	5	13	6
95	Carbonic anhydrase 3 OS=Mus musculus OX=10090 GN=Ca3 PE=1 SV=3	CAH3_MOUSE	29 kDa	9	7	9	8
96	Carboxylesterase 1C OS=Mus musculus OX=10090 GN=Ces1c PE=1 SV=4	EST1C_MOUSE	61 kDa	8	7	11	8
97	General vesicular transport factor p115 OS=Mus musculus OX=10090 GN=Uso1 PE=1 SV=2	USO1_MOUSE	107 kDa	5	6	11	11
98	3-ketoacyl-CoA thiolase B, peroxisomal OS=Mus musculus OX=10090 GN=Acaa1b PE=1 SV=1	THIKB_MOUSE	44 kDa	3	13	4	14
99	Vigilin OS=Mus musculus OX=10090 GN=Hdlbp PE=1 SV=1	VIGLN_MOUSE	142 kDa	7	4	12	7
100	Lanosterol synthase OS=Mus musculus OX=10090 GN=Lss PE=1 SV=2	ERG7_MOUSE	83 kDa	3	8	7	12
101	AP-1 complex subunit beta-1 OS=Mus musculus OX=10090 GN=Ap1b1 PE=1 SV=2	AP1B1_MOUSE	104 kDa	14	6	11	3
102	ATP-dependent RNA helicase DDX1 OS=Mus musculus OX=10090 GN=Ddx1 PE=1 SV=1	DDX1_MOUSE	83 kDa	4	8	9	12
103	Actin, cytoplasmic 1 OS=Mus musculus OX=10090 GN=Actb PE=1 SV=1	ACTB_MOUSE (+1)	42 kDa	6	14	7	5
104	Catalase OS=Mus musculus OX=10090 GN=Cat PE=1 SV=4	CATA_MOUSE	60 kDa	4	6	6	8
105	60 kDa heat shock protein, mitochondrial OS=Mus musculus OX=10090 GN=Hspd1 PE=1 SV=1	CH60_MOUSE	61 kDa	7	7	9	9
106	Procollagen galactosyltransferase 1 OS=Mus musculus OX=10090 GN=Colgalt1 PE=1 SV=2	GT251_MOUSE	71 kDa	8	7	8	5
107	Neurolysin, mitochondrial OS=Mus musculus OX=10090 GN=Nln PE=1 SV=1	NEUL_MOUSE	80 kDa	10	9	5	3
108	Murinoglobulin-1 OS=Mus musculus OX=10090 GN=Mug1 PE=1 SV=3	MUG1_MOUSE	165 kDa	8	3	14	5
109	Heat shock protein HSP 90-alpha OS=Mus musculus OX=10090 GN=Hsp90aa1 PE=1 SV=4	HS90A_MOUSE	85 kDa	7	6	8	9
110	Heat shock protein 75 kDa, mitochondrial OS=Mus musculus OX=10090 GN=Trap1 PE=1 SV=1	TRAP1_MOUSE	80 kDa	8	9	8	6
111	Glutamate dehydrogenase 1, mitochondrial OS=Mus musculus OX=10090 GN=Glud1 PE=1 SV=1	DHE3_MOUSE	61 kDa	7	5	12	4
112	Spectrin alpha chain, erythrocytic 1 OS=Mus musculus OX=10090 GN=Spta1 PE=1 SV=3	SPTA1_MOUSE	280 kDa	6	4	11	8
113	Ubiquitin-60S ribosomal protein L40 OS=Mus musculus OX=10090 GN=Uba52 PE=1 SV=2	RL40_MOUSE (+3)	15 kDa	7	6	9	5
114	Protein transport protein Sec23A OS=Mus musculus OX=10090 GN=Sec23a PE=1 SV=2	SC23A_MOUSE	86 kDa	3	2	5	18
115	Lysine--tRNA ligase OS=Mus musculus OX=10090 GN=Kars PE=1 SV=1	SYK_MOUSE	68 kDa	5	9	5	7
116	Hemoglobin subunit alpha OS=Mus musculus OX=10090 GN=Hba PE=1 SV=2	HBA_MOUSE	15 kDa	6	7	8	8
117	Hemopexin OS=Mus musculus OX=10090 GN=Hpx PE=1 SV=2	HEMO_MOUSE	51 kDa	4	1	9	7
118	Arginase-1 OS=Mus musculus OX=10090 GN=Arg1 PE=1 SV=1	ARGI1_MOUSE	35 kDa	6	5	8	9
119	High mobility group nucleosome-binding domain-containing protein 5 OS=Mus musculus OX=10090 GN=Hmgn5 PE=1 SV=2	HMGN5_MOUSE	45 kDa	6	5	8	11
120	Glucosidase 2 subunit beta OS=Mus musculus OX=10090 GN=Prkcsh PE=1 SV=1	GLU2B_MOUSE	59 kDa	4	3	10	10
121	ATP synthase subunit alpha, mitochondrial OS=Mus musculus OX=10090 GN=Atp5f1a PE=1 SV=1	ATPA_MOUSE	60 kDa	7	7	7	7
122	Protein transport protein Sec31A OS=Mus musculus OX=10090 GN=Sec31a PE=1 SV=2	SC31A_MOUSE	134 kDa	5	6	8	7
123	Dynamin-1-like protein OS=Mus musculus OX=10090 GN=Dnm1l PE=1 SV=2	DNM1L_MOUSE	83 kDa	11	6	7	3
124	Exocyst complex component 5 OS=Mus musculus OX=10090 GN=Exoc5 PE=1 SV=2	EXOC5_MOUSE	82 kDa	7	8	11	2
125	Adenosylhomocysteinase OS=Mus musculus OX=10090 GN=Ahcy PE=1 SV=3	SAHH_MOUSE	48 kDa	5	6	5	5
126	Argininosuccinate synthase OS=Mus musculus OX=10090 GN=Ass1 PE=1 SV=1	ASSY_MOUSE	47 kDa	4	5	7	2
127	Cytoplasmic aconitate hydratase OS=Mus musculus OX=10090 GN=Aco1 PE=1 SV=3	ACOC_MOUSE	98 kDa	5	3	11	7
128	Protein-glucosylgalactosylhydroxylysine glucosidase OS=Mus musculus OX=10090 GN=Pgghg PE=1 SV=1	PGGHG_MOUSE	76 kDa	7	5	9	5
129	AFG3-like protein 1 OS=Mus musculus OX=10090 GN=Afg3l1 PE=1 SV=2	AFG31_MOUSE	87 kDa	8	8	3	1
130	Inter-alpha-trypsin inhibitor heavy chain H2 OS=Mus musculus OX=10090 GN=Itih2 PE=1 SV=1	ITIH2_MOUSE	106 kDa	10	4	7	1
131	Calpain-2 catalytic subunit OS=Mus musculus OX=10090 GN=Capn2 PE=1 SV=4	CAN2_MOUSE	80 kDa	6	7	6	6
132	Talin-1 OS=Mus musculus OX=10090 GN=Tln1 PE=1 SV=2	TLN1_MOUSE	270 kDa	6	6	9	5
133	Alpha-1B-glycoprotein OS=Mus musculus OX=10090 GN=A1bg PE=1 SV=1	A1BG_MOUSE	57 kDa	15	0	8	0
134	Glutamine-dependent NAD(+) synthetase OS=Mus musculus OX=10090 GN=Nadsyn1 PE=1 SV=1	NADE_MOUSE	82 kDa	8	3	4	3
135	GDH/6PGL endoplasmic bifunctional protein OS=Mus musculus OX=10090 GN=H6pd PE=1 SV=2	G6PE_MOUSE	89 kDa	4	5	6	7
136	Desmoplakin OS=Mus musculus OX=10090 GN=Dsp PE=1 SV=1	DESP_MOUSE	333 kDa	2	14	2	1
137	Mitochondrial Rho GTPase 2 OS=Mus musculus OX=10090 GN=Rhot2 PE=1 SV=1	MIRO2_MOUSE	69 kDa	9	8	4	0
138	Fructose-bisphosphate aldolase B OS=Mus musculus OX=10090 GN=Aldob PE=1 SV=3	ALDOB_MOUSE	40 kDa	4	6	5	7
139	Nucleoprotein TPR OS=Mus musculus OX=10090 GN=Tpr PE=1 SV=1	TPR_MOUSE	274 kDa	6	6	7	4
140	Sodium/potassium-transporting ATPase subunit alpha-1 OS=Mus musculus OX=10090 GN=Atp1a1 PE=1 SV=1	AT1A1_MOUSE	113 kDa	5	3	5	5
141	Pyrethroid hydrolase Ces2a OS=Mus musculus OX=10090 GN=Ces2a PE=1 SV=1	EST2A_MOUSE	62 kDa	6	3	9	4
142	Long-chain-fatty-acid--CoA ligase 4 OS=Mus musculus OX=10090 GN=Acsl4 PE=1 SV=2	ACSL4_MOUSE	79 kDa	4	6	2	7
143	26S proteasome non-ATPase regulatory subunit 1 OS=Mus musculus OX=10090 GN=Psmd1 PE=1 SV=1	PSMD1_MOUSE	106 kDa	2	4	6	7
144	NHL repeat-containing protein 2 OS=Mus musculus OX=10090 GN=Nhlrc2 PE=1 SV=1	NHLC2_MOUSE	78 kDa	6	1	5	5
145	Glycogen [starch] synthase, liver OS=Mus musculus OX=10090 GN=Gys2 PE=1 SV=2	GYS2_MOUSE	81 kDa	7	4	4	5
146	Immunoglobulin heavy constant mu OS=Mus musculus OX=10090 GN=Ighm PE=1 SV=2	IGHM_MOUSE	50 kDa	5	3	6	5
147	Neutral alpha-glucosidase AB OS=Mus musculus OX=10090 GN=Ganab PE=1 SV=1	GANAB_MOUSE	107 kDa	3	2	8	7
148	Threonine--tRNA ligase, mitochondrial OS=Mus musculus OX=10090 GN=Tars2 PE=1 SV=1	SYTM_MOUSE	82 kDa	7	4	3	1
149	Glycine dehydrogenase (decarboxylating), mitochondrial OS=Mus musculus OX=10090 GN=Gldc PE=1 SV=1	GCSP_MOUSE	113 kDa	6	1	9	2
150	Coiled-coil domain-containing protein 93 OS=Mus musculus OX=10090 GN=Ccdc93 PE=1 SV=1	CCD93_MOUSE	73 kDa	7	7	2	1
151	Histidine-rich glycoprotein OS=Mus musculus OX=10090 GN=Hrg PE=1 SV=2	HRG_MOUSE	59 kDa	5	3	7	3
152	ADP/ATP translocase 2 OS=Mus musculus OX=10090 GN=Slc25a5 PE=1 SV=3	ADT2_MOUSE	33 kDa	2	5	5	3
153	Glutamate--cysteine ligase catalytic subunit OS=Mus musculus OX=10090 GN=Gclc PE=1 SV=4	GSH1_MOUSE	73 kDa	3	5	4	9
154	Nucleolar GTP-binding protein 1 OS=Mus musculus OX=10090 GN=Gtpbp4 PE=1 SV=3	NOG1_MOUSE	74 kDa	5	4	7	2
155	Catenin delta-1 OS=Mus musculus OX=10090 GN=Ctnnd1 PE=1 SV=2	CTND1_MOUSE	105 kDa	4	0	9	2
156	von Willebrand factor A domain-containing protein 8 OS=Mus musculus OX=10090 GN=Vwa8 PE=1 SV=2	VWA8_MOUSE	213 kDa	1	6	1	6
157	Keratin, type II cytoskeletal 6A OS=Mus musculus OX=10090 GN=Krt6a PE=1 SV=3	K2C6A_MOUSE	59 kDa	0	13	1	1
158	Glyceraldehyde-3-phosphate dehydrogenase OS=Mus musculus OX=10090 GN=Gapdh PE=1 SV=2	G3P_MOUSE	36 kDa	1	4	5	3
159	Splicing factor, proline- and glutamine-rich OS=Mus musculus OX=10090 GN=Sfpq PE=1 SV=1	SFPQ_MOUSE	75 kDa	7	5	2	2
160	Delta-1-pyrroline-5-carboxylate dehydrogenase, mitochondrial OS=Mus musculus OX=10090 GN=Aldh4a1 PE=1 SV=3	AL4A1_MOUSE	62 kDa	1	4	6	5
161	Dihydropyrimidine dehydrogenase [NADP(+)] OS=Mus musculus OX=10090 GN=Dpyd PE=1 SV=1	DPYD_MOUSE	111 kDa	3	0	9	2
162	Cytoplasmic dynein 1 intermediate chain 2 OS=Mus musculus OX=10090 GN=Dync1i2 PE=1 SV=1	DC1I2_MOUSE	68 kDa	5	4	1	3
163	Prolow-density lipoprotein receptor-related protein 1 OS=Mus musculus OX=10090 GN=Lrp1 PE=1 SV=1	LRP1_MOUSE	505 kDa	3	2	6	6
164	Insulin-degrading enzyme OS=Mus musculus OX=10090 GN=Ide PE=1 SV=1	IDE_MOUSE	118 kDa	1	1	5	3
165	Inhibitor of carbonic anhydrase OS=Mus musculus OX=10090 GN=Ica PE=1 SV=1	ICA_MOUSE	77 kDa	4	0	4	5
166	Hypoxia up-regulated protein 1 OS=Mus musculus OX=10090 GN=Hyou1 PE=1 SV=1	HYOU1_MOUSE	111 kDa	0	1	7	8
167	Leucine--tRNA ligase, cytoplasmic OS=Mus musculus OX=10090 GN=Lars PE=1 SV=2	SYLC_MOUSE	134 kDa	0	0	7	9
168	Valine--tRNA ligase OS=Mus musculus OX=10090 GN=Vars PE=1 SV=1	SYVC_MOUSE	140 kDa	3	2	4	3
169	Stromal interaction molecule 1 OS=Mus musculus OX=10090 GN=Stim1 PE=1 SV=2	STIM1_MOUSE	78 kDa	3	2	4	2
170	Ran GTPase-activating protein 1 OS=Mus musculus OX=10090 GN=Rangap1 PE=1 SV=2	RAGP1_MOUSE	64 kDa	9	3	2	2
171	Carboxylesterase 1F OS=Mus musculus OX=10090 GN=Ces1f PE=1 SV=1	CES1F_MOUSE	62 kDa	4	1	5	5
172	Heterochromatin protein 1-binding protein 3 OS=Mus musculus OX=10090 GN=Hp1bp3 PE=1 SV=1	HP1B3_MOUSE	61 kDa	6	1	3	2
173	2-oxoglutarate dehydrogenase, mitochondrial OS=Mus musculus OX=10090 GN=Ogdh PE=1 SV=3	ODO1_MOUSE	116 kDa	1	2	5	7
174	Ankycorbin OS=Mus musculus OX=10090 GN=Rai14 PE=1 SV=1	RAI14_MOUSE	109 kDa	5	4	4	1
175	Platelet glycoprotein 4 OS=Mus musculus OX=10090 GN=Cd36 PE=1 SV=2	CD36_MOUSE	53 kDa	3	5	1	7
176	Fibronectin OS=Mus musculus OX=10090 GN=Fn1 PE=1 SV=4	FINC_MOUSE	273 kDa	3	0	6	5
177	Keratin, type I cytoskeletal 14 OS=Mus musculus OX=10090 GN=Krt14 PE=1 SV=2	K1C14_MOUSE	53 kDa	2	10	3	2
178	Cullin-associated NEDD8-dissociated protein 1 OS=Mus musculus OX=10090 GN=Cand1 PE=1 SV=2	CAND1_MOUSE	136 kDa	2	3	6	4
179	Glycogen phosphorylase, brain form OS=Mus musculus OX=10090 GN=Pygb PE=1 SV=3	PYGB_MOUSE	97 kDa	5	3	7	2
180	S-adenosylmethionine synthase isoform type-1 OS=Mus musculus OX=10090 GN=Mat1a PE=1 SV=1	METK1_MOUSE	44 kDa	3	3	5	3
181	Src substrate cortactin OS=Mus musculus OX=10090 GN=Cttn PE=1 SV=2	SRC8_MOUSE	61 kDa	3	6	1	2
182	Keratin, type II cytoskeletal 1 OS=Mus musculus OX=10090 GN=Krt1 PE=1 SV=4	K2C1_MOUSE	66 kDa	1	7	4	4
183	CCR4-NOT transcription complex subunit 1 OS=Mus musculus OX=10090 GN=Cnot1 PE=1 SV=2	CNOT1_MOUSE	267 kDa	3	1	6	2
184	Inter alpha-trypsin inhibitor, heavy chain 4 OS=Mus musculus OX=10090 GN=Itih4 PE=1 SV=2	ITIH4_MOUSE	105 kDa	2	0	6	5
185	Acyl-coenzyme A synthetase ACSM1, mitochondrial OS=Mus musculus OX=10090 GN=Acsm1 PE=1 SV=1	ACSM1_MOUSE	65 kDa	3	3	6	2
186	Succinate dehydrogenase [ubiquinone] flavoprotein subunit, mitochondrial OS=Mus musculus OX=10090 GN=Sdha PE=1 SV=1	SDHA_MOUSE	73 kDa	4	3	3	2
187	Methanethiol oxidase OS=Mus musculus OX=10090 GN=Selenbp1 PE=1 SV=2	SBP1_MOUSE	53 kDa	3	2	1	1
188	Keratin, type II cytoskeletal 2 epidermal OS=Mus musculus OX=10090 GN=Krt2 PE=1 SV=1	K22E_MOUSE	71 kDa	1	6	3	3
189	Keratin, type II cytoskeletal 1b OS=Mus musculus OX=10090 GN=Krt77 PE=1 SV=1	K2C1B_MOUSE	61 kDa	1	10	2	2
190	Protein transport protein Sec24A OS=Mus musculus OX=10090 GN=Sec24a PE=1 SV=1	SC24A_MOUSE	119 kDa	3	0	4	2
191	Exportin-1 OS=Mus musculus OX=10090 GN=Xpo1 PE=1 SV=1	XPO1_MOUSE	123 kDa	0	1	3	8
192	Electron transfer flavoprotein subunit alpha, mitochondrial OS=Mus musculus OX=10090 GN=Etfa PE=1 SV=2	ETFA_MOUSE	35 kDa	4	3	4	3
193	Acetyl-CoA acetyltransferase, mitochondrial OS=Mus musculus OX=10090 GN=Acat1 PE=1 SV=1	THIL_MOUSE	45 kDa	2	4	3	3
194	Protein Red OS=Mus musculus OX=10090 GN=Ik PE=1 SV=2	RED_MOUSE	66 kDa	2	2	3	1
195	Very long-chain acyl-CoA synthetase OS=Mus musculus OX=10090 GN=Slc27a2 PE=1 SV=2	S27A2_MOUSE	70 kDa	2	3	3	4
196	NAD(P) transhydrogenase, mitochondrial OS=Mus musculus OX=10090 GN=Nnt PE=1 SV=2	NNTM_MOUSE	114 kDa	4	2	3	5
197	Isocitrate dehydrogenase [NADP] cytoplasmic OS=Mus musculus OX=10090 GN=Idh1 PE=1 SV=2	IDHC_MOUSE	47 kDa	1	3	3	3
198	Scavenger receptor class B member 1 OS=Mus musculus OX=10090 GN=Scarb1 PE=1 SV=1	SCRB1_MOUSE	57 kDa	4	1	4	4
199	Clustered mitochondria protein homolog OS=Mus musculus OX=10090 GN=Cluh PE=1 SV=2	CLU_MOUSE	148 kDa	1	0	5	4
200	Medium-chain specific acyl-CoA dehydrogenase, mitochondrial OS=Mus musculus OX=10090 GN=Acadm PE=1 SV=1	ACADM_MOUSE	46 kDa	1	7	0	4
201	Elongation factor G, mitochondrial OS=Mus musculus OX=10090 GN=Gfm1 PE=1 SV=1	EFGM_MOUSE	84 kDa	1	0	2	9
202	Acylamino-acid-releasing enzyme OS=Mus musculus OX=10090 GN=Apeh PE=1 SV=3	APEH_MOUSE	82 kDa	0	0	5	9
203	Spectrin beta chain, non-erythrocytic 1 OS=Mus musculus OX=10090 GN=Sptbn1 PE=1 SV=2	SPTB2_MOUSE	274 kDa	0	0	7	4
204	Glutathione S-transferase Mu 1 OS=Mus musculus OX=10090 GN=Gstm1 PE=1 SV=2	GSTM1_MOUSE	26 kDa	2	4	3	3
205	Fatty acid-binding protein, liver OS=Mus musculus OX=10090 GN=Fabp1 PE=1 SV=2	FABPL_MOUSE	14 kDa	1	4	2	3
206	Cleavage and polyadenylation specificity factor subunit 3 OS=Mus musculus OX=10090 GN=Cpsf3 PE=1 SV=2	CPSF3_MOUSE	78 kDa	4	4	1	1
207	Eukaryotic translation initiation factor 3 subunit B OS=Mus musculus OX=10090 GN=Eif3b PE=1 SV=1	EIF3B_MOUSE	91 kDa	1	1	7	3
208	ATP-dependent RNA helicase DDX3X OS=Mus musculus OX=10090 GN=Ddx3x PE=1 SV=3	DDX3X_MOUSE	73 kDa	2	7	1	0
209	Pre-mRNA-processing-splicing factor 8 OS=Mus musculus OX=10090 GN=Prpf8 PE=1 SV=2	PRP8_MOUSE	274 kDa	0	1	4	4
210	Carboxylesterase 3A OS=Mus musculus OX=10090 GN=Ces3a PE=1 SV=2	EST3A_MOUSE	63 kDa	3	3	3	1
211	Steryl-sulfatase OS=Mus musculus OX=10090 GN=Sts PE=1 SV=1	STS_MOUSE	67 kDa	1	3	4	4
212	Cytosolic endo-beta-N-acetylglucosaminidase OS=Mus musculus OX=10090 GN=Engase PE=1 SV=1	ENASE_MOUSE	83 kDa	5	1	6	0
213	Nuclear pore complex protein Nup155 OS=Mus musculus OX=10090 GN=Nup155 PE=1 SV=1	NU155_MOUSE	155 kDa	4	3	3	1
214	Protein disulfide-isomerase OS=Mus musculus OX=10090 GN=P4hb PE=1 SV=2	PDIA1_MOUSE	57 kDa	2	3	3	1
215	Cytochrome P450 2E1 OS=Mus musculus OX=10090 GN=Cyp2e1 PE=1 SV=1	CP2E1_MOUSE	57 kDa	3	3	4	1
216	Xaa-Pro aminopeptidase 1 OS=Mus musculus OX=10090 GN=Xpnpep1 PE=1 SV=1	XPP1_MOUSE	70 kDa	2	3	3	1
217	Lysosome membrane protein 2 OS=Mus musculus OX=10090 GN=Scarb2 PE=1 SV=3	SCRB2_MOUSE	54 kDa	1	2	2	4
218	Acyl-CoA dehydrogenase family member 11 OS=Mus musculus OX=10090 GN=Acad11 PE=1 SV=2	ACD11_MOUSE	87 kDa	2	0	1	5
219	Ubiquitin-like modifier-activating enzyme ATG7 OS=Mus musculus OX=10090 GN=Atg7 PE=1 SV=1	ATG7_MOUSE	78 kDa	4	1	4	1
220	Ubiquitin carboxyl-terminal hydrolase 4 OS=Mus musculus OX=10090 GN=Usp4 PE=1 SV=3	UBP4_MOUSE	108 kDa	1	0	4	3
221	Cysteine--tRNA ligase, cytoplasmic OS=Mus musculus OX=10090 GN=Cars PE=1 SV=2	SYCC_MOUSE	95 kDa	0	2	4	3
222	ATP-dependent RNA helicase A OS=Mus musculus OX=10090 GN=Dhx9 PE=1 SV=2	DHX9_MOUSE	149 kDa	1	0	3	5
223	N-alpha-acetyltransferase 15, NatA auxiliary subunit OS=Mus musculus OX=10090 GN=Naa15 PE=1 SV=1	NAA15_MOUSE	101 kDa	0	1	3	2
224	Spectrin alpha chain, non-erythrocytic 1 OS=Mus musculus OX=10090 GN=Sptan1 PE=1 SV=4	SPTN1_MOUSE	285 kDa	0	0	8	1
225	Delta-aminolevulinic acid dehydratase OS=Mus musculus OX=10090 GN=Alad PE=1 SV=1	HEM2_MOUSE	36 kDa	2	3	2	2
226	X-ray repair cross-complementing protein 5 OS=Mus musculus OX=10090 GN=Xrcc5 PE=1 SV=4	XRCC5_MOUSE	83 kDa	2	2	2	2
227	Thiosulfate sulfurtransferase OS=Mus musculus OX=10090 GN=Tst PE=1 SV=3	THTR_MOUSE	33 kDa	1	3	3	2
228	Far upstream element-binding protein 2 OS=Mus musculus OX=10090 GN=Khsrp PE=1 SV=2	FUBP2_MOUSE	77 kDa	2	2	3	1
229	FAS-associated factor 1 OS=Mus musculus OX=10090 GN=Faf1 PE=1 SV=2	FAF1_MOUSE	74 kDa	1	4	2	2
230	Bifunctional glutamate/proline--tRNA ligase OS=Mus musculus OX=10090 GN=Eprs PE=1 SV=4	SYEP_MOUSE	170 kDa	1	2	3	2
231	L-lactate dehydrogenase A chain OS=Mus musculus OX=10090 GN=Ldha PE=1 SV=3	LDHA_MOUSE	36 kDa	1	1	3	4
232	Oxysterol-binding protein-related protein 8 OS=Mus musculus OX=10090 GN=Osbpl8 PE=1 SV=1	OSBL8_MOUSE	101 kDa	1	1	5	3
233	GTP-binding protein 1 OS=Mus musculus OX=10090 GN=Gtpbp1 PE=1 SV=2	GTPB1_MOUSE	72 kDa	2	0	3	2
234	Histone H2B type 1-B OS=Mus musculus OX=10090 GN=Hist1h2bb PE=1 SV=3	H2B1B_MOUSE (+7)	14 kDa	2	5	1	0
235	Acetyl-CoA carboxylase 2 OS=Mus musculus OX=10090 GN=Acacb PE=1 SV=1	ACACB_MOUSE	276 kDa	0	0	2	7
236	Glycine N-methyltransferase OS=Mus musculus OX=10090 GN=Gnmt PE=1 SV=3	GNMT_MOUSE	33 kDa	2	2	2	2
237	La-related protein 7 OS=Mus musculus OX=10090 GN=Larp7 PE=1 SV=2	LARP7_MOUSE	65 kDa	2	1	2	3
238	Transketolase OS=Mus musculus OX=10090 GN=Tkt PE=1 SV=1	TKT_MOUSE	68 kDa	2	1	3	2
239	4F2 cell-surface antigen heavy chain OS=Mus musculus OX=10090 GN=Slc3a2 PE=1 SV=1	4F2_MOUSE	58 kDa	1	1	2	2
240	UDP-glucuronosyltransferase 1-9 OS=Mus musculus OX=10090 GN=Ugt1a9 PE=1 SV=3	UD19_MOUSE	60 kDa	1	1	3	2
241	Long-chain specific acyl-CoA dehydrogenase, mitochondrial OS=Mus musculus OX=10090 GN=Acadl PE=1 SV=2	ACADL_MOUSE	48 kDa	1	2	2	3
242	Sulfate anion transporter 1 OS=Mus musculus OX=10090 GN=Slc26a1 PE=1 SV=1	S26A1_MOUSE	76 kDa	2	1	2	1
243	Regucalcin OS=Mus musculus OX=10090 GN=Rgn PE=1 SV=1	RGN_MOUSE	33 kDa	4	2	3	1
244	4-hydroxyphenylpyruvate dioxygenase OS=Mus musculus OX=10090 GN=Hpd PE=1 SV=3	HPPD_MOUSE	45 kDa	2	0	1	1
245	Sarcoplasmic/endoplasmic reticulum calcium ATPase 2 OS=Mus musculus OX=10090 GN=Atp2a2 PE=1 SV=2	AT2A2_MOUSE	115 kDa	3	3	0	0
246	Glycerophosphocholine phosphodiesterase GPCPD1 OS=Mus musculus OX=10090 GN=Gpcpd1 PE=1 SV=1	GPCP1_MOUSE	77 kDa	4	1	2	1
247	Mitochondrial Rho GTPase 1 OS=Mus musculus OX=10090 GN=Rhot1 PE=1 SV=1	MIRO1_MOUSE	72 kDa	2	3	2	0
248	AFG3-like protein 2 OS=Mus musculus OX=10090 GN=Afg3l2 PE=1 SV=1	AFG32_MOUSE	90 kDa	2	5	0	2
249	Inter-alpha-trypsin inhibitor heavy chain H1 OS=Mus musculus OX=10090 GN=Itih1 PE=1 SV=2	ITIH1_MOUSE	101 kDa	3	1	3	0
250	Insulin-like growth factor-binding protein complex acid labile subunit OS=Mus musculus OX=10090 GN=Igfals PE=1 SV=1	ALS_MOUSE	67 kDa	5	0	1	1
251	Serine protease inhibitor A3K OS=Mus musculus OX=10090 GN=Serpina3k PE=1 SV=2	SPA3K_MOUSE	47 kDa	2	0	4	1
252	Glutamyl aminopeptidase OS=Mus musculus OX=10090 GN=Enpep PE=1 SV=1	AMPE_MOUSE	108 kDa	1	0	4	1
253	Kininogen-1 OS=Mus musculus OX=10090 GN=Kng1 PE=1 SV=1	KNG1_MOUSE	73 kDa	1	0	3	0
254	Lipoma-preferred partner homolog OS=Mus musculus OX=10090 GN=Lpp PE=1 SV=1	LPP_MOUSE	66 kDa	5	4	0	0
255	Hemoglobin subunit beta-2 OS=Mus musculus OX=10090 GN=Hbb-b2 PE=1 SV=2	HBB2_MOUSE	16 kDa	2	1	1	2
256	DBIRD complex subunit ZNF326 OS=Mus musculus OX=10090 GN=Znf326 PE=1 SV=1	ZN326_MOUSE	65 kDa	2	2	2	1
257	Lysosome-associated membrane glycoprotein 2 OS=Mus musculus OX=10090 GN=Lamp2 PE=1 SV=2	LAMP2_MOUSE	46 kDa	1	1	2	3
258	Eukaryotic peptide chain release factor GTP-binding subunit ERF3A OS=Mus musculus OX=10090 GN=Gspt1 PE=1 SV=2	ERF3A_MOUSE	69 kDa	1	2	1	1
259	Exocyst complex component 8 OS=Mus musculus OX=10090 GN=Exoc8 PE=1 SV=1	EXOC8_MOUSE	81 kDa	4	0	0	1
260	Uricase OS=Mus musculus OX=10090 GN=Uox PE=1 SV=2	URIC_MOUSE	35 kDa	1	1	2	3
261	Plectin OS=Mus musculus OX=10090 GN=Plec PE=1 SV=3	PLEC_MOUSE	534 kDa	1	1	2	2
262	Extracellular matrix protein 1 OS=Mus musculus OX=10090 GN=Ecm1 PE=1 SV=2	ECM1_MOUSE	63 kDa	2	1	2	0
263	Solute carrier family 22 member 27 OS=Mus musculus OX=10090 GN=Slc22a27 PE=1 SV=1	S22AR_MOUSE	62 kDa	1	1	2	1
264	ATP-binding cassette sub-family D member 3 OS=Mus musculus OX=10090 GN=Abcd3 PE=1 SV=2	ABCD3_MOUSE	75 kDa	1	3	0	3
265	85/88 kDa calcium-independent phospholipase A2 OS=Mus musculus OX=10090 GN=Pla2g6 PE=1 SV=3	PLPL9_MOUSE	90 kDa	0	4	1	2
266	Melanoma inhibitory activity protein 2 OS=Mus musculus OX=10090 GN=Mia2 PE=1 SV=3	MIA2_MOUSE	156 kDa	4	2	0	1
267	Cold shock domain-containing protein E1 OS=Mus musculus OX=10090 GN=Csde1 PE=1 SV=1	CSDE1_MOUSE	89 kDa	0	0	3	2
268	Isoleucine--tRNA ligase, cytoplasmic OS=Mus musculus OX=10090 GN=Iars PE=1 SV=2	SYIC_MOUSE	144 kDa	0	0	3	1
269	Annexin A2 OS=Mus musculus OX=10090 GN=Anxa2 PE=1 SV=2	ANXA2_MOUSE	39 kDa	0	8	0	0
270	Electron transfer flavoprotein-ubiquinone oxidoreductase, mitochondrial OS=Mus musculus OX=10090 GN=Etfdh PE=1 SV=1	ETFD_MOUSE	68 kDa	1	1	1	2
271	Peptidylprolyl isomerase domain and WD repeat-containing protein 1 OS=Mus musculus OX=10090 GN=Ppwd1 PE=1 SV=2	PPWD1_MOUSE	73 kDa	2	2	2	1
272	Cordon-bleu protein-like 1 OS=Mus musculus OX=10090 GN=Cobll1 PE=1 SV=2	COBL1_MOUSE	137 kDa	1	2	1	2
273	Corticosteroid 11-beta-dehydrogenase isozyme 1 OS=Mus musculus OX=10090 GN=Hsd11b1 PE=1 SV=3	DHI1_MOUSE	32 kDa	1	1	2	1
274	AP-1 complex subunit gamma-1 OS=Mus musculus OX=10090 GN=Ap1g1 PE=1 SV=3	AP1G1_MOUSE	91 kDa	0	2	0	1
275	Cystathionine gamma-lyase OS=Mus musculus OX=10090 GN=Cth PE=1 SV=1	CGL_MOUSE	44 kDa	1	1	2	1
276	Protein disulfide-isomerase A3 OS=Mus musculus OX=10090 GN=Pdia3 PE=1 SV=2	PDIA3_MOUSE	57 kDa	1	0	2	1
277	Torsin-1A-interacting protein 2 OS=Mus musculus OX=10090 GN=Tor1aip2 PE=1 SV=1	TOIP2_MOUSE	54 kDa	1	3	0	1
278	Eukaryotic translation initiation factor 4 gamma 1 OS=Mus musculus OX=10090 GN=Eif4g1 PE=1 SV=1	IF4G1_MOUSE	176 kDa	0	1	2	2
279	Endoplasmic reticulum aminopeptidase 1 OS=Mus musculus OX=10090 GN=Erap1 PE=1 SV=2	ERAP1_MOUSE	107 kDa	1	0	5	0
280	Heterogeneous nuclear ribonucleoprotein Q OS=Mus musculus OX=10090 GN=Syncrip PE=1 SV=2	HNRPQ_MOUSE	70 kDa	2	1	1	2
281	Heterogeneous nuclear ribonucleoprotein U-like protein 2 OS=Mus musculus OX=10090 GN=Hnrnpul2 PE=1 SV=2	HNRL2_MOUSE	85 kDa	1	1	2	1
282	Coatomer subunit alpha OS=Mus musculus OX=10090 GN=Copa PE=1 SV=2	COPA_MOUSE	138 kDa	0	1	1	2
283	Dihydrolipoyl dehydrogenase, mitochondrial OS=Mus musculus OX=10090 GN=Dld PE=1 SV=2	DLDH_MOUSE	54 kDa	2	1	0	1
284	Lysosomal alpha-mannosidase OS=Mus musculus OX=10090 GN=Man2b1 PE=1 SV=4	MA2B1_MOUSE	115 kDa	2	1	1	0
285	Constitutive coactivator of PPAR-gamma-like protein 1 OS=Mus musculus OX=10090 GN=FAM120A PE=1 SV=2	F120A_MOUSE	122 kDa	2	1	1	1
286	Interleukin enhancer-binding factor 3 OS=Mus musculus OX=10090 GN=Ilf3 PE=1 SV=2	ILF3_MOUSE	96 kDa	1	1	2	0
287	Structural maintenance of chromosomes protein 3 OS=Mus musculus OX=10090 GN=Smc3 PE=1 SV=2	SMC3_MOUSE	142 kDa	0	1	2	1
288	DDB1- and CUL4-associated factor 8 OS=Mus musculus OX=10090 GN=Dcaf8 PE=1 SV=1	DCAF8_MOUSE	66 kDa	0	0	2	1
289	Metastasis-associated protein MTA2 OS=Mus musculus OX=10090 GN=Mta2 PE=1 SV=1	MTA2_MOUSE	75 kDa	3	1	1	0
290	Apolipoprotein B-100 OS=Mus musculus OX=10090 GN=Apob PE=1 SV=1	APOB_MOUSE	509 kDa	0	0	2	4
291	Protein Noxp20 OS=Mus musculus OX=10090 GN=Fam114a1 PE=1 SV=1	NXP20_MOUSE	61 kDa	0	0	2	1
292	Eukaryotic translation initiation factor 4B OS=Mus musculus OX=10090 GN=Eif4b PE=1 SV=1	IF4B_MOUSE	69 kDa	1	0	0	5
293	Long-chain-fatty-acid--CoA ligase 5 OS=Mus musculus OX=10090 GN=Acsl5 PE=1 SV=1	ACSL5_MOUSE	76 kDa	0	0	0	2
294	Prothrombin OS=Mus musculus OX=10090 GN=F2 PE=1 SV=1	THRB_MOUSE	70 kDa	0	0	1	2
295	4-hydroxy-2-oxoglutarate aldolase, mitochondrial OS=Mus musculus OX=10090 GN=Hoga1 PE=1 SV=1	HOGA1_MOUSE	35 kDa	1	1	2	2
296	Ubiquilin-2 OS=Mus musculus OX=10090 GN=Ubqln2 PE=1 SV=2	UBQL2_MOUSE	67 kDa	2	2	1	1
297	Methylmalonate-semialdehyde dehydrogenase [acylating], mitochondrial OS=Mus musculus OX=10090 GN=Aldh6a1 PE=1 SV=1	MMSA_MOUSE	58 kDa	1	2	2	0
298	Matrin-3 OS=Mus musculus OX=10090 GN=Matr3 PE=1 SV=1	MATR3_MOUSE	95 kDa	0	2	1	1
299	Peroxisomal carnitine O-octanoyltransferase OS=Mus musculus OX=10090 GN=Crot PE=1 SV=1	OCTC_MOUSE	70 kDa	0	1	2	1
300	Translation initiation factor IF-2, mitochondrial OS=Mus musculus OX=10090 GN=Mtif2 PE=1 SV=2	IF2M_MOUSE	81 kDa	2	3	0	0
301	Eukaryotic translation initiation factor 3 subunit A OS=Mus musculus OX=10090 GN=Eif3a PE=1 SV=5	EIF3A_MOUSE	162 kDa	0	0	1	2
302	Short-chain specific acyl-CoA dehydrogenase, mitochondrial OS=Mus musculus OX=10090 GN=Acads PE=1 SV=2	ACADS_MOUSE	45 kDa	0	0	2	1
303	Acetyl-CoA carboxylase 1 OS=Mus musculus OX=10090 GN=Acaca PE=1 SV=1	ACACA_MOUSE	265 kDa	0	0	2	2
304	Keratin, type II cytoskeletal 8 OS=Mus musculus OX=10090 GN=Krt8 PE=1 SV=4	K2C8_MOUSE	55 kDa	0	0	3	2
305	Protein LYRIC OS=Mus musculus OX=10090 GN=Mtdh PE=1 SV=1	LYRIC_MOUSE	64 kDa	3	2	0	0
306	Cytochrome P450 4A14 OS=Mus musculus OX=10090 GN=Cyp4a14 PE=1 SV=1	CP4AE_MOUSE	59 kDa	0	0	0	2
307	Nck-associated protein 1 OS=Mus musculus OX=10090 GN=Nckap1 PE=1 SV=2	NCKP1_MOUSE	129 kDa	0	0	3	1
308	Keratin, type I cytoskeletal 16 OS=Mus musculus OX=10090 GN=Krt16 PE=1 SV=3	K1C16_MOUSE	52 kDa	0	3	0	1
309	Triosephosphate isomerase OS=Mus musculus OX=10090 GN=Tpi1 PE=1 SV=4	TPIS_MOUSE	32 kDa	0	1	1	2
310	Fructose-1,6-bisphosphatase 1 OS=Mus musculus OX=10090 GN=Fbp1 PE=1 SV=3	F16P1_MOUSE	37 kDa	1	0	2	1
311	Electron transfer flavoprotein subunit beta OS=Mus musculus OX=10090 GN=Etfb PE=1 SV=3	ETFB_MOUSE	28 kDa	2	0	1	1
312	Protein mono-ADP-ribosyltransferase PARP12 OS=Mus musculus OX=10090 GN=Parp12 PE=1 SV=3	PAR12_MOUSE	80 kDa	0	2	0	1
313	Small ubiquitin-related modifier 1 OS=Mus musculus OX=10090 GN=Sumo1 PE=1 SV=1	SUMO1_MOUSE	12 kDa	2	0	1	0
314	RNA-binding protein 25 OS=Mus musculus OX=10090 GN=Rbm25 PE=1 SV=2	RBM25_MOUSE	100 kDa	0	1	1	2
315	Dynamin-like 120 kDa protein, mitochondrial OS=Mus musculus OX=10090 GN=Opa1 PE=1 SV=1	OPA1_MOUSE	111 kDa	0	1	2	1
316	GRIP1-associated protein 1 OS=Mus musculus OX=10090 GN=Gripap1 PE=1 SV=1	GRAP1_MOUSE	93 kDa	0	1	2	0
317	Sorbitol dehydrogenase OS=Mus musculus OX=10090 GN=Sord PE=1 SV=3	DHSO_MOUSE	38 kDa	1	1	3	0
318	Solute carrier organic anion transporter family member 1A1 OS=Mus musculus OX=10090 GN=Slco1a1 PE=1 SV=1	SO1A1_MOUSE	74 kDa	1	0	3	1
319	Estradiol 17 beta-dehydrogenase 5 OS=Mus musculus OX=10090 GN=Akr1c6 PE=1 SV=1	DHB5_MOUSE	37 kDa	1	0	2	1
320	3-ketoacyl-CoA thiolase A, peroxisomal OS=Mus musculus OX=10090 GN=Acaa1a PE=1 SV=1	THIKA_MOUSE	44 kDa	0	2	0	3
321	Receptor-type tyrosine-protein phosphatase delta OS=Mus musculus OX=10090 GN=Ptprd PE=1 SV=3	PTPRD_MOUSE	214 kDa	1	0	2	0
322	NEDD8 ultimate buster 1 OS=Mus musculus OX=10090 GN=Nub1 PE=1 SV=2	NUB1_MOUSE	70 kDa	0	3	1	0
323	Nucleolar RNA helicase 2 OS=Mus musculus OX=10090 GN=Ddx21 PE=1 SV=3	DDX21_MOUSE	94 kDa	0	0	1	2
324	Dolichyl-diphosphooligosaccharide--protein glycosyltransferase subunit 1 OS=Mus musculus OX=10090 GN=Rpn1 PE=1 SV=1	RPN1_MOUSE	69 kDa	0	0	2	1
325	Cytoplasmic dynein 1 heavy chain 1 OS=Mus musculus OX=10090 GN=Dync1h1 PE=1 SV=2	DYHC1_MOUSE	532 kDa	0	0	2	1
326	Aspartyl/asparaginyl beta-hydroxylase OS=Mus musculus OX=10090 GN=Asph PE=1 SV=1	ASPH_MOUSE	83 kDa	0	0	3	0
327	Leucine-rich PPR motif-containing protein, mitochondrial OS=Mus musculus OX=10090 GN=Lrpprc PE=1 SV=2	LPPRC_MOUSE	157 kDa	0	0	3	0
328	Cytochrome P450 3A41 OS=Mus musculus OX=10090 GN=Cyp3a41a PE=1 SV=2	CP341_MOUSE	58 kDa	1	0	2	1
329	Cleavage stimulation factor subunit 3 OS=Mus musculus OX=10090 GN=Cstf3 PE=1 SV=1	CSTF3_MOUSE	83 kDa	0	1	2	1
330	Filamin-A OS=Mus musculus OX=10090 GN=Flna PE=1 SV=5	FLNA_MOUSE	281 kDa	0	1	2	1
331	4-aminobutyrate aminotransferase, mitochondrial OS=Mus musculus OX=10090 GN=Abat PE=1 SV=1	GABT_MOUSE	56 kDa	1	0	2	1
332	Serrate RNA effector molecule homolog OS=Mus musculus OX=10090 GN=Srrt PE=1 SV=1	SRRT_MOUSE	100 kDa	0	1	2	1
333	Ectonucleoside triphosphate diphosphohydrolase 8 OS=Mus musculus OX=10090 GN=Entpd8 PE=1 SV=3	ENTP8_MOUSE	55 kDa	2	0	2	0
334	Mannosyl-oligosaccharide glucosidase OS=Mus musculus OX=10090 GN=Mogs PE=1 SV=1	MOGS_MOUSE	92 kDa	2	1	0	0
335	Signal transducer and activator of transcription 3 OS=Mus musculus OX=10090 GN=Stat3 PE=1 SV=2	STAT3_MOUSE	88 kDa	0	0	1	2
336	AP-2 complex subunit alpha-2 OS=Mus musculus OX=10090 GN=Ap2a2 PE=1 SV=2	AP2A2_MOUSE	104 kDa	3	0	0	1
337	Protein-glutamine gamma-glutamyltransferase K OS=Mus musculus OX=10090 GN=Tgm1 PE=1 SV=2	TGM1_MOUSE	90 kDa	0	2	1	0
338	Alkaline phosphatase, tissue-nonspecific isozyme OS=Mus musculus OX=10090 GN=Alpl PE=1 SV=2	PPBT_MOUSE	58 kDa	0	1	0	2
339	Protein transport protein Sec23B OS=Mus musculus OX=10090 GN=Sec23b PE=1 SV=1	SC23B_MOUSE	86 kDa	0	0	1	3
340	Signal transducer and activator of transcription 5A OS=Mus musculus OX=10090 GN=Stat5a PE=1 SV=1	STA5A_MOUSE (+1)	91 kDa	2	0	0	0
341	Trifunctional enzyme subunit beta, mitochondrial OS=Mus musculus OX=10090 GN=Hadhb PE=1 SV=1	ECHB_MOUSE	51 kDa	0	0	0	2
342	Triokinase/FMN cyclase OS=Mus musculus OX=10090 GN=Tkfc PE=1 SV=1	TKFC_MOUSE	60 kDa	0	0	4	0
343	Disintegrin and metalloproteinase domain-containing protein 23 OS=Mus musculus OX=10090 GN=Adam23 PE=1 SV=1	ADA23_MOUSE	92 kDa	1	0	2	0
344	AP-2 complex subunit beta OS=Mus musculus OX=10090 GN=Ap2b1 PE=1 SV=1	AP2B1_MOUSE	105 kDa	2	1	0	0
345	Carboxypeptidase N subunit 2 OS=Mus musculus OX=10090 GN=Cpn2 PE=1 SV=2	CPN2_MOUSE	60 kDa	1	0	2	0
346	Bifunctional epoxide hydrolase 2 OS=Mus musculus OX=10090 GN=Ephx2 PE=1 SV=2	HYES_MOUSE	63 kDa	0	1	0	2
347	Integrator complex subunit 10 OS=Mus musculus OX=10090 GN=Ints10 PE=1 SV=3	INT10_MOUSE	82 kDa	1	0	2	0
348	Keratin, type I cytoskeletal 42 OS=Mus musculus OX=10090 GN=Krt42 PE=1 SV=1	K1C42_MOUSE	50 kDa	0	2	0	1
349	Unconventional myosin-Ic OS=Mus musculus OX=10090 GN=Myo1c PE=1 SV=2	MYO1C_MOUSE	122 kDa	0	0	2	1
350	Calcium-independent phospholipase A2-gamma OS=Mus musculus OX=10090 GN=Pnpla8 PE=1 SV=1	PLPL8_MOUSE	87 kDa	2	1	0	0
351	Tropomyosin alpha-3 chain OS=Mus musculus OX=10090 GN=Tpm3 PE=1 SV=3	TPM3_MOUSE	33 kDa	1	2	0	0
352	Pinin OS=Mus musculus OX=10090 GN=Pnn PE=1 SV=4	PININ_MOUSE	82 kDa	0	0	2	0
353	Keratin, type II cytoskeletal 79 OS=Mus musculus OX=10090 GN=Krt79 PE=1 SV=2	K2C79_MOUSE	58 kDa	0	2	0	0
354	Spectrin beta chain, erythrocytic OS=Mus musculus OX=10090 GN=Sptb PE=1 SV=4	SPTB1_MOUSE	245 kDa	0	0	3	0
355	Heat shock 70 kDa protein 12A OS=Mus musculus OX=10090 GN=Hspa12a PE=1 SV=1	HS12A_MOUSE	75 kDa	2	0	0	0
356	Aldehyde dehydrogenase X, mitochondrial OS=Mus musculus OX=10090 GN=Aldh1b1 PE=1 SV=1	AL1B1_MOUSE	58 kDa	2	0	0	0
357	Aminopeptidase N OS=Mus musculus OX=10090 GN=Anpep PE=1 SV=4	AMPN_MOUSE	110 kDa	0	0	2	0
358	Alpha-amylase 1 OS=Mus musculus OX=10090 GN=Amy1 PE=1 SV=2	AMY1_MOUSE	58 kDa	0	0	2	0
359	Cadherin-2 OS=Mus musculus OX=10090 GN=Cdh2 PE=1 SV=2	CADH2_MOUSE	100 kDa	0	0	2	0
360	Cell cycle and apoptosis regulator protein 2 OS=Mus musculus OX=10090 GN=Ccar2 PE=1 SV=2	CCAR2_MOUSE	103 kDa	0	0	0	2
361	Catenin alpha-1 OS=Mus musculus OX=10090 GN=Ctnna1 PE=1 SV=1	CTNA1_MOUSE	100 kDa	0	0	2	0
362	Cullin-2 OS=Mus musculus OX=10090 GN=Cul2 PE=1 SV=2	CUL2_MOUSE	87 kDa	0	0	0	2
363	Exocyst complex component 2 OS=Mus musculus OX=10090 GN=Exoc2 PE=1 SV=1	EXOC2_MOUSE	104 kDa	0	0	2	0
364	Lamin-B1 OS=Mus musculus OX=10090 GN=Lmnb1 PE=1 SV=3	LMNB1_MOUSE	67 kDa	0	2	0	0
365	2-oxoisovalerate dehydrogenase subunit alpha, mitochondrial OS=Mus musculus OX=10090 GN=Bckdha PE=1 SV=1	ODBA_MOUSE	50 kDa	0	0	0	2
366	Basement membrane-specific heparan sulfate proteoglycan core protein OS=Mus musculus OX=10090 GN=Hspg2 PE=1 SV=1	PGBM_MOUSE	398 kDa	0	0	2	0
367	Histone-lysine N-methyltransferase PRDM16 OS=Mus musculus OX=10090 GN=Prdm16 PE=1 SV=1	PRD16_MOUSE	141 kDa	0	2	0	0
368	Regulator of nonsense transcripts 1 OS=Mus musculus OX=10090 GN=Upf1 PE=1 SV=2	RENT1_MOUSE	124 kDa	0	0	2	0
369	Torsin-1A-interacting protein 1 OS=Mus musculus OX=10090 GN=Tor1aip1 PE=1 SV=3	TOIP1_MOUSE	67 kDa	0	2	0	0
END OF FILE
