# Supplementary figures and images for: Curcumin promotes AApoAII amyloidosis and peroxisome proliferation in mice by activating the PPARα signaling pathway
Source: eLife journal article supplement (doi:10.7554/elife.63538), 2021-01-26

Figure 1-figure supplement 2

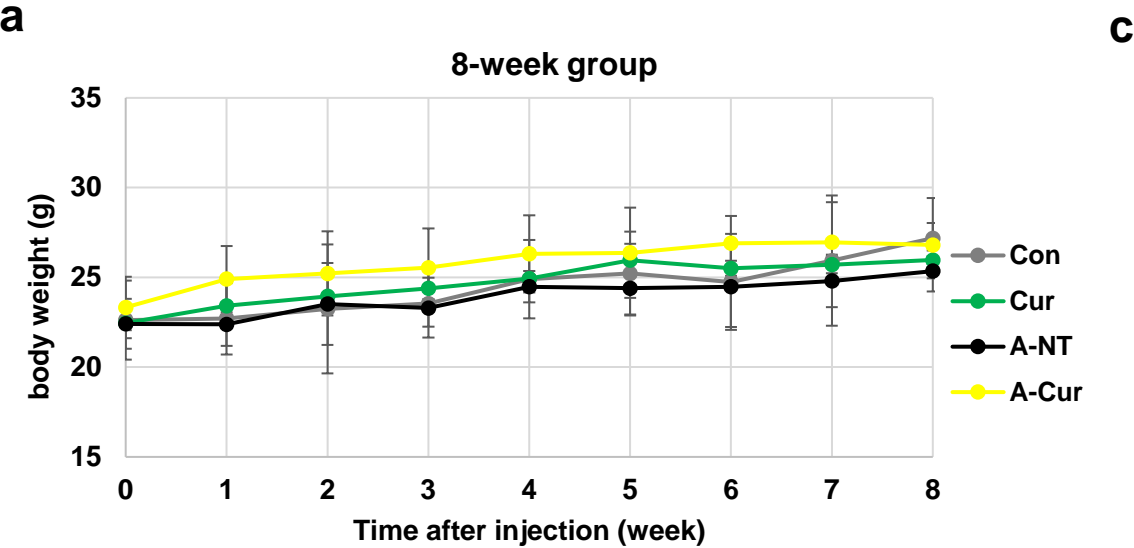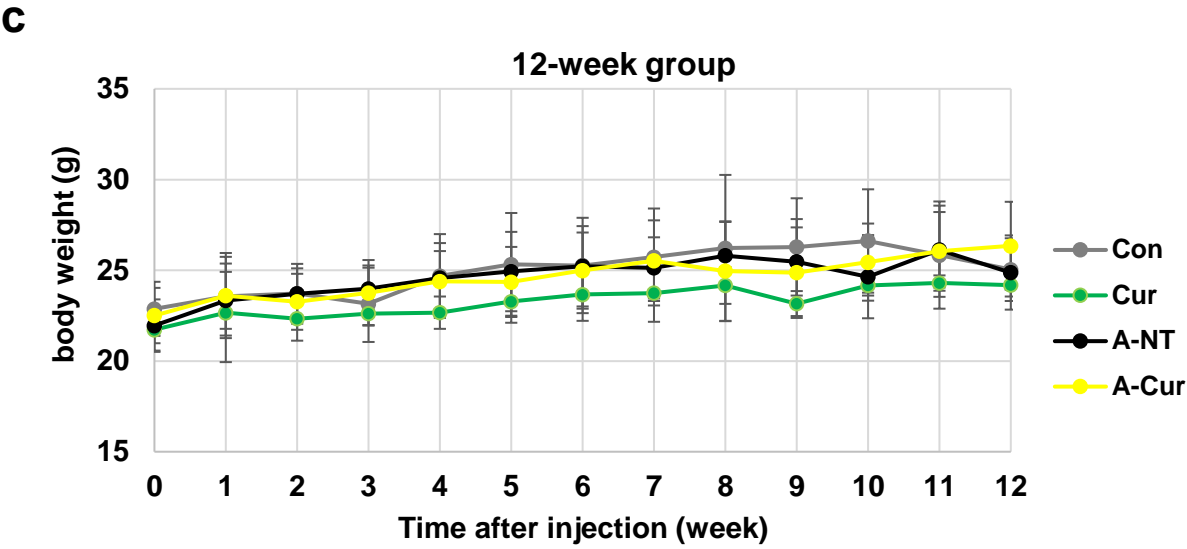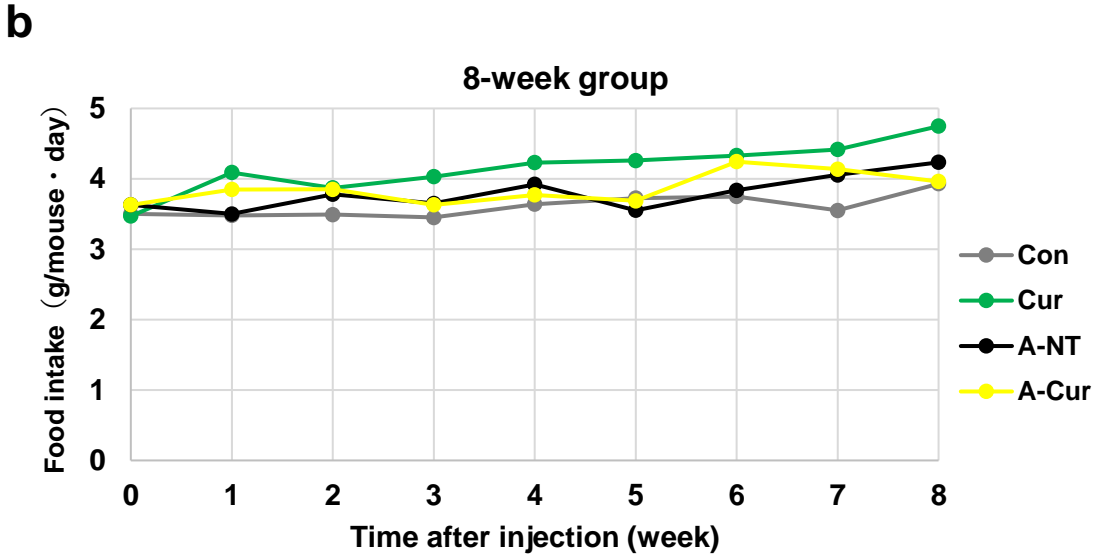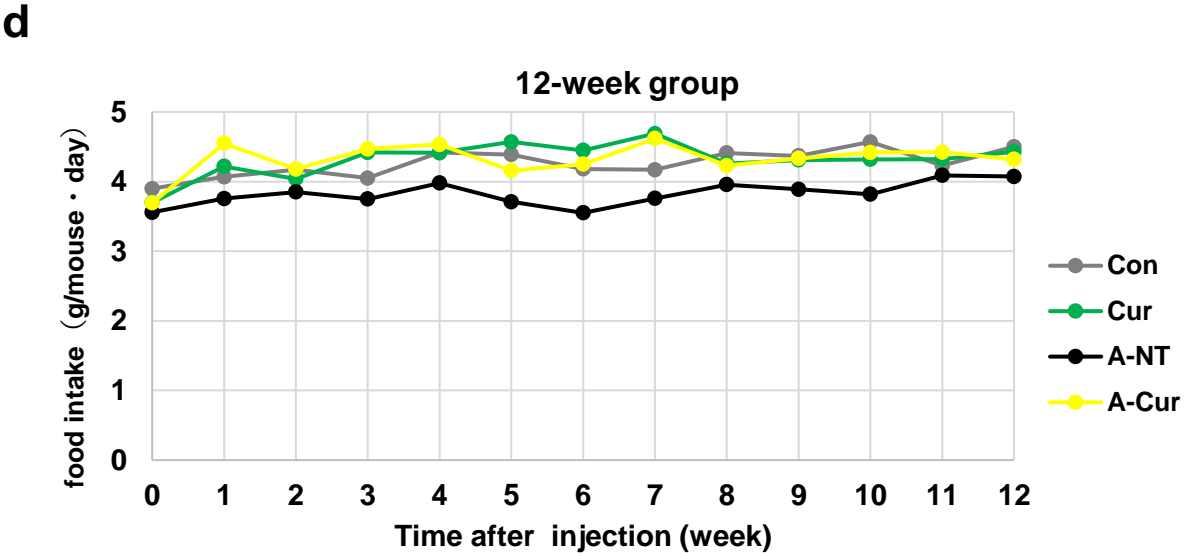

Supplement: supp [file elife-63538-supp-v1.zip › elife_poa_e63538_Figure_1_figure_supplement_2.pdf]

Figure 1-figure supplement 3

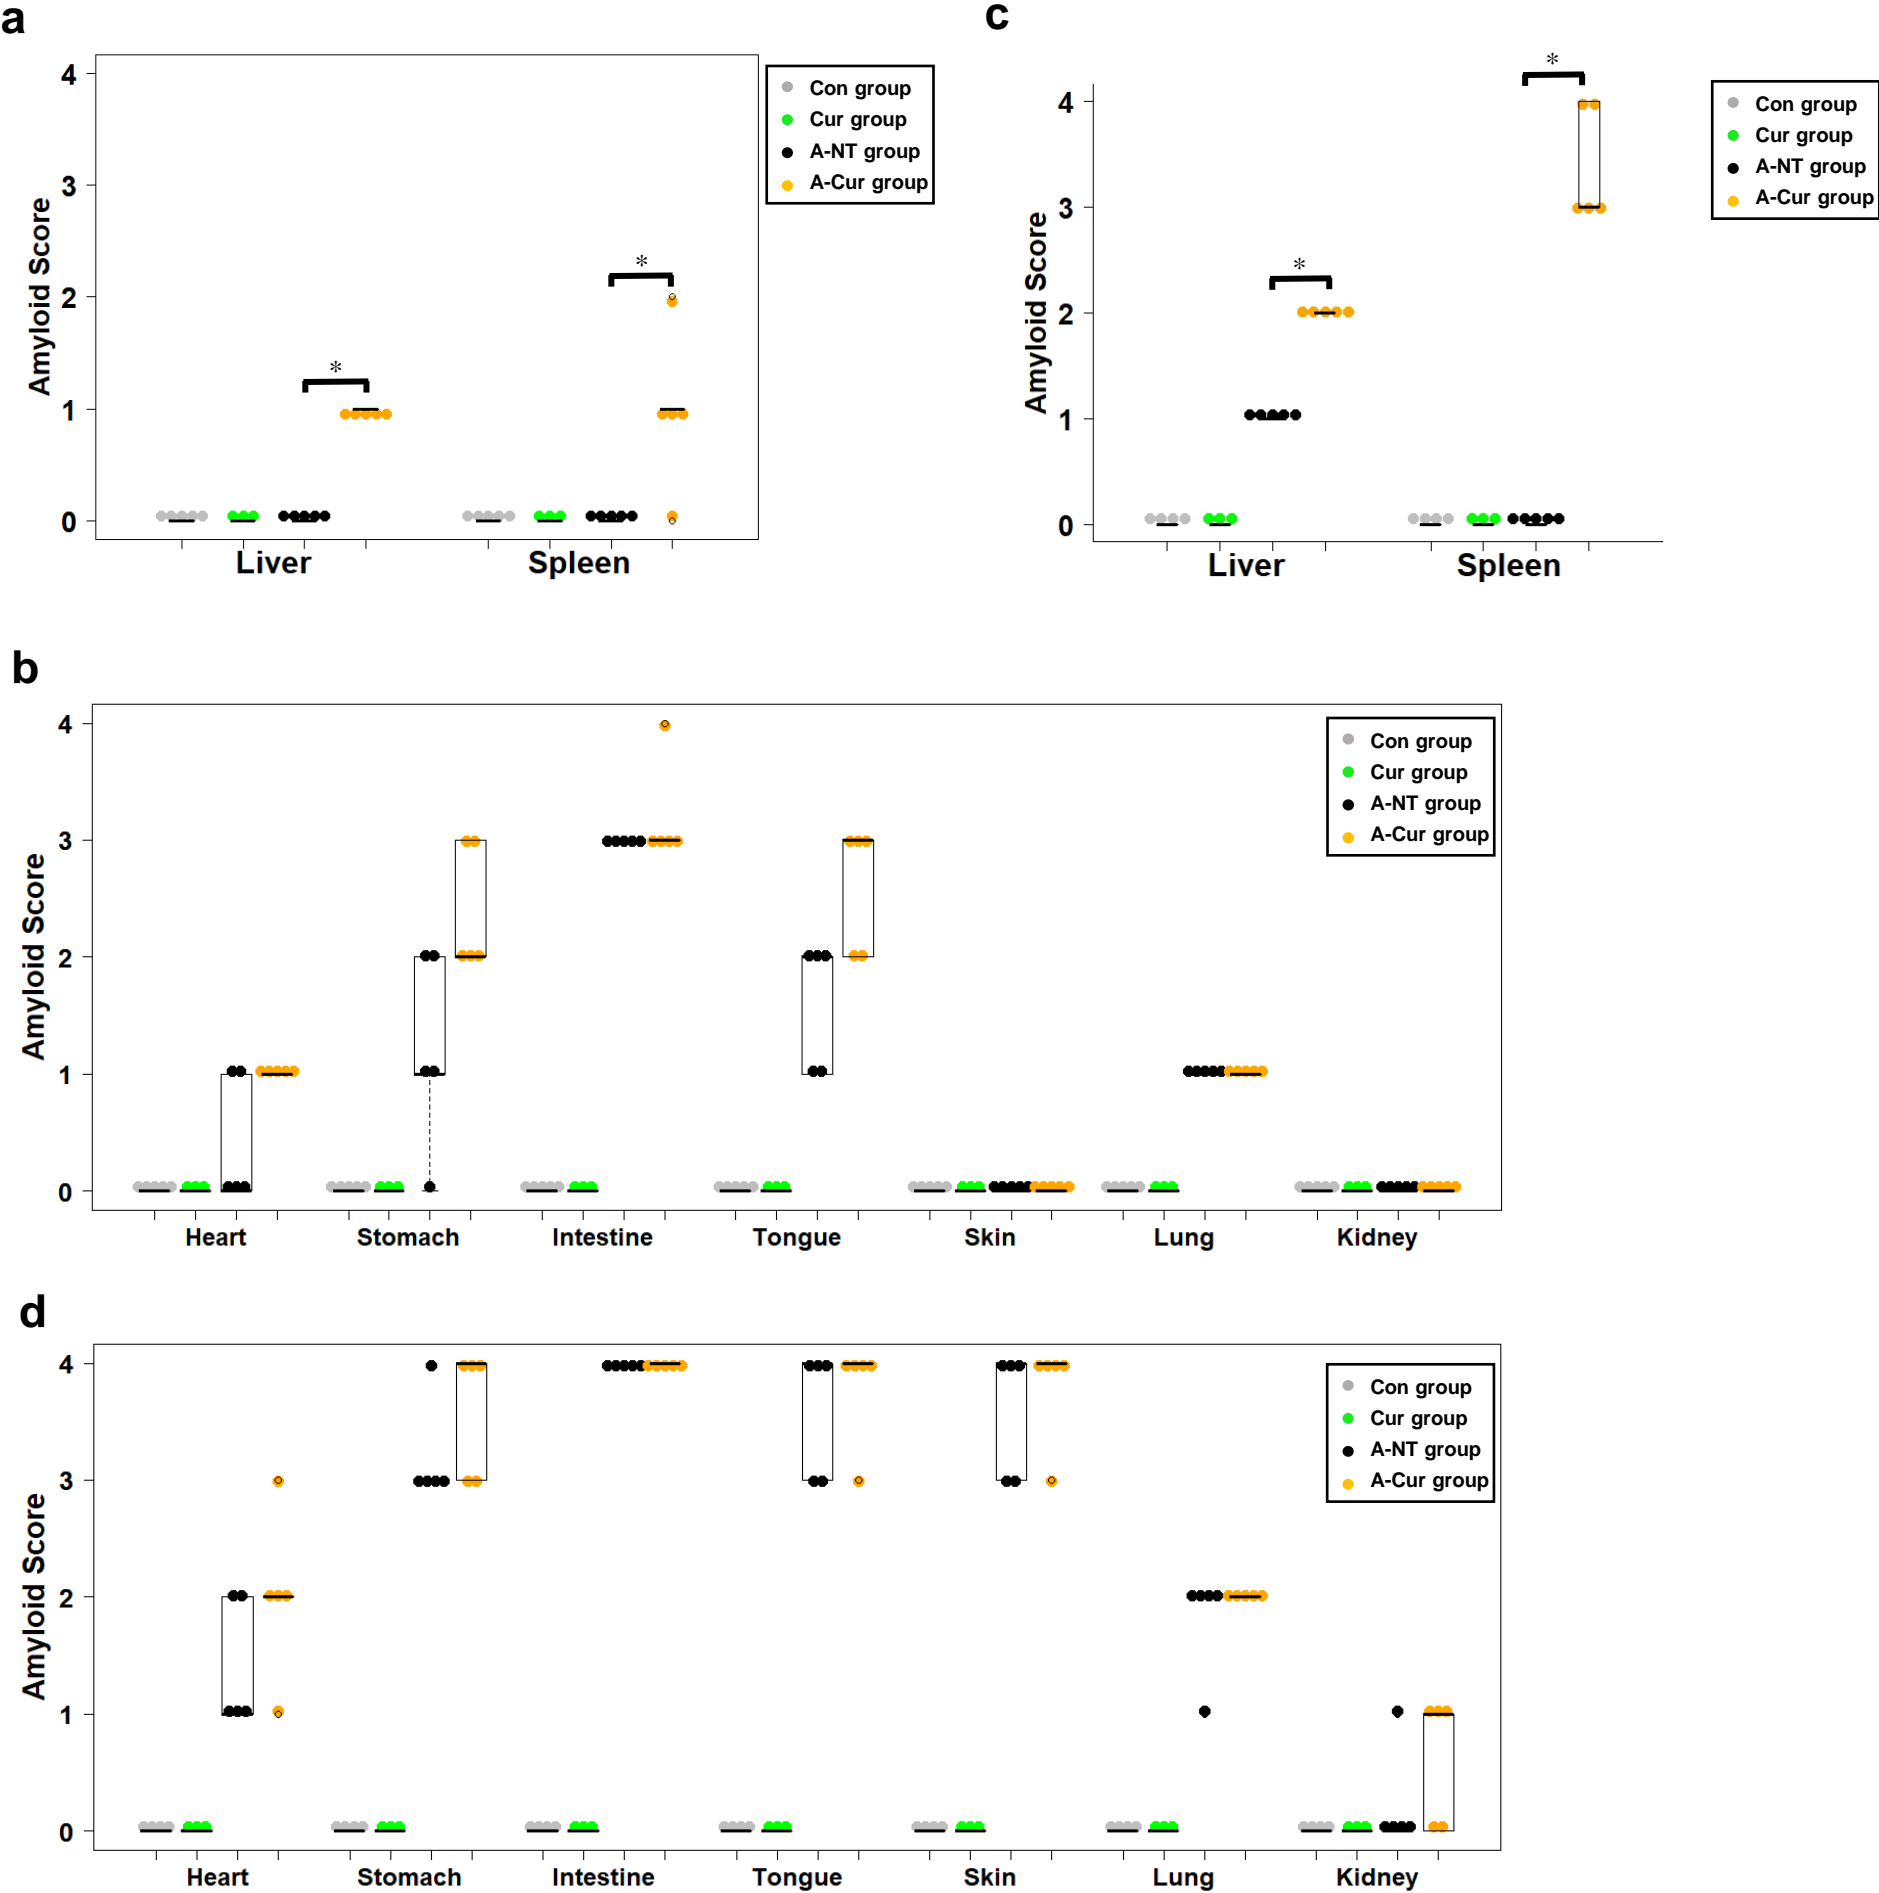

Supplement: supp [file elife-63538-supp-v1.zip › elife_poa_e63538_Figure_1_figure_supplement_3.pdf]

Figure 1-figure supplement 4

a

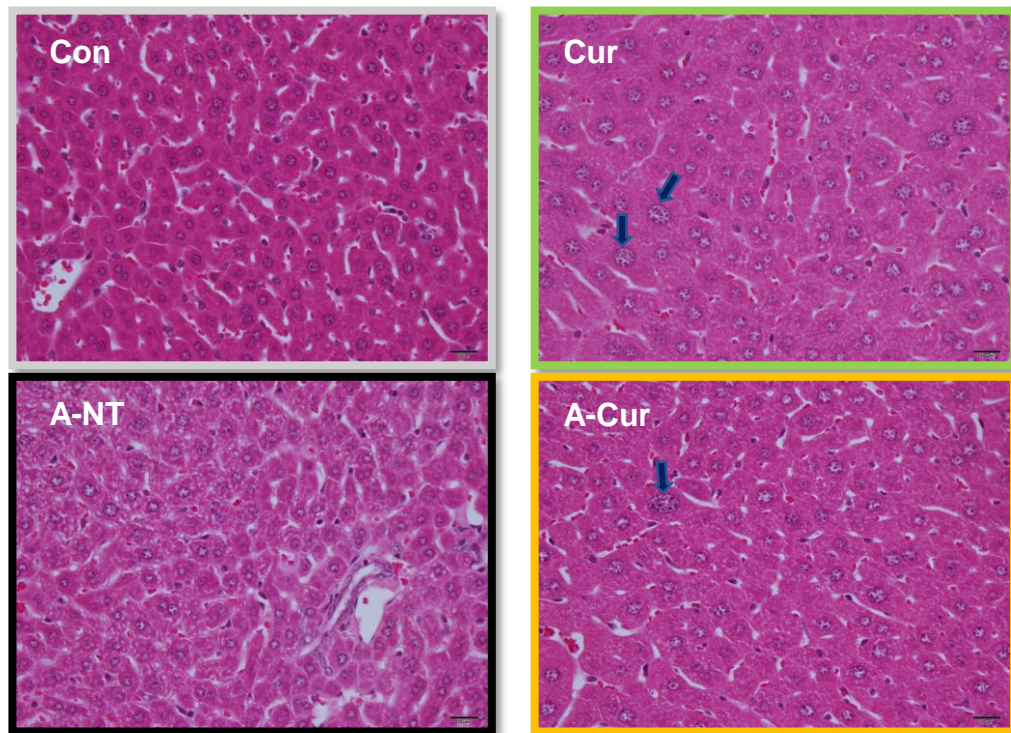

b

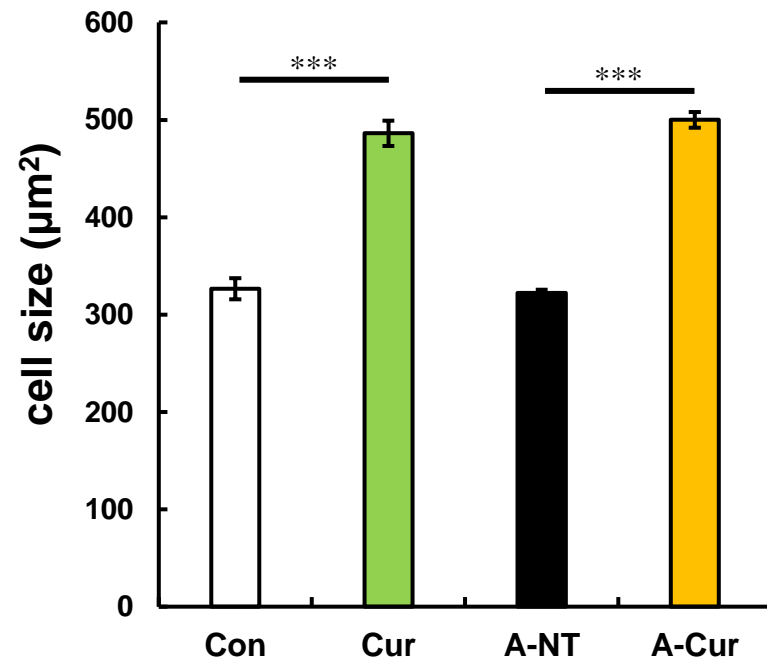

Supplement: supp [file elife-63538-supp-v1.zip › elife_poa_e63538_Figure_1_figure_supplement_4.pdf]

**Figure 1-figure supplement 5**

**a**

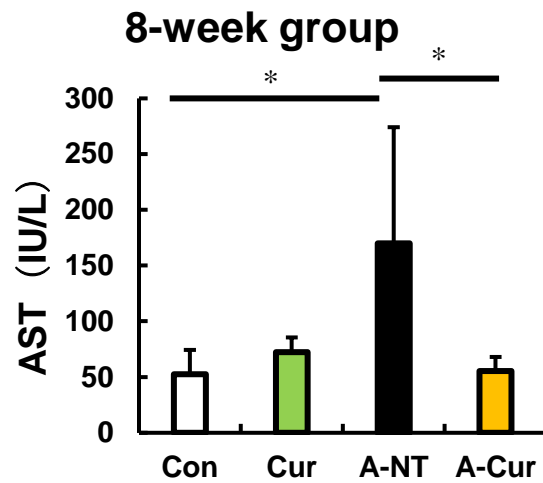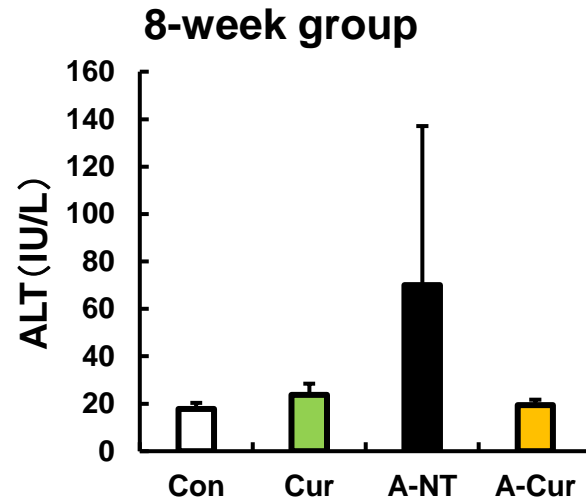

**b**

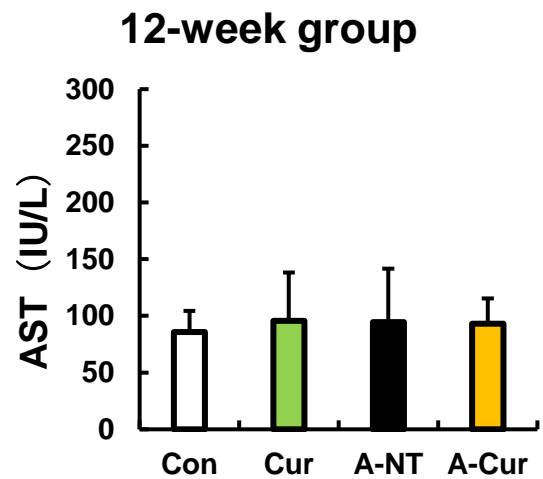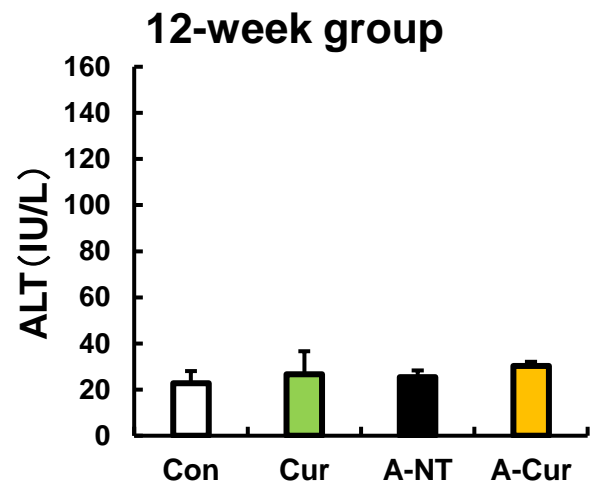

Supplement: supp [file elife-63538-supp-v1.zip › elife_poa_e63538_Figure_1_figure_supplement_5.pdf]

Figure 1-figure supplement 6

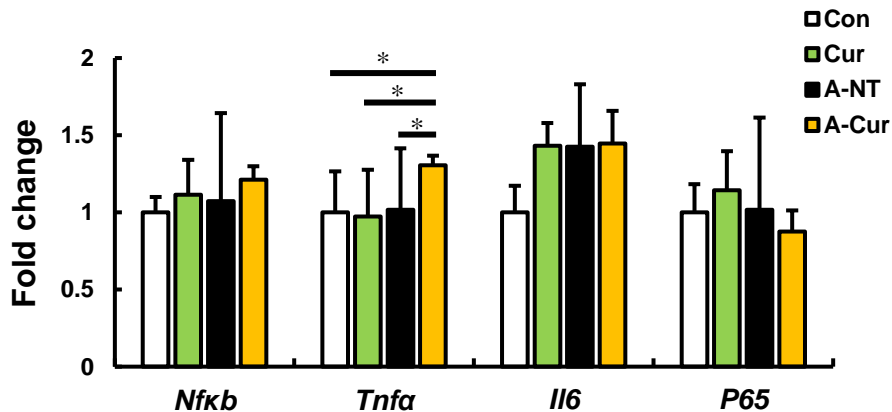

Supplement: supp [file elife-63538-supp-v1.zip › elife_poa_e63538_Figure_1_figure_supplement_6.pdf]

# Figure 1-figure supplement 7

**a**

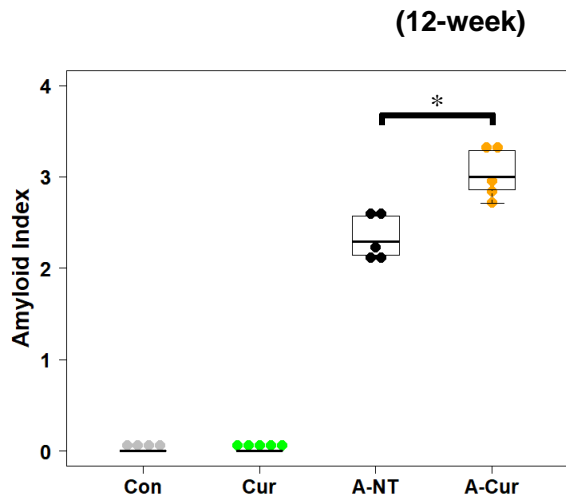

**b**

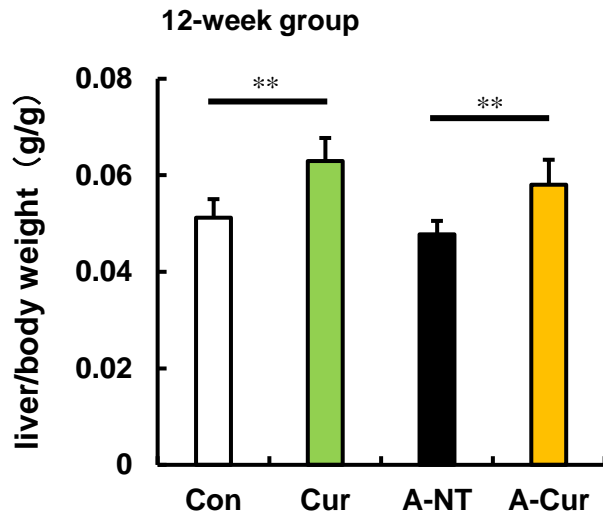

Supplement: supp [file elife-63538-supp-v1.zip › elife_poa_e63538_Figure_1_figure_supplement_7.pdf]

Figure 2-supplement figure 1

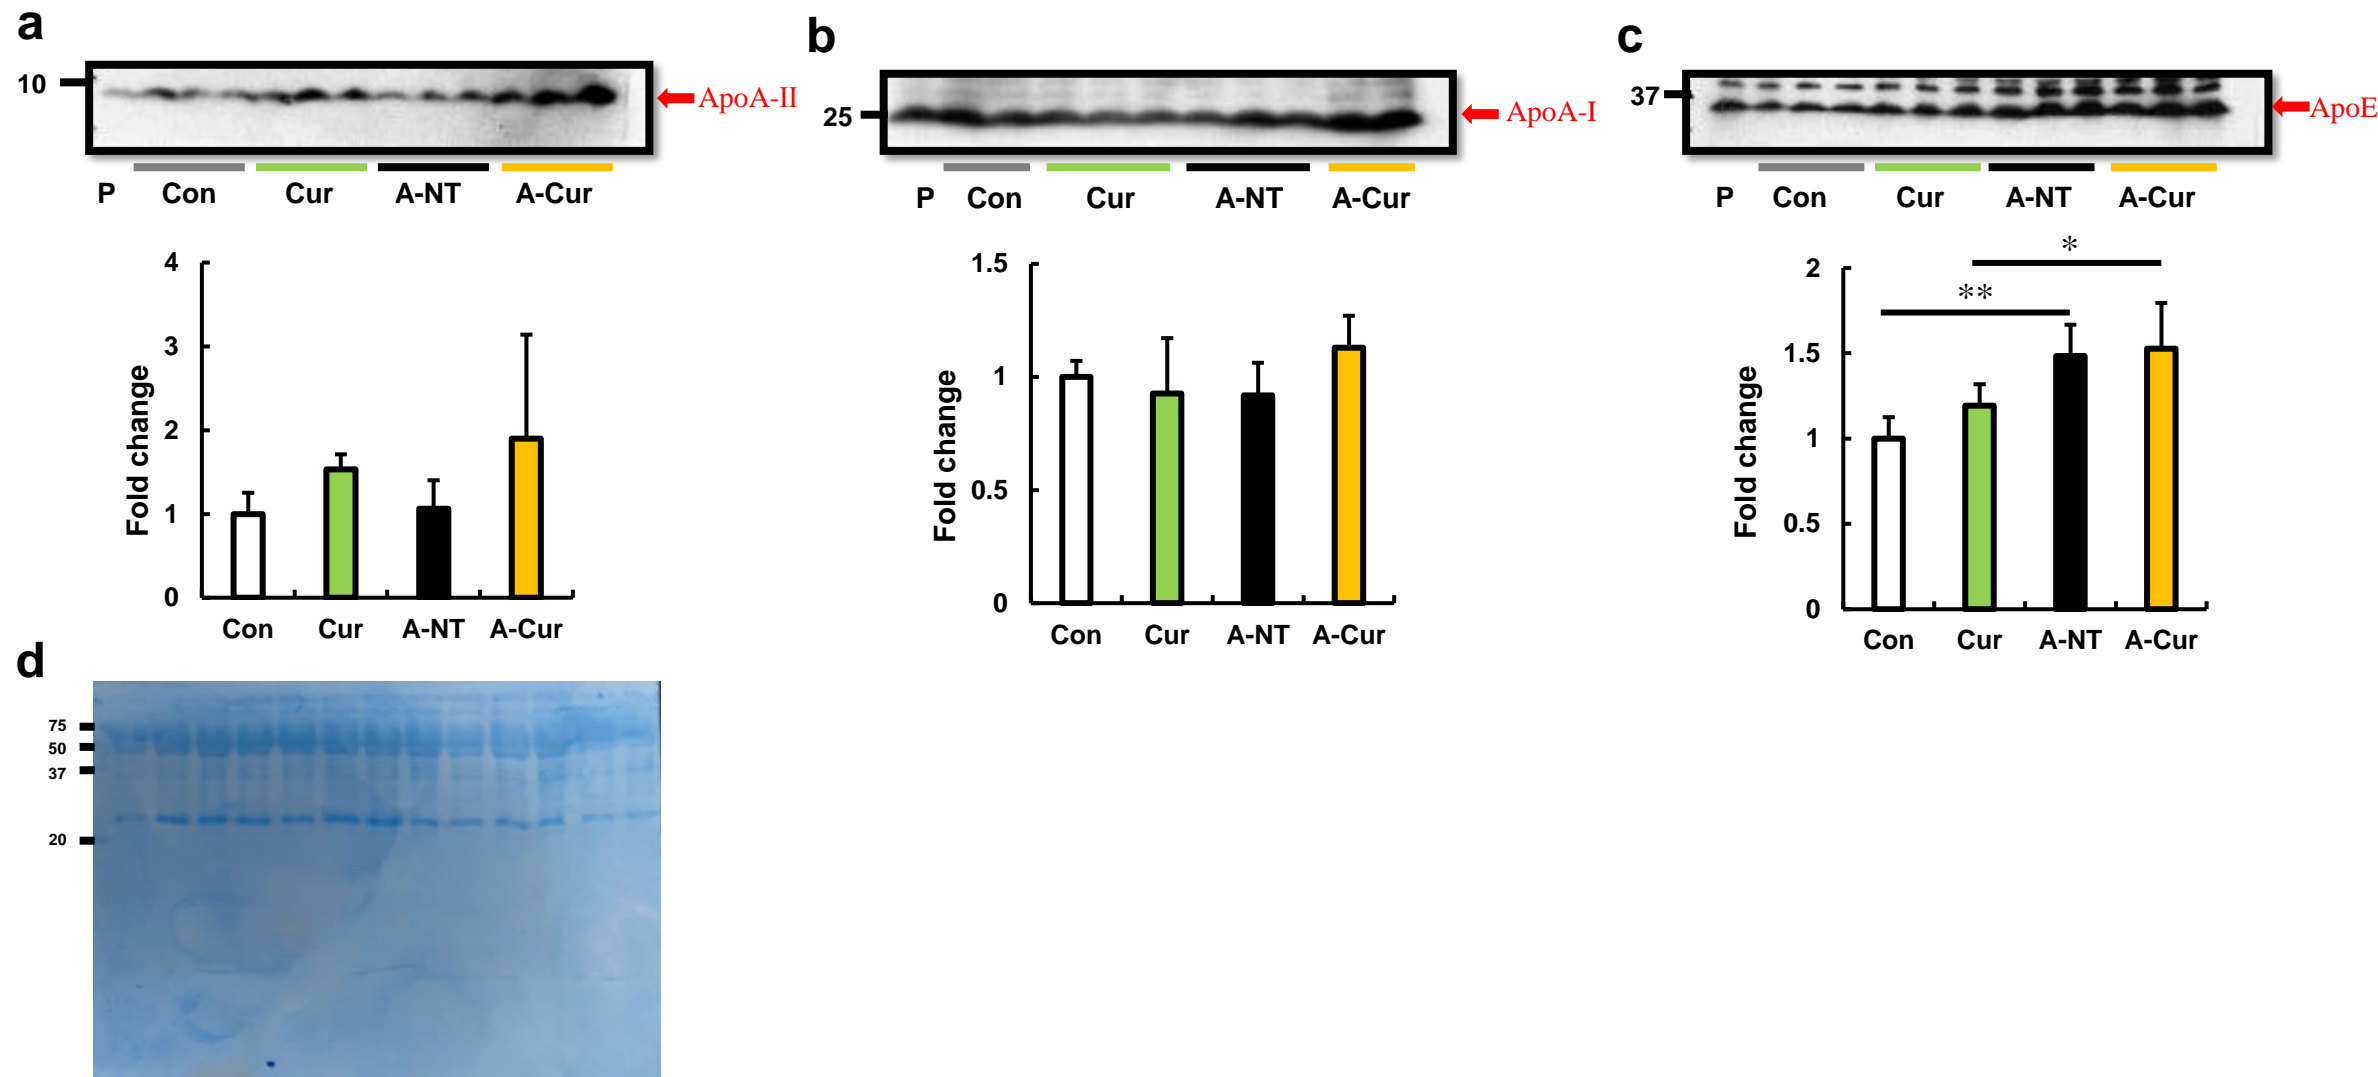

Supplement: supp [file elife-63538-supp-v1.zip › elife_poa_e63538_Figure_2_figure_supplement_1.pdf]

Figure 3-figure supplement 1

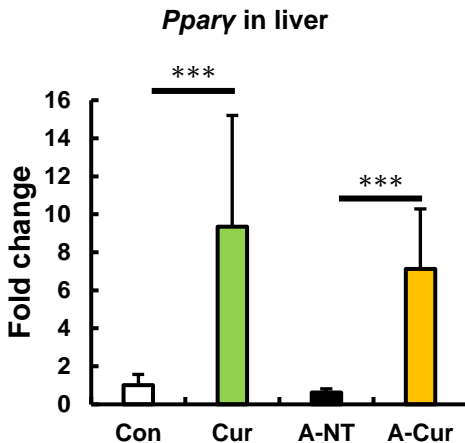

Supplement: supp [file elife-63538-supp-v1.zip › elife_poa_e63538_Figure_3_figure_supplement_1.pdf]
